# Supplementary material for: General ppm-level Pd-catalysed asymmetric diarylalkyne hydrosilylation to access structurally diverse Si-stereogenic vinylsilanes
Source: Royal Society of Chemistry journal article supplement (doi:10.1039/d4qo01698j), 2024-10-16
Supplement: d4qo01698j1.pdf [file d4qo01698j1.pdf]

# Supporting Information

## A general ppm-level Pd-catalysed asymmetric diarylalkyne hydrosilylation to access structurally diverse Si-stereogenic vinylsilanes

Heng Xu<sup>a</sup>, Han-Xiao Yu<sup>a</sup>, An-Jiu Wen<sup>a</sup>, Fang-Ying Ling<sup>a</sup>, Fei Ye<sup>a</sup>, Li Li<sup>a</sup>, Fuk Yee Kwong<sup>b</sup>, and Li-Wen Xu\*

<sup>a</sup> Key Laboratory of Organosilicon Chemistry and Material Technology of Ministry of Education, and Key Laboratory of Organosilicon Material Technology of Zhejiang Province, Hangzhou Normal University, No. 2318, Yuhangtang Road, Hangzhou 311121, P. R. China

E-mail: [liwenxu@hznu.edu.cn](mailto:liwenxu@hznu.edu.cn)

<sup>b</sup> Department of Chemistry and State Key Laboratory of Synthetic Chemistry and Shenzhen Municipal Key Laboratory of Chemical Synthesis of Medicinal Organic Molecules, Shenzhen Research Institute, The Chinese University of Hong Kong, Shatin, New Territories, Hong Kong, China

## Table of Contents

|                                                                                             |    |
|---------------------------------------------------------------------------------------------|----|
| 1 General Information .....                                                                 | 3  |
| 1.1 Evaluation of reaction parameters .....                                                 | 4  |
| 2 Experimental Section .....                                                                | 6  |
| 2.1 Preparation of substrates .....                                                         | 6  |
| 2.2 General procedure for the synthesis of <b>3</b> .....                                   | 9  |
| 2.3 General procedure for the synthesis of <b>9</b> .....                                   | 9  |
| 2.3.1 Characterization of Si-stereogenic vinylsilanes <b>3</b> and <b>9</b> .....           | 10 |
| 2.3.2 Synthetic applications of Si-stereogenic monohydrosilanes .....                       | 31 |
| 2.4 Gram-scale synthesis of <b>3a</b> .....                                                 | 33 |
| 2.5 The effect of ligand on the configuration of product .....                              | 33 |
| 2.6 Synthesis of chiral poly(vinylsilane) <b>5</b> bearing Si-stereogenic center .....      | 34 |
| 2.6.3 Preparation of polyalkyne <b>4</b> .....                                              | 34 |
| 2.6.4 Synthesis of chiral poly(vinylsilane) <b>5</b> via Pd-catalyzed hydrosilylation ..... | 34 |
| 2.6.5 CD spectra of poly(vinylsilane) <b>5</b> .....                                        | 35 |
| 2.6.6 SEM images of polyalkyne <b>4</b> and poly(vinylsilane) <b>5</b> .....                | 36 |
| 2.6.7 TG analysis of polyalkyne <b>4</b> and poly(vinylsilane) <b>5</b> .....               | 36 |
| 2.7 Kinetic studies for the Pd-catalyzed hydrosilylation of <b>1a</b> and <b>2a</b> .....   | 37 |
| 2.8 Experiments for non-linear effect .....                                                 | 38 |
| 2.9 DFT calculations for the ECD spectrum of chiral product <b>3a</b> . .....               | 40 |
| 2.10 X-Ray structure of <b>9e</b> .....                                                     | 41 |
| 3 NMR Spectra .....                                                                         | 43 |
| 4 HPLC .....                                                                                | 87 |

## 1 General Information

Unless specifically stated, all reagents were commercially obtained and where appropriate, purified prior to use. Dichloromethane (DCM), toluene, were freshly distilled from CaH<sub>2</sub>. Ether (Et<sub>2</sub>O), tetrahydrofuran (THF), 1,4-dioxane and Cyclohexane were dried and distilled from metal sodium and benzophenone. Alcohol solvents were dried and distilled from metal magnesium. Other commercially available reagents and solvents were used directly without purification. Reactions were monitored by thin layer chromatography (TLC) using silica gel plates. Flash column chromatography was performed over silica (200 - 300 mesh). NMR spectra were recorded on a Bruker 400 MHz or 500 MHz (400 MHz for <sup>1</sup>H; 100 MHz for <sup>13</sup>C, 500 MHz for <sup>19</sup>F, 400MHz). The chemical shifts ( $\delta$ , ppm) were quoted in parts per million (ppm) referenced to TMS (0.00 ppm for <sup>1</sup>H NMR) and CDCl<sub>3</sub> (77.16 ppm for <sup>13</sup>C NMR) The following abbreviations were used to explain multiplicities: s = singlet, d = doublet, dd = doublets of doublet, t = triplet, q = quartet, m = multiplets. Coupling constants, J, were reported in Hertz unit (Hz). High resolution mass spectra (HRMS) of the products were obtained on a Bruker Daltonics micro TOF-spectrometer. HPLC analyses were carried out with an Agilent 1260 infinity, Waters AcQuity HPLC or Waters AcQuity UPLC using a chiralcel AD-H column, a chiralcel MD column, a chiralcel OX column, a chiralcel AS-H column and a chiral Phenomenex column.

## 1.1 Evaluation of reaction parameters

**Table S1. Screening of the chiral phosphine ligands**

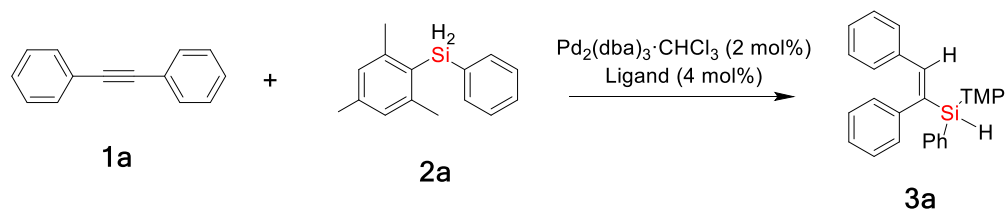

| Entry | Ligand     | Solvent     | T (°C) | Yield of <b>3a</b> (%) <sup>c</sup> | ee of <b>3</b> (%) <sup>d</sup> |
|-------|------------|-------------|--------|-------------------------------------|---------------------------------|
| 1     | <b>L1</b>  | DCM         | rt     | 93                                  | 0                               |
| 2     | <b>L2</b>  | DCM         | rt     | NR                                  |                                 |
| 3     | <b>L3</b>  | DCM         | rt     | 10                                  | 10                              |
| 4     | <b>L4</b>  | DCM         | rt     | NR                                  |                                 |
| 5     | <b>L5</b>  | DCM         | rt     | 30                                  | 0                               |
| 6     | <b>L6</b>  | cyclohexane | 0      | NR                                  |                                 |
| 7     | <b>L7</b>  | cyclohexane | 0      | 85                                  | 82                              |
| 8     | <b>L8</b>  | cyclohexane | 0      | 72                                  | 87                              |
| 9     | <b>L9</b>  | cyclohexane | 0      | 90                                  | 92                              |
| 10    | <b>L10</b> | cyclohexane | 0      | 75                                  | 72                              |
| 11    | <b>L11</b> | cyclohexane | 0      | 65                                  | 85                              |
| 12    | <b>L12</b> | cyclohexane | 0      | 90                                  | 85                              |
| 13    | <b>L13</b> | cyclohexane | 0      | 89                                  | 83                              |
| 14    | <b>L14</b> | cyclohexane | 0      | 88                                  | 87                              |
| 15    | <b>L15</b> | DCM         | 0      | 40                                  | 23                              |
| 16    | <b>L16</b> | DCM         | 0      | 23                                  | 8                               |
| 17    | <b>L14</b> | DCM         | 0      | Trace                               | -                               |
| 18    | <b>L14</b> | DCM         | rt     | 76                                  | 90                              |
| 19    | <b>L14</b> | THF         | rt     | 67                                  | 89                              |

<sup>a</sup> Unless otherwise noted, reactions were conducted under  $\text{N}_2$  on 0.2 mmol scale: **1a** (0.2 mmol), **2a** (0.2 mmol),  $\text{Pd}_2(\text{dba})_3 \cdot \text{CHCl}_3$  (2 mol%), ligand (8 mol%), DCM (1 mL). <sup>b</sup> Determined by  $^1\text{H}$  NMR using dibromomethane as an internal standard. <sup>c</sup> Determined by GC-MS.

<sup>d</sup> Determined by chiral HPLC.

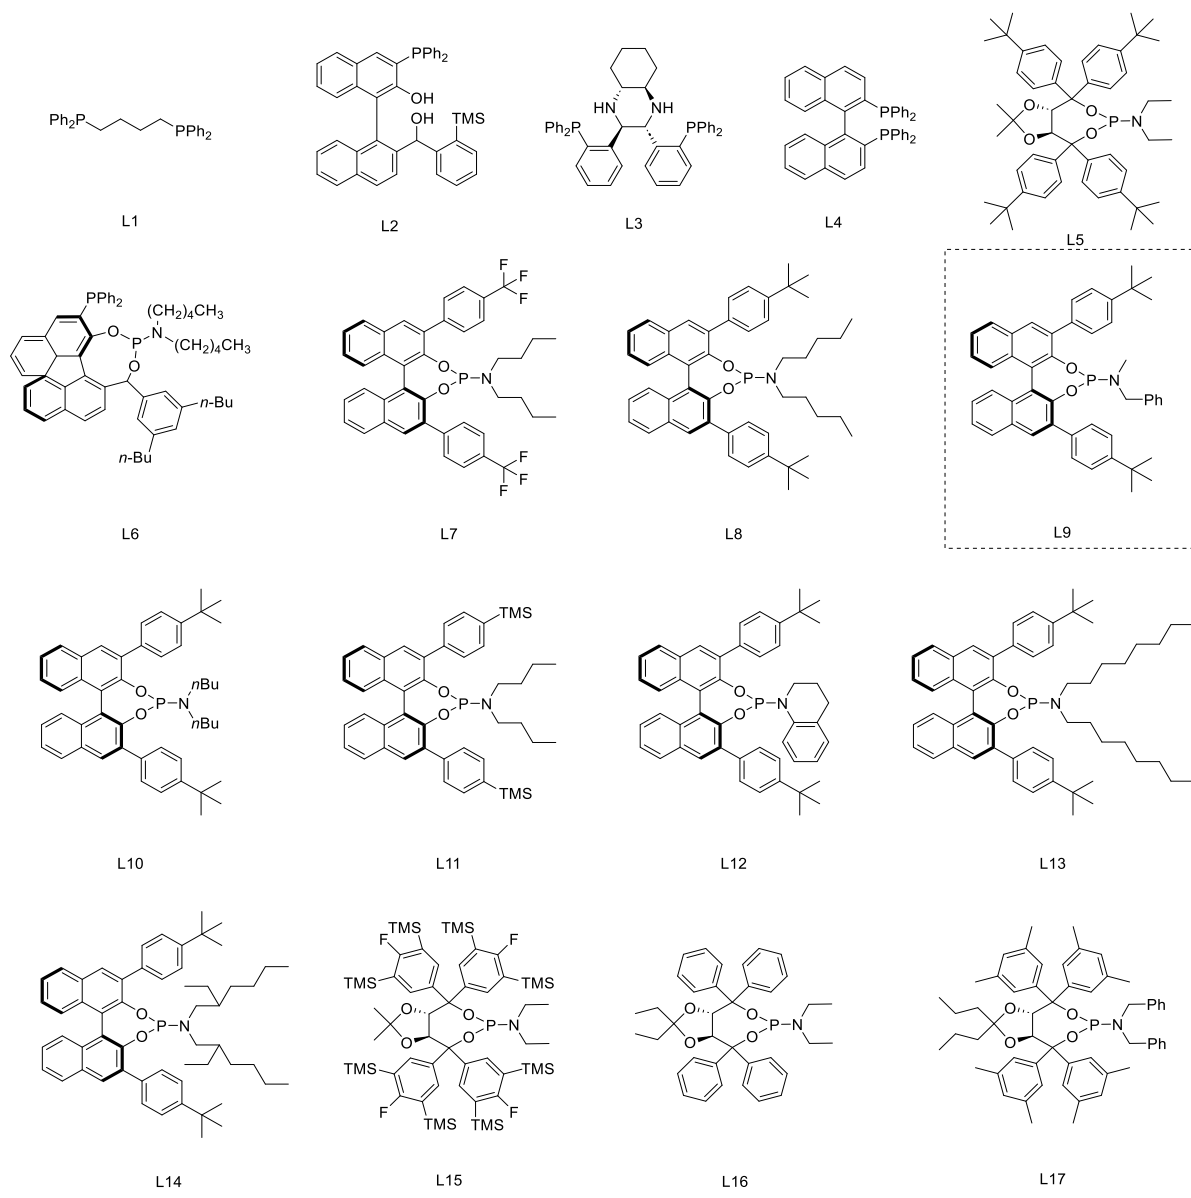

### Chiral P-ligands L1-L16

## 2 Experimental Section

### 2.1 Preparation of substrates

#### A): General procedure for the preparation of (2,6-dimethylphenyl)(phenyl)silane from 2-bromo-1,3-dimethylbenzene

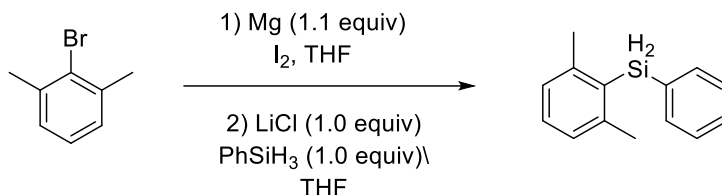

To a dried 2-neck round bottom flask equipped with a water-cooled condenser was added magnesium turnings (534.8 mg, 22.0 mmol, 1.1 equiv.), and three pieces of iodine partials, and THF (20 mL) under argon. 2-bromo-1,3-dimethylbenzene (4.5 g, 20.0 mmol, 1.0 equiv.) was added slowly over the course of 15 min to the refluxing mixture of THF and magnesium turnings. Following that, the mixture was refluxed for an additional hour. The resulting Grignard reagent was cooled to 25 °C for the following procedure. To a suspension of LiCl (847.8 mg, 20.0 mmol) in 20.0 mL of THF was added the Grignard reagent, followed by the addition of phenylsilane (2.2 g, 20.0 mmol), at room temperature under argon. After the reaction mixture was stirred in an oil bath maintained at 50 °C for 6 h, the reaction was quenched by the addition of an aqueous solution of NH<sub>4</sub>Cl (10.0 mL) at room temperature. The resulting mixture was filtered through Celite and washed with diethyl ether (20 mL x 3). The organic phase was dried over Na<sub>2</sub>SO<sub>4</sub> and concentrated in vacuum to give the crude product, which was purified by chromatography on silica gel eluting with hexane to afford the title compound (2.29 g, 54%) as colorless oil.

#### B): General procedure for the preparation of diaryl alkynes

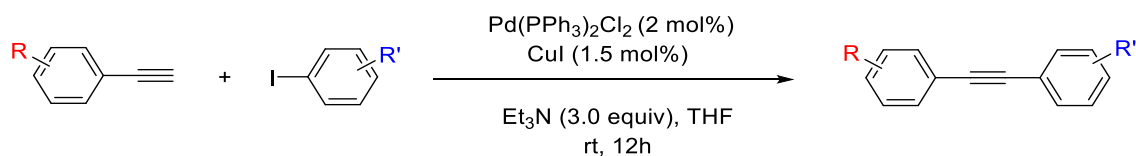

Pd(PPh<sub>3</sub>)<sub>2</sub>Cl<sub>2</sub> (0.04 mmol, 28.04 mg, 2 mol%) catalyst was added to the

reaction tube, and CuI (0.03 mmol, 5.7 mg, 1.5 mol%) and aryl iodide (2.2 mmol, 1.1 equiv) was then added, triethylamine and tetrahydrofuran was added as solvent, the deoxidation operation was performed for 2 minutes, and triethylamine (6 mmol, 3 equiv) and aryl acetylene (2 mmol, 1 equiv) as reactants were added to the mixtures. The reaction was stirred at room temperature for 12 h. After the completion of this reaction, the solvent was removed by a rotary evaporator and the mixtures were separated by silica gel column to get the desired product.

**C) Characterization of ferrocenyl arylacetylene 8**  
**cyclopenta-2,4-dien-1-yl(2-(*m*-tolylethynyl)cyclopenta-2,4-dien-1-yl)iron**

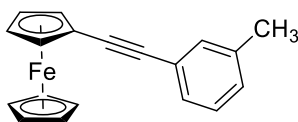

**8a**

Reddish brown viscous oil (49.2 mg, 82% yield) purified by column chromatography (PE/EA= 100:1).  $^1\text{H}$  NMR (400 MHz,  $\text{CDCl}_3$ ):  $\delta$  7.25 – 7.03 (m, 4H), 4.42 (s, 2H), 4.17 (s, 7H), 2.27 (s, 3H).  $^{13}\text{C}$  NMR (100 MHz,  $\text{CDCl}_3$ )  $\delta$  138.1, 132.1, 128.7, 128.6, 128.3, 123.8, 88.0, 86.0, 71.5, 70.1, 68.9, 65.5, 21.4. HRMS (APCI-TOF)  $m/z$ : [M] calcd for  $\text{C}_{19}\text{H}_{16}\text{Fe}$ , 300.0601; found 300.0602. mp 116 - 118 °C.

**(2-((4-(*tert*-butyl)phenyl)ethynyl)cyclopenta-2,4-dien-1-yl)(cyclopenta-2,4-dien-1-yl)iron**

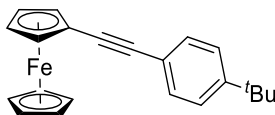

**8b**

Reddish brown viscous solid (470 mg, 69% yield) purified by column chromatography (PE/EA= 100:1).  $^1\text{H}$  NMR (400 MHz,  $\text{CDCl}_3$ ):  $\delta$  7.35 (d,  $J$  = 7.9 Hz, 2H), 7.27 (d,  $J$  = 8.0 Hz, 2H), 4.42 (s, 2H), 4.16 (s, 7H), 1.25 (s, 9H).  $^{13}\text{C}$  NMR (100 MHz,  $\text{CDCl}_3$ )  $\delta$  151.0, 131.2, 125.4, 121.0, 87.6, 85.9, 71.5, 70.1, 68.8, 65.7, 34.9, 31.3. HRMS (APCI-TOF)  $m/z$ : [M] calcd for  $\text{C}_{22}\text{H}_{22}\text{Fe}$ , 342.1071; found 342.1063.

mp 149 - 151 °C.

**cyclopenta-2,4-dien-1-yl(2-((4-ethylphenyl)ethynyl)cyclopenta-2,4-dien-1-yl)iron**

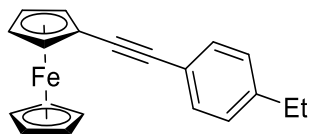

**8c**

Reddish brown viscous solid (310 mg, 49% yield) purified by column chromatography (PE/EA= 100:1). <sup>1</sup>H NMR (400 MHz, CDCl<sub>3</sub>): δ 7.40 (d, *J* = 7.9 Hz, 2H), 7.14 (d, *J* = 8.0 Hz, 2H), 4.49 (s, 2H), 4.23 (s, 7H), 2.63 (q, *J* = 8.1 Hz, 2H), 1.23 (t, *J* = 7.9 Hz, 3H). <sup>13</sup>C NMR (100 MHz, CDCl<sub>3</sub>) δ 144.2, 131.5, 127.97, 121.2, 87.6, 86.0, 71.5, 70.1, 68.8, 65.7, 28.9, 15.5. HRMS (APCI-TOF) *m/z*: [M] calcd for C<sub>20</sub>H<sub>18</sub>Fe, 314.0758; found 314.0759. mp 82 - 86 °C.

**cyclopenta-2,4-dien-1-yl(2-((4-isopropylphenyl)ethynyl)cyclopenta-2,4-dien-1-yl)iron**

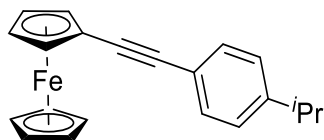

**8d**

Reddish brown viscous solid (510 mg, 78% yield) purified by column chromatography (PE/EA= 100:1). <sup>1</sup>H NMR (400 MHz, CDCl<sub>3</sub>): δ 7.41 (d, *J* = 8.2 Hz, 2H), 7.17 (d, *J* = 8.2 Hz, 2H), 4.49 (s, 2H), 4.24 – 4.21 (m, 7H), 2.90 (dt, *J* = 13.7, 6.9 Hz, 1H), 1.24 (d, *J* = 7 Hz, 6H). <sup>13</sup>C NMR (100 MHz, CDCl<sub>3</sub>) δ 148.8, 131.5, 126.6, 121.4, 87.6, 86.00, 71.5, 70.1, 68.8, 65.7, 34.2, 24.0. HRMS (APCI-TOF) *m/z*: [M] calcd for C<sub>21</sub>H<sub>20</sub>Fe, 328.0914; found 328.0921. mp 108- 110 °C.



## 2.2 General procedure for the synthesis of 3

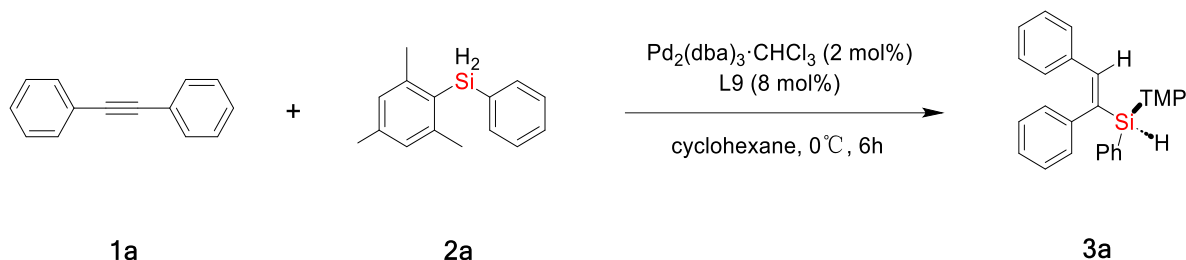

In a flame dried Schlenk tube,  $\text{Pd}_2(\text{dba})_3 \cdot \text{CHCl}_3$  (4.1 mg, 0.004 mmol, 2 mol%), **L9** (11.2 mg, 0.016 mmol, 8 mol%) in cyclohexane (1 mL, 0.2 M) was stirred at room temperature for 30 min under nitrogen atmosphere. Then diaryl alkyne **1a** (0.2 mmol, 1 equiv), dihydrosilanes were added sequentially to the reaction mixture, and the reaction tube was cooled at 0 °C and then stirred for 6 h. After completion of the reaction, the mixture was passed through a short celite pad using DCM as a solvent. The mixture was then concentrated in vacuo and purified by column chromatography using PE and EA (70:1) to give the desired product **3a** in good yields.

## 2.3 General procedure for the synthesis of 9

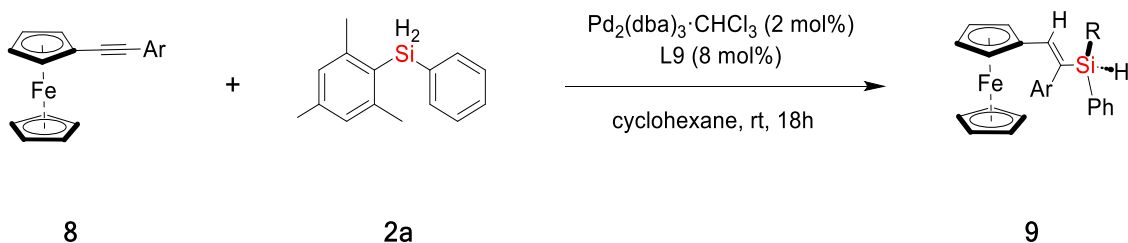

In a flame dried Schlenk tube,  $\text{Pd}_2(\text{dba})_3 \cdot \text{CHCl}_3$  (4.1 mg, 0.004 mmol, 2 mol%), **L9** (11.2 mg, 0.016 mmol, 8 mol%) in cyclohexane (1 mL, 0.2 M) was stirred at room temperature for 30 min under nitrogen atmosphere. Then ferrocenyl arylacetylene **8** (0.2 mmol, 1 equiv), dihydrosilanes were added sequentially to the reaction mixture, and the reaction tube was cooled at r.t and then stirred for 18 h. After completion of the reaction, the mixture was passed through a short celite pad using DCM as a solvent. The mixture was then concentrated in vacuo and purified by column chromatography using PE and EA (70:1) to give the desired product **9** in good yields.

### 2.3.1 Characterization of Si-stereogenic vinylsilanes **3** and **9**

#### (*S,E*)-(1,2-diphenylvinyl)(mesityl)(phenyl)silane

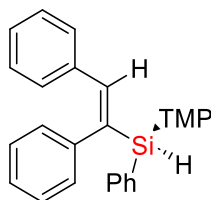

**3a**

**3a** was synthesized following the general procedure C. Yellow liquid (69.3 mg, 90% yield). purified by column chromatography (PE/EA= 80:1).  $[\alpha]_D^{20} = 58.1$  ( $c = 1.04$ ,  $\text{CHCl}_3$ ).  $^1\text{H NMR}$  (400 MHz,  $\text{CDCl}_3$ ):  $\delta$  7.42 (d,  $J = 6.8$  Hz, 2H), 7.17 - 7.11 (m, 3H), 7.06 - 6.95 (m, 5H), 6.91 - 6.90 (m, 6H), 6.70 (s, 2H), 5.49 (s, 1H), 2.21 (s, 6H), 2.12 (s, 3H).  $^{13}\text{C NMR}$  (100 MHz,  $\text{CDCl}_3$ )  $\delta$  145.7, 142.2, 140.4, 139.9, 137.3, 135.8, 134.1, 129.7, 129.7, 129.5, 128.9, 128.8, 128.19, 128.16, 128.1, 128.0, 127.5, 126.7, 126.3, 24.6, 21.4. HRMS (APCI-TOF)  $m/z$ :  $[\text{M} + \text{Na}]^+$  calcd for  $\text{C}_{29}\text{H}_{28}\text{Si}$ , 455.2156; found 455.2162;

HPLC: Chiralpak MD column (hexanes: isopropanol = 99.9:0.1, 0.4 mL/min, 254 nm, 92% ee).  $t_R = 7.83$  min (minor),  $t_R = 10.33$  min (major).

#### (*S, E*)-(1,2-*di-p*-tolylvinyl)(mesityl)(phenyl)silane

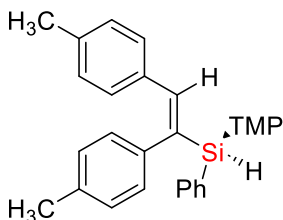

**3b**

**3b** was synthesized following the general procedure C. Yellow liquid (69.3 mg, 80% yield). purified by column chromatography (PE/EA= 80:1).  $[\alpha]_D^{20} = 64.6$  ( $c = 1.075$ ,  $\text{CHCl}_3$ ).  $^1\text{H NMR}$  (400 MHz,  $\text{CDCl}_3$ ):  $\delta$  7.50 (d,  $J = 1.5$  Hz, 1H), 7.50 (d,  $J = 1.5$  Hz, 1H), 7.34 - 7.16 (m, 3H), 7.00 - 6.95 (, 4H), 6.89 - 6.84 (m, 5H), 6.81 (s, 2H), 5.49 (s, 1H), 2.29 (s, 6H) 2.60 (s, 3H), 2.26 (s, 3H), 2.20 (s, 3H).  $^{13}\text{C NMR}$  (100 MHz,  $\text{CDCl}_3$ )  $\delta$  145.7, 142.0, 139.8, 139.3, 139.1, 137.3, 135.9, 135.7, 134.7, 134.4, 129.6,

129.5, 129.4, 128.9, 128.7, 128.0, 127.9, 127.1, 24.6, 21.4, 21.3, 21.3. HRMS (APCI-TOF)  $m/z$ :  $[M + Na]^+$  calcd for  $C_{31}H_{32}Si$ , 455.2156; found 455.2162;

HPLC: Chiralpak MD column (hexanes: isopropanol = 99.9:0.1, 0.4 mL/min, 254 nm, 92% ee).  $t_R = 7.83$  min (minor),  $t_R = 10.33$  min (major).

**(S, E)-(1,2-bis(4-isopropylphenyl)vinyl)(mesityl)(phenyl)silane**

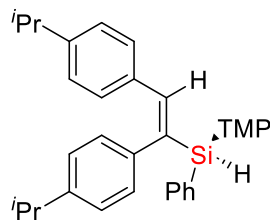

**3c**

**3c** was synthesized following the general procedure C. Clear viscous liquid (71.8 mg, 74% yield). purified by column chromatography (PE/EA= 80:1).  $[\alpha]_D^{20} = 38.0$  ( $c = 1.47$ ,  $CHCl_3$ ).  $^1H$  NMR (400 MHz,  $CDCl_3$ ):  $\delta$  7.55 (d,  $J = 1.6$  Hz, 1H), 7.53 (d,  $J = 1.6$  Hz, 1H), 7.37 - 7.31 (m, 3H), 7.12 - 7.05 (m, 4H), 7.00 - 6.94 (m, 4H), 6.90 (s, 1H), 6.87 (s, 2H), 5.54 (s, 1H), 2.91 (dt,  $J = 29.1, 6.4$  Hz, 2H), 2.33 (s, 6H), 2.32 (s, 3H), 1.25 (d,  $J = 6.8$  Hz, 6H), 1.19 (d,  $J = 7.0$  Hz, 6H).  $^{13}C$  NMR (100 MHz,  $CDCl_3$ )  $\delta$  148.3, 146.8, 145.8, 141.9, 139.8, 139.7, 139.2, 135.9, 135.0, 134.6, 129.8, 129.3, 128.9, 128.0, 127.9, 127.1, 126.9, 126.1, 33.93, 33.86, 24.19, 24.16, 24.2, 23.97, 23.95, 21.4. HRMS (APCI-TOF)  $m/z$ :  $[M + K]^+$  calcd for  $C_{35}H_{40}Si$ , 527.2531; found 527.2530;

HPLC: Chiralpak MD column (hexanes: isopropanol = 99.9:0.1, 0.4mL/min, 254 nm, 94% ee).  $t_R = 5.13$ min (minor),  $t_R = 7.50$  min (major).

**(S, E)-(1,2-bis(4-(tert-butyl)phenyl)vinyl)(mesityl)(phenyl)silane**

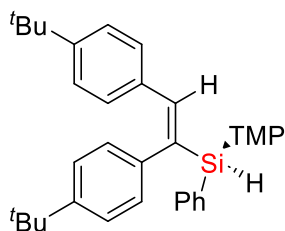

**3d**

**3d** was synthesized following the general procedure C. Yellow liquid (70.0 mg, 62% yield). purified by column chromatography (PE/EA= 80:1).  $[\alpha]_D^{20} = 6.8$  ( $c = 0.85$ ,  $\text{CHCl}_3$ ).  $^1\text{H NMR}$  (400 MHz,  $\text{CDCl}_3$ ):  $\delta$  7.44 (d,  $J = 1.5$  Hz, 1H), 7.42 (d,  $J = 1.6$  Hz, 1H), 7.27 - 7.15 (m, 5H), 7.03 (d,  $J = 8.2$ Hz, 2H), 6.97 (d,  $J = 8.4$  Hz, 2H), 6.86 (d,  $J = 8.2$  Hz, 2H), 6.80 (s, 1H), 6.76 (s, 2H), 5.44 (s, 1H), 2.22 (s, 6H), 2.20 (s, 3H), 1.22 (s, 9H), 1.15 (s, 9H).  $^{13}\text{CNMR}$  (100 MHz,  $\text{CDCl}_3$ )  $\delta$  150.6, 149.1, 145.8, 141.7, 139.8, 139.3, 139.2, 135.9, 134.63, 134.62, 129.5, 129.3, 128.9, 128.0, 127.5, 127.1, 125.7, 125.0, 34.7, 34.58, 31.55, 31.3, 24.6, 21.4. HRMS (APCI-TOF)  $m/z$ :  $[\text{M} + \text{K}]^+$  calcd for  $\text{C}_{37}\text{H}_{44}\text{Si}$ , 555.2844; found 555.2825; HPLC: Chiralpak MD column (hexanes: isopropanol = 99.9:0.1, 0.4mL/min, 254 nm, 91% ee).  $t_R = 6.70$  min (minor),  $t_R = 8.84$  min (major).

**(S, E)-(1,2-bis(4-ethylphenyl)vinyl)(mesityl)(phenyl)silane**

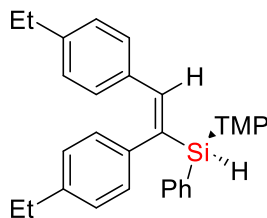

**3e**

**3e** was synthesized following the general procedure C. Clear viscous liquid (49.6 mg, 54% yield). purified by column chromatography (PE/EA= 80:1)  $[\alpha]_D^{20} = 42.1$  ( $c = 0.28$ ,  $\text{CHCl}_3$ ).  $^1\text{H NMR}$  (400 MHz,  $\text{CDCl}_3$ ):  $\delta$  7.57 (d,  $J = 1.6$  Hz, 1H), 7.55 (d,  $J = 1.6$  Hz, 1H), 7.36 - 7.33 (m, 3H), 7.08 (s, 4H), 6.96 (s, 4H), 6.92 (s, 1H), 6.88 (s, 2H), 5.57 (s, 1H), 2.63 (q,  $J = 7.6$  Hz, 2H), 2.56 (q,  $J = 7.6$  Hz, 2H), 2.36 (s, 6H) 2.32 (s, 3H), 1.26 (t,  $J = 7.6$  Hz, 3H), 1.20 (t,  $J = 7.6$  Hz, 3H).  $^{13}\text{C NMR}$  (100 MHz,  $\text{CDCl}_3$ )  $\delta$  145.8, 143.7, 142.1, 142.0, 139.8, 139.5, 139.2, 135.9, 135.0, 134.6, 129.8, 129.3, 128.9, 128.3, 128.01, 127.97, 127.6, 127.2, 28.67, 28.65, 24.6, 21.4, 15.6, 15.4. HRMS (APCI-TOF)  $m/z$ :  $[\text{M} + \text{K}]^+$  calcd for  $\text{C}_{33}\text{H}_{36}\text{Si}$ , 499.2218; found 499.2213; HPLC: Chiralpak MD column (hexanes: isopropanol = 99.9:0.1, 0.6mL/min, 254 nm, 91% ee).  $t_R = 5.95$  min (minor),  $t_R = 6.57$  min (major).

**(S, E)-(1,2-bis(4-fluorophenyl)vinyl)(mesityl)(phenyl)silane**

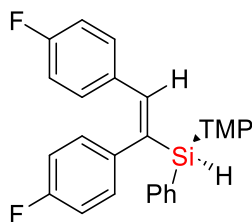

**3f**

**3f** was synthesized following the general procedure C. Yellow liquid (86.4 mg, 97% yield). purified by column chromatography (PE/EA= 80:1).  $[\alpha]_{\text{D}}^{20} = 36.3$  ( $c = 0.65$ ,  $\text{CHCl}_3$ ).  $^1\text{H NMR}$  (400 MHz,  $\text{CDCl}_3$ ):  $\delta$  7.43 (d,  $J = 1.6$  Hz, 1H), 7.42 (d,  $J = 1.2$  Hz, 1H) 7.29 - 7.20 (m, 3H), 6.97-6.93 (m, 2H), 6.86-6.80 (m, 5H), 6.76 (s, 2H), 6.70 (dd,  $J = 8.8$  Hz, 2H), 5.47 (s, 1H), 2.24 (s, 6H), 2.19 (s, 3H).  $^{13}\text{C NMR}$  (100 MHz,  $\text{CDCl}_3$ )  $\delta$  162.0 (d,  $J_{\text{C-F}} = 247$  Hz), 161.7 (d,  $J_{\text{C-F}} = 244$  Hz), 145.66, 141.37, 140.18, 139.11 (d,  $J_{\text{C-F}} = 1$  Hz), 137.69 (d,  $J_{\text{C-F}} = 3$  Hz), 135.84, 133.72 (d,  $J_{\text{C-F}} = 4$  Hz), 133.29, 133.25, 131.4 (d,  $J_{\text{C-F}} = 8$  Hz), 131.29, 129.71, 129.64 (d,  $J_{\text{C-F}} = 2$  Hz), 129.62, 129.01, 128.17, 126.33, 115.9 (d,  $J_{\text{C-F}} = 21$  Hz), 115.1 (d,  $J_{\text{C-F}} = 21$  Hz), 24.60, 21.35.  $^{19}\text{F NMR}$  (500 MHz,  $\text{CDCl}_3$ )  $\delta$  -113.42, -116.09. HRMS (APCI-TOF)  $m/z$ :  $[\text{M} + \text{Na}]^+$  calcd for  $\text{C}_{29}\text{H}_{26}\text{F}_2\text{Si}$ , 463.1664; found 463.1644; HPLC: Chiralpak MD column (hexanes: isopropanol = 99.9:0.1, 0.4 mL/min, 254 nm, 91% ee).  $t_{\text{R}} = 6.86$  min (minor),  $t_{\text{R}} = 7.69$  min (major).

**(S, E)-1,2-bis(4-(trifluoromethyl)phenyl)vinyl(mesityl)(phenyl)silane**

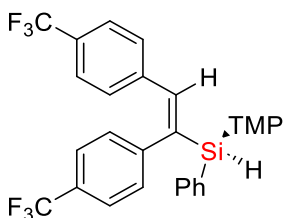

**3g**

**3g** was synthesized following the general procedure C. Yellow liquid (102.6 mg, 95% yield). purified by column chromatography (PE/EA= 80:1).  $[\alpha]_{\text{D}}^{20} = 46.1$  ( $c = 0.43$ ,  $\text{CHCl}_3$ ).  $^1\text{H NMR}$  (400 MHz,  $\text{CDCl}_3$ ):  $\delta$  7.45 (d,  $J = 1.2$  Hz, 1H), 7.44 (d,  $J = 2.0$  Hz, 1H) 7.39 (d,  $J = 8.2$  Hz, 2H), 7.29 - 7.22 (m, 5H), 7.09 (d,  $J = 8.0$  Hz, 2H), 6.95 (m, 3H), 6.79 (s, 2H), 5.49 (s, 1H), 2.26 (s, 6H), 2.21 (s, 3H).  $^{13}\text{C NMR}$  (100 MHz,

CDCl<sub>3</sub>)  $\delta$  145.7, 145.6, 142.7, 141.5, 140.6, 140.2, 135.9, 132.9, 130.0, 129.8, 129.2, 128.3 (d,  $J_{C-F}$  = 2 Hz), 126.8 (q,  $J_{C-F}$  = 270 Hz), 125.5 (q,  $J_{C-F}$  = 270 Hz), 125.9 (q,  $J_{C-F}$  = 4 Hz), 125.7, 125.2 (q,  $J_{C-F}$  = 4 Hz), 24.6, 21.4. <sup>19</sup>F NMR (500 MHz, CDCl<sub>3</sub>)  $\delta$  -62.32, -62.64. HRMS (APCI-TOF) m/z: [M + K]<sup>+</sup> calcd for C<sub>31</sub>H<sub>26</sub>F<sub>6</sub>Si, 579.1340; found 579.1323

HPLC: Chiralpak MD column (hexanes: isopropanol = 99.9:0.1, 0.6mL/min, 254 nm, 91% ee).  $t_R$  = 9.65 min (minor),  $t_R$  = 11.60 min (major).

**(S, E)-(1,2-bis(3-chlorophenyl)vinyl)(mesityl)(phenyl)silane**

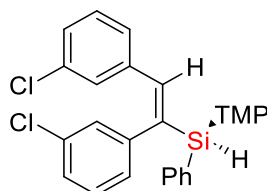

**3h**

**3h** was synthesized following the general procedure C. Yellow liquid (79.3 mg, 84% yield). purified by column chromatography (PE/EA= 80:1). [ $\alpha$ ]<sub>D</sub><sup>20</sup> = 34.6 (c = 0.925, CHCl<sub>3</sub>). <sup>1</sup>H NMR (400 MHz, CDCl<sub>3</sub>):  $\delta$  7.45 (d,  $J$  = 1.6 Hz, 1H), 7.43 (d,  $J$  = 1.6 Hz, 1H) 7.38 (d,  $J$  = 8.2 Hz, 2H), 7.30 - 7.22 (m, 5H), 7.09 (d,  $J$  = 8.0 Hz, 2H), 6.95 - 6.93 (m, 3H), 6.78 (s, 2H), 5.49 (s, 1H), 2.25 (s, 6H), 2.20 (s, 3H). <sup>13</sup>C NMR (100 MHz, CDCl<sub>3</sub>)  $\delta$  145.7, 145.6, 142.7, 141.5, 140.6, 140.2, 135.9, 132.9, 130.0, 129.7, 129.2, 128.34, 128.32, 125.98, 125.95, 125.9, 125.87, 125.6, 125.24, 125.20, 125.2, 125.1, 24.6, 21.4. HRMS (APCI-TOF) m/z: [M +]<sup>+</sup> calcd for C<sub>29</sub>H<sub>26</sub>Cl<sub>2</sub>Si, 472.1175; found 472.1800;

HPLC: Chiralpak MD column (hexanes: isopropanol = 99.9:0.1, 0.4mL/min, 254 nm, 92% ee).  $t_R$  = 9.76 min (minor),  $t_R$  = 12.74 min (major).

**(S, E)-(1,2-bis(4-chlorophenyl)vinyl)(mesityl)(phenyl)silane**

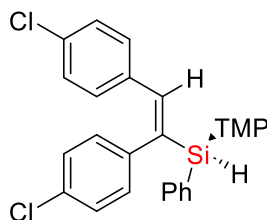

**3i**

**3i** was synthesized following the general procedure C. Yellow liquid (84.1 mg, 89% yield). purified by column chromatography (PE/EA= 80:1).  $[\alpha]_D^{20} = 37.2$  ( $c = 1.65$ ,  $\text{CHCl}_3$ ).  $^1\text{H NMR}$  (400 MHz,  $\text{CDCl}_3$ ):  $\delta$  7.43 (d,  $J = 1.6$  Hz, 1H), 7.42 (d,  $J = 2.0$  Hz, 1H), 7.29 - 7.22 (m, 3H), 7.10 (d,  $J = 8.2$  Hz, 2H), 6.99 (d,  $J = 8.2$  Hz, 2H), 6.92 (d,  $J = 8.2$  Hz, 2H), 6.82 - 6.80 (m, 3H), 6.77 (s, 2H), 5.46 (s, 1H), 2.24 (s, 6H), 2.20 (s, 3H).  $^{13}\text{C NMR}$  (100 MHz,  $\text{CDCl}_3$ )  $\delta$  145.6, 141.3, 140.28, 140.25, 140.2, 135.9, 135.4, 133.4, 132.4, 130.9, 129.7, 129.4, 129.2, 129.1, 128.4, 128.2, 126.1, 26.4, 21.4. HRMS (APCI-TOF)  $m/z$ :  $[\text{M} + \text{K}]^+$  calcd for  $\text{C}_{29}\text{H}_{26}\text{Cl}_2\text{Si}$ , 511.0812; found 511.0813;

HPLC: Chiralpak MD column (hexanes: isopropanol = 99.9:0.1, 0.4mL/min, 254 nm, 91% ee).  $t_R = 8.59$  min (minor),  $t_R = 10.36$  min (major).

**(S, E)-1,2-bis(4-bromophenyl)vinyl(mesityl)(phenyl)silane**

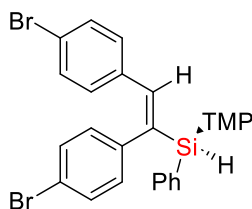

**3j**

**3j** was synthesized following the general procedure C. Yellow liquid (44.8 mg, 42% yield). purified by column chromatography (PE/EA= 80:1).  $[\alpha]_D^{20} = 12.4$  ( $c = 0.78$ ,  $\text{CHCl}_3$ ).  $^1\text{H NMR}$  (400 MHz,  $\text{CDCl}_3$ ):  $\delta$  7.44 (d,  $J = 1.6$  Hz, 1H), 7.42 (d,  $J = 1.6$  Hz, 1H) 7.30 - 7.23 (m, 5H), 7.17 - 7.15 (m, 2H), 6.87 (d,  $J = 8.2$  Hz, 2H), 6.79 (m, 3H), 6.74 (d,  $J = 8.2$  Hz, 2H), 5.45 (s, 1H), 2.25 (s, 6H), 2.21 (s, 3H).  $^{13}\text{C NMR}$  (100 MHz,  $\text{CDCl}_3$ )  $\delta$  145.6, 141.3, 140.7, 140.4, 140.3, 135.8, 133.3, 132.2, 131.3, 131.1, 129.8, 129.7, 129.1, 128.2, 126.0, 121.7, 120.5, 24.6, 21.4. HRMS (APCI-TOF)  $m/z$ :  $[\text{M} + \text{Na}]^+$  calcd for  $\text{C}_{29}\text{H}_{26}\text{Br}_2\text{Si}$ , 583.0063; found 583.0060.

HPLC: Chiralpak MD column (hexanes: isopropanol = 99.9:0.1, 0.4mL/min, 254 nm, 90% ee).  $t_R = 7.85$  min (minor),  $t_R = 9.81$  min (major).

**(S, E)-(1,2-bis(3-fluorophenyl)vinyl)(mesityl)(phenyl)silane**

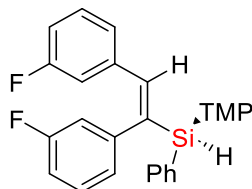

**3k**

**3k** was synthesized following the general procedure C. Yellow liquid (79.2 mg, 90% yield). purified by column chromatography (PE/EA= 80:1).  $[\alpha]_D^{20} = 46.1$  ( $c = 0.53$ ,  $\text{CHCl}_3$ ).  $^1\text{H NMR}$  (400 MHz,  $\text{CDCl}_3$ ):  $\delta$  7.44 (d,  $J = 1.6$  Hz, 1H), 7.42 (d,  $J = 1.6$  Hz, 1H), 7.29 - 7.21 (m, 3H), 7.11 - 7.06 (m, 1H) 7.00 - 6.95 (m, 1H) 6.83 (s, 1H), 6.79 - 6.65 (m, 7H), 6.56 (d,  $J = 12.2$  Hz, 1H), 5.48 (s, 1H), 2.25 (s, 6H), 2.20 (s, 3H).  $^{13}\text{C NMR}$  (100 MHz,  $\text{CDCl}_3$ )  $\delta$  163.2 (d,  $J_{\text{C-F}} = 245$  Hz), 162.5 (d,  $J_{\text{C-F}} = 244$  Hz) 145.7, 144.0 (d,  $J_{\text{C-F}} = 7$  Hz), 141.4 (d,  $J_{\text{C-F}} = 2$  Hz), 141.2 (d,  $J_{\text{C-F}} = 2$  Hz), 140.3, 139.1 (d,  $J_{\text{C-F}} = 7$  Hz), 135.8, 133.3, 130.4 (d,  $J_{\text{C-F}} = 9$  Hz), 129.8, 129.6 (d,  $J_{\text{C-F}} = 8$  Hz), 129.1, 128.2, 125.9, 125.4 (d,  $J_{\text{C-F}} = 2$  Hz), 123.7 (d,  $J_{\text{C-F}} = 3$  Hz), 116.1 (d,  $J_{\text{C-F}} = 22$  Hz), 114.7 (d,  $J_{\text{C-F}} = 44$  Hz), 114.7 (d,  $J_{\text{C-F}} = 2$  Hz), 114.5, 113.5 (d,  $J_{\text{C-F}} = 21$  Hz), 24.6, 21.4.  $^{19}\text{F NMR}$  (500 MHz,  $\text{CDCl}_3$ )  $\delta$  -112.58, -113.29. HRMS (APCI-TOF)  $m/z$ :  $[\text{M} + \text{H}]^+$  calcd for  $\text{C}_{29}\text{H}_{26}\text{F}_2\text{Si}$ , 463.1664; found 463.1125; HPLC: Chiralpak MD column (hexanes: isopropanol = 99.9:0.1, 0.6mL/min, 254 nm, 88% ee).  $t_R = 7.67$  min (minor),  $t_R = 9.86$  min (major).

**(S, E)-(1,2-bis(2-fluorophenyl)vinyl)(mesityl)(phenyl)silane**

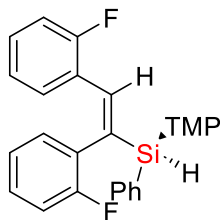

**3l**

**3l** was synthesized following the general procedure C. Yellow liquid (86.2 mg,



98% yield). purified by column chromatography (PE/EA= 80:1).  $[\alpha]_D^{20} = 60.4$  ( $c = 0.75$ ,  $\text{CHCl}_3$ )  $^1\text{H NMR}$  (400 MHz,  $\text{CDCl}_3$ ):  $\delta$  7.47 (d,  $J = 1.6\text{Hz}$ , 1H), 7.46 (d,  $J = 1.6\text{Hz}$ , 1H), 7.25 - 7.18 (m, 4H), 7.00 - 6.98 (m, 3H), 6.89 - 6.74 (m, 6H), 6.68 (dd,  $J = 8.2\text{Hz}$ , 1H), 5.54 (s, 1H), 2.28 (s, 6H), 2.19 (s, 3H).  $^{13}\text{C NMR}$  (100 MHz,  $\text{CDCl}_3$ )  $\delta$  160.5 (d,  $J_{\text{C-F}} = 247\text{ Hz}$ ), 158.9 (d,  $J_{\text{C-F}} = 247\text{ Hz}$ ), 145.8, 140.2, 137.2 (d,  $J_{\text{C-F}} = 4\text{ Hz}$ ), 135.8, 133.6, 130.2 (d,  $J_{\text{C-F}} = 4\text{ Hz}$ ), 129.6, 129.5 (d,  $J_{\text{C-F}} = 3\text{ Hz}$ ), 129.3 (d,  $J_{\text{C-F}} = 8\text{ Hz}$ ), 128.9, 128.4 (d,  $J_{\text{C-F}} = 7\text{ Hz}$ ), 128.1, 126.2, 125.6 (d,  $J_{\text{C-F}} = 13\text{ Hz}$ ), 124.3 (d,  $J_{\text{C-F}} = 3\text{ Hz}$ ), 123.5 (d,  $J_{\text{C-F}} = 4\text{ Hz}$ ), 115.7 (d,  $J_{\text{C-F}} = 47\text{ Hz}$ ), 115.5 (d,  $J_{\text{C-F}} = 47\text{ Hz}$ ), 24.6, 21.3.  $^{19}\text{F NMR}$  (500 MHz,  $\text{CDCl}_3$ )  $\delta$  -113.31, -115.55 (m). HRMS (APCI-TOF)  $m/z$ :  $[\text{M} + \text{Na}]^+$  calcd for  $\text{C}_{29}\text{H}_{26}\text{F}_2\text{Si}$ , 463.1664; found 463.1648; HPLC: Chiralpak MD column (hexanes: isopropanol = 99.9:0.1, 0.6mL/min, 254 nm, 92% ee).  $t_R = 10.07\text{ min}$  (minor),  $t_R = 13.53\text{ min}$  (major).

**(S, E)-(2,6-dimethylphenyl)(1,2-diphenylvinyl)(phenyl)silane**

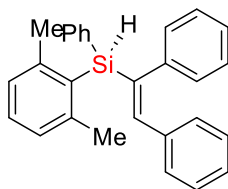

**3m**

**3m** was synthesized following the general procedure C. Yellow liquid (69.4 mg, 89% yield). purified by column chromatography (PE/EA= 80:1).  $[\alpha]_D^{20} = 43.6$  ( $c = 1.59$ ,  $\text{CHCl}_3$ ).  $^1\text{H NMR}$  (400 MHz,  $\text{CDCl}_3$ ):  $\delta$  7.46 (d,  $J = 7.6\text{ Hz}$ , 2H), 7.27 - 7.23 (m, 3H), 7.15-7.10 (m, 3H), 7.08 - 7.00 (m, 6H), 6.93 - 6.88 (m, 5H), 5.52 (dd,  $J = 8.2\text{ Hz}$ , 1H), 2.29 (s, 6H).  $^{13}\text{C NMR}$  (100 MHz,  $\text{CDCl}_3$ )  $\delta$  145.7, 142.3, 142.1, 140.1, 137.3, 135.9, 133.9, 130.4, 130.2, 129.7, 129.5, 128.8, 128.12, 128.07, 127.9, 127.5, 126.4, 24.8. HRMS (APCI-TOF)  $m/z$ :  $[\text{M} + \text{Na}]^+$  calcd for  $\text{C}_{28}\text{H}_{26}\text{Si}$ , 413.1696, found 413.1695; HPLC: Chiralpak MD column (hexanes: isopropanol = 99.9:0.1, 0.4mL/min, 254 nm, 86% ee).  $t_R = 9.07\text{ min}$  (minor),  $t_R = 10.23\text{ min}$  (major).

**(S, E)-(1,2-bis(3-methoxyphenyl)vinyl)(mesityl)(phenyl)silane**

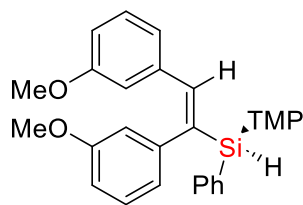

**3n**

**3n** was synthesized following the general procedure C. Yellow liquid (82.7 mg, 89% yield). purified by column chromatography (PE/EA= 80:1).  $[\alpha]_D^{20} = 38.3$  ( $c = 1.6$ ,  $\text{CHCl}_3$ ).  $^1\text{H NMR}$   $\delta$  7.48 (d,  $J = 7.0$  Hz, 2H), 7.28 - 7.23 (m, 3H), 7.06 (dd,  $J = 8$  Hz, 1H), 6.95 (dd,  $J = 8$  Hz, 1H), 6.85 (s, 1H), 6.77(s, 2H), 6.67 - 6.55 (m, 5H), 6.48 (s, 1H), 5.48 (s, 1H), 3.50(s, 3H), 3.39 (s, 3H), 2.27 (s, 6H), 2.20 (s, 3H).  $^{13}\text{C NMR}$  (100 MHz,  $\text{CDCl}_3$ )  $\delta$  159.9, 159.1, 145.7, 143.7, 141.9, 140.5, 140.0, 138.5, 135.9, 134.0, 129.8, 129.0, 128.9, 128.1, 126.7, 122.6, 120.5, 114.3, 113.8, 113.0, 112.4, 55.1, 54.9, 24.6, 21.3. HRMS (APCI-TOF)  $m/z$ :  $[\text{M} + \text{K}]^+$  calcd for  $\text{C}_{31}\text{H}_{32}\text{O}_2\text{Si}$ , 489.1647; found 489.1632; HPLC: Chiralpak MD column (hexanes: isopropanol = 98: 2, 0.5mL/min, 254 nm, 80% ee).  $t_R = 7.79$  min (minor),  $t_R = 8.71$  min (major).

**(S, E)-1,2-di(thiophen-2-yl)vinyl(mesityl)(phenyl)silane**

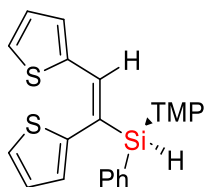

**3o**

**3o** was synthesized following the general procedure C. Yellow liquid (75.4mg, 88% yield). purified by column chromatography (PE/EA= 80:1).  $[\alpha]_D^{20} = 35.6$  ( $c = 1.0$ ,  $\text{CHCl}_3$ ).  $^1\text{H NMR}$  (400 MHz,  $\text{CDCl}_3$ ):  $\delta$  7.48 (d,  $J = 1.6$  Hz, 1H), 7.46 (d,  $J = 1.6$  Hz, 1H) 7.29 - 7.20 (m, 4H), 7.10 (s, 1H), 7.03 (d,  $J = 6.0$  Hz, 1H), 6.92 - 6.90 (m, 1H), 6.84 (d,  $J = 5.2$  Hz, 1H), 6.76 (m, 3H), 6.70 (d,  $J = 4.8$  Hz, 1H), 5.45 (s, 1H), 2.25 (s, 6H), 2.20 (s, 3H).  $^{13}\text{C NMR}$  (100 MHz,  $\text{CDCl}_3$ )  $\delta$  144.8, 141.0, 139.4, 139.1, 137.2, 134.8, 132.5, 129.5, 129.3, 128.7, 127.9, 127.23, 127.16, 126.8, 125.2, 125.13, 125.12, 124.8, 23.6, 20.4. HRMS (APCI-TOF)  $m/z$ :  $[\text{M} + \text{Na}]^+$  calcd for  $\text{C}_{25}\text{H}_{24}\text{S}_2\text{Si}$ ,

439.0981; found 439.0982;

HPLC: Chiralpak MD column (hexanes: isopropanol = 98:2, 0.6mL/min, 254 nm, 87% ee).  $t_R$  = 16.08 min (minor),  $t_R$  = 18.00 min (major).

**(S, E)-(1,2-di(naphthalen-2-yl)vinyl)(mesityl)(phenyl)silane**

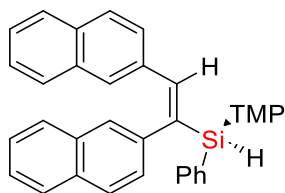

**3p**

**3p** was synthesized following the general procedure C. Yellow liquid (75.4 mg, 75% yield). purified by column chromatography (PE/EA= 80:1).  $[\alpha]_D^{20} = 42.3$  ( $c = 0.74$ ,  $\text{CHCl}_3$ ).  $^1\text{H NMR}$  (400 MHz,  $\text{CDCl}_3$ ):  $\delta$  7.63 - 7.47 (m, 7H), 7.44 - 7.42 (m, 2H) 7.28 - 7.14 (m, 9H), 7.12 - 7.10(m, 1H) 6.93 - 6.90 (m, 1H) 7.45 (d,  $J = 6.0$  Hz, 2H), 5.61(s, 1H), 2.28 (s, 6H), 2.17 (s, 3H).  $^{13}\text{C NMR}$  (100 MHz,  $\text{CDCl}_3$ )  $\delta$  145.7, 142.6, 140.4, 140.1, 139.9, 136.0, 135.1, 134.1, 133.9, 133.3, 132.7, 132.2, 129.6, 129.5, 129.0, 128.3, 128.2, 128.1, 128.1, 127.8, 127.6, 127.4, 127.3, 127.1, 126.8, 126.6, 126.2, 126.1, 125.9, 125.6, 24.7, 21.4. HRMS (APCI-TOF)  $m/z$ :  $[\text{M} + \text{Na}]^+$  calcd for  $\text{C}_{37}\text{H}_{32}\text{Si}$ , 527.2165; found 527.2156;

HPLC: Chiralpak MD column (hexanes: isopropanol = 99.8: 0.2, 0.5mL/min, 254nm, 84%),  $t_R$  = 10.69 (minor),  $t_R$  = 13.36 min (major).

**(S, E)-3,3'-(1-(mesityl(phenyl)silyl)ethene-1,2-diyl)dipyridine**

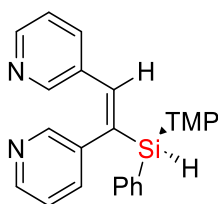

**3q**

**3q** was synthesized following the general procedure C. Clear viscous liquid (30.4 mg, 38% yield) purified by column chromatography (PE/EA= 80:1).  $[\alpha]_D^{20} = 21.5$  ( $c = 0.2$ ,  $\text{CHCl}_3$ ).  $^1\text{H NMR}$  (400 MHz,  $\text{CDCl}_3$ ):  $\delta$  8.35 (dd,  $J = 1.6$  Hz, 1H), 8.28

(dd,  $J = 1.6$  Hz, 1H), 8.24 (d,  $J = 2.8$  Hz, 1H), 8.19 (d,  $J = 1.6$ Hz, 1H), 7.49 (d,  $J = 1.6$  Hz, 1H), 7.47 (d,  $J = 1.6$  Hz, 1H), 7.34 - 7.27 (m, 4H), 7.20 (s, 1H), 7.10 - 7.07(m, 2H), 6.97 (s, 1H), 6.80 (s, 2H), 5.52 (s, 1H), 2.27 (s, 6H), 2.22 (s, 3H).  $^{13}\text{C}$  NMR (100 MHz,  $\text{CDCl}_3$ )  $\delta$  150.7, 148.6, 148.5, 147.8, 145.6, 140.6, 140.3, 140.2, 136.1, 135.9, 135.7, 132.5, 130.0, 129.2, 128.4, 125.2, 123.8, 123.1, 24.6, 21.4. HRMS (APCI-TOF)  $m/z$ :  $[\text{M} + \text{Na}]^+$  calcd for  $\text{C}_{27}\text{H}_{26}\text{N}_2\text{Si}$ , 429.1757; found 429.1755; HPLC: Chiralpak MD column (hexanes: isopropanol = 80: 20, 0.5 mL/min, 254 nm, 87% ee).  $t_{\text{R}} = 5.20$  (minor),  $t_{\text{R}} = 6.06$  min (major).

**(*R,E*)-(1,2-diphenylvinyl)(phenyl)(*o*-tolyl)silane**

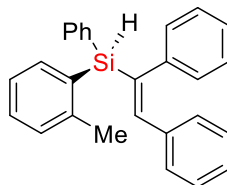

**3r**

**3r** was synthesized following the general procedure C. Yellow liquid (64.7 mg, 86% yield). purified by column chromatography (PE/EA= 80:1).  $[\alpha]_{\text{D}}^{20} = -26.8$  ( $c = 0.25$ ,  $\text{CHCl}_3$ ).  $^1\text{H}$  NMR (400 MHz,  $\text{CDCl}_3$ ):  $\delta$  7.50 (d,  $J = 6.4$  Hz, 2H), 7.34 - 7.22 (m, 5H), 7.13 - 7.09 (m, 3H), 7.07 – 6.98 (m, 7H), 6.91 – 6.88 (m, 2H), 6.80 (s, 1H). 5.29 (s, 1H), 2.37 (s, 3H).  $^{13}\text{C}$  NMR (100 MHz,  $\text{CDCl}_3$ )  $\delta$  144.9, 142.9, 142.1, 139.9, 137.1, 137.1, 136.1, 133.1, 132.0, 130.3, 129.9, 129.8, 128.8, 128.2, 128.1, 128.1, 127.6, 126.3, 125.2, 22.8. HRMS (APCI-TOF)  $m/z$ :  $[\text{M} + \text{Na}]^+$  calcd for  $\text{C}_{27}\text{H}_{24}\text{Si}$ , 399.1539, found 399.1541; HPLC: Chiralpak MD column (hexanes: isopropanol = 99.9:0.1, 0.5 mL/min, 254 nm, 34% ee).  $t_{\text{R}} = 7.976$  min (minor),  $t_{\text{R}} = 9.499$  min (major).

**cyclopenta-2,4-dien-1-yl(3-((*E*)-2-((*S*)-mesityl(phenyl)silyl)-2-phenylvinyl)cyclopenta-2,4-dien-1-yl)iron**

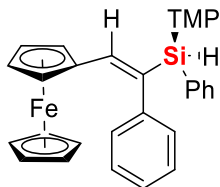

**9a**

**9a** was synthesized following the general procedure D. Reddish brown viscous oil (77mg, 75% yield) purified by column chromatography (PE/EA= 100:1).  $[\alpha]_D^{20} = -34.33$  ( $c = 0.3$ ,  $\text{CHCl}_3$ ).  $^1\text{H NMR}$  (400 MHz,  $\text{CDCl}_3$ ):  $\delta$  7.46 (d,  $J = 6.1$  Hz, 2H), 7.28 – 7.16 (m, 5H), 7.10 (d,  $J = 7.2$  Hz, 1H), 7.05 – 7.03 (m, 2H), 6.76 (s, 2H), 6.64 (s, 1H), 5.40 (s, 1H), 3.95 (s, 7H), 3.69 (d,  $J = 10.1$  Hz, 2H), 2.24 (s, 6H), 2.20 (s, 3H).  $^{13}\text{C NMR}$  (100 MHz,  $\text{CDCl}_3$ )  $\delta$  145.6, 143.2, 141.3, 139.8, 135.7, 135.6, 134.6, 129.3, 128.8, 128.5, 128.2, 128.0, 127.0, 126.1, 81.4, 70.0, 69.9, 69.3, 69.2, 24.7, 21.4. HRMS (APCI-TOF)  $m/z$ :  $[M]$  calcd for  $\text{C}_{33}\text{H}_{32}\text{FeSi}$ , 512.1623; found 512.1642; HPLC: Chiralpak MD column (hexanes: isopropanol = 98.1:1.9, 0.5 mL/min, 211 nm, 97% ee).  $t_R = 29.45$  (minor),  $t_R = 34.08$  min (major).

**cyclopenta-2,4-dien-1-yl(3-((*E*)-2-((*S*)-mesityl(phenyl)silyl)-2-(*p*-tolyl)vinyl)cyclopenta-2,4-dien-1-yl)iron**

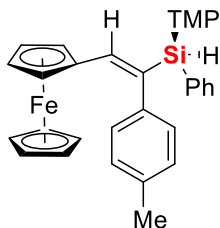

**9b**

**9b** was synthesized following the general procedure D. Reddish brown viscous oil (91.89mg, 87% yield) purified by column chromatography (PE/EA= 100:1).  $[\alpha]_D^{20} = -28.16$  ( $c = 1.14$ ,  $\text{CHCl}_3$ ).  $^1\text{H NMR}$  (400 MHz,  $\text{CDCl}_3$ ):  $\delta$  7.47 (d,  $J = 7.8$  Hz, 2H), 7.29 – 7.22 (m, 3H), 6.99 – 6.92 (m, 4H), 6.78 (s, 2H), 6.61 (s, 1H), 5.38 (s, 1H), 3.94 (s, 7H), 3.72 (d,  $J = 9.5$  Hz, 2H), 2.24 (s, 6H), 2.21 (s, 3H), 2.19 (s, 3H).  $^{13}\text{C NMR}$  (100 MHz,  $\text{CDCl}_3$ )  $\delta$  145.6, 141.2, 140.0, 139.7, 135.8, 135.6, 135.5, 134.8, 129.3,

128.8, 128.0, 127.2, 81.5, 70.0, 69.9, 69.2, 69.1, 24.7, 21.4. HRMS (APCI-TOF)  $m/z$ : [M] calcd for  $C_{34}H_{34}FeSi$ , 526.1779; found 526.1771; HPLC: Chiralpak MD column (hexanes: isopropanol = 98.1:1.9, 0.5 mL/min, 211 nm, 91% ee).  $t_R$  = 11.035 (minor),  $t_R$  = 12.60 min (major).

**cyclopenta-2,4-dien-1-yl(3-((*E*)-2-((*S*)-mesityl(phenyl)silyl)-2-(*m*-tolyl)vinyl)cyclopenta-2,4-dien-1-yl)iron**

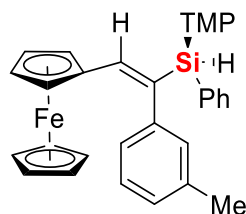

**9c**

**9c** was synthesized following the general procedure D. Reddish brown viscous oil (102.9 mg, 98% yield) purified by column chromatography (PE/EA= 100:1).  $[\alpha]_D^{20} = -10.31$  ( $c = 0.5625$ ,  $CHCl_3$ ).  $^1H$  NMR (400 MHz,  $CDCl_3$ ):  $\delta$  7.45 (d,  $J = 7.8$  Hz, 2H), 7.26 – 7.19 (m, 3H), 7.08 – 7.03 (m, 1H), 6.91 – 6.89 (m, 1H), 6.86 – 6.84 (m, 2H), 6.76 (s, 2H), 6.61 (s, 1H), 5.38 (s, 1H), 3.98 – 3.97 (m, 7H), 3.73 (d,  $J = 11.8$  Hz), 2.24 (m, 12H).  $^{13}C$  NMR (100 MHz,  $CDCl_3$ )  $\delta$  144.6, 142.0, 140.1, 138.7, 136.9, 134.7, 134.7, 133.7, 128.3, 127.81, 127.77, 127.4, 127.0, 126.2, 125.8, 124.2, 80.4, 69.0, 68.9, 68.2, 68.2, 23.7, 20.7, 20.4. HRMS (APCI-TOF)  $m/z$ : [M] calcd for  $C_{34}H_{34}FeSi$ , 526.1779; found 526.1777; HPLC: Chiralpak MD column (hexanes: isopropanol = 98.1:1.9, 0.5 mL/min, 211 nm, 90% ee).  $t_R$  = 18.52 (minor),  $t_R$  = 20.05 min (major).

**(3-((*E*)-2-(4-(tert-butyl)phenyl)-2-((*S*)-mesityl(phenyl)silyl)vinyl)cyclopenta-2,4-dien-1-yl)(cyclopenta-2,4-dien-1-yl)iron**

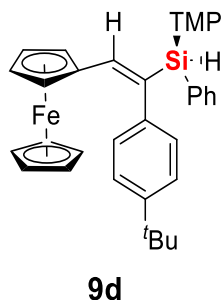

**9d** was synthesized following the general procedure D. Reddish brown viscous oil (106.4 mg, 94% yield) purified by column chromatography (PE/EA= 100:1).  $[\alpha]_D^{20} = -26.9$  ( $c = 1.955$ ,  $\text{CHCl}_3$ ).  $^1\text{H NMR}$  (400 MHz,  $\text{CDCl}_3$ ):  $\delta$  7.45 (d,  $J = 7.9$  Hz, 2H), 7.25 – 7.16 (m, 5H), 6.97 (d,  $J = 8.4$  Hz, 2H), 6.75 (s, 2H), 6.60 (s, 1H), 5.38 (s, 1H), 3.94 (s, 7H), 3.73 (d,  $J = 14.2$  Hz, 2H), 2.23 (s, 6H), 2.19 (s, 3H), 1.21 (s, 9H).  $^{13}\text{C NMR}$  (100 MHz,  $\text{CDCl}_3$ )  $\delta$  148.9, 145.6, 141.2, 139.9, 139.7, 135.7, 135.5, 134.9, 129.2, 128.8, 128.0, 127.7, 127.4, 125.3, 81.6, 70.0, 69.9, 69.2, 69.1, 34.5, 31.6, 24.7, 21.4. HRMS (APCI-TOF)  $m/z$ :  $[M]$  calcd for  $\text{C}_{37}\text{H}_{40}\text{FeSi}$ , 568.2249; found 568.2232;

HPLC: Chiralpak MD column (hexanes: isopropanol = 98.1:1.9, 0.5 mL/min, 211 nm, 96% ee).  $t_R = 20.411$  (major),  $t_R = 26.030$  min (minor).

**(3-((*E*)-2-(4-chlorophenyl)-2-((*S*)-mesityl(phenyl)silyl)vinyl)cyclopenta-2,4-dien-1-yl)(cyclopenta-2,4-dien-1-yl)iron**

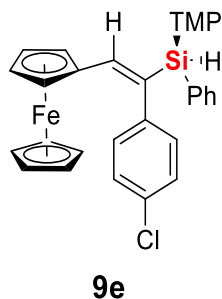

**9e** was synthesized following the general procedure D. Reddish brown viscous oil (80.5 mg, 74% yield) purified by column chromatography (PE/EA= 100:1).  $[\alpha]_D^{20} = -34.62$  ( $c = 0.6875$ ,  $\text{CHCl}_3$ ).  $^1\text{H NMR}$  (400 MHz,  $\text{CDCl}_3$ ):  $\delta$  7.45 (d,  $J = 7.8$  Hz, 2H), 7.29 – 7.21 (m, 3H), 7.16 – 7.14 (m, 2H), 6.98 – 6.96 (m, 2H), 6.77 (s, 2H), 6.65 (s, 1H), 5.37 (s, 1H), 4.00 (s, 2H), 3.95 (s, 5H), 3.71 (d,  $J = 10$  Hz, 2H), 2.23 (s, 6H),

2.20 (s, 3H).  $^{13}\text{C}$  NMR (100 MHz,  $\text{CDCl}_3$ )  $\delta$  145.5, 142.0, 141.7, 140.0, 135.7, 134.2, 131.8, 129.6, 129.5, 128.9, 128.8, 128.1, 126.6, 81.0, 70.0, 69.9, 69.5, 69.4, 69.2, 24.7, 21.4. HRMS (APCI-TOF)  $m/z$ : [M] calcd for  $\text{C}_{33}\text{H}_{31}\text{ClFeSi}$ , 568.2249; found 568.2232;

HPLC: Chiralpak MD column (hexanes: isopropanol = 98.1:1.9, 0.5 mL/min, 211 nm, 96% ee).  $t_{\text{R}}$  = 34.896 (major),  $t_{\text{R}}$  = 41.956 min (minor).

**cyclopenta-2,4-dien-1-yl(3-((*E*)-2-(4-ethylphenyl)-2-((*S*)-mesityl(phenyl)silyl)vinyl)cyclopenta-2,4-dien-1-yl)iron**

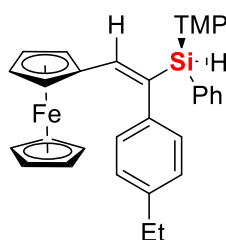

**9f**

**9f** was synthesized following the general procedure D. Reddish brown viscous oil (95.7 mg, 89% yield) purified by column chromatography (PE/EA= 100:1).  $[\alpha]_{\text{D}}^{20}$  = -29.41 ( $c$  = 1.5575,  $\text{CHCl}_3$ ).  $^1\text{H}$  NMR (400 MHz,  $\text{CDCl}_3$ ):  $\delta$  7.43 (d,  $J$  = 5.8 Hz, 2H), 7.19 – 7.12 (m, 3H), 7.00 – 6.93 (m, 4H), 6.71 (s, 2H), 6.60 (s, 1H), 5.39 (s, 1H), 3.90 (s, 7H), 3.69 (d,  $J$  = 13.5 Hz, 2H), 2.47 (q,  $J$  = 15.1, 7.6 Hz, 2H), 2.22 (s, 6H), 2.21 (s, 3H), 1.08 (t,  $J$  = 7.6 Hz, 3H).  $^{13}\text{C}$  NMR (100 MHz,  $\text{CDCl}_3$ )  $\delta$  145.5, 141.8, 141.2, 140.2, 139.6, 135.7, 135.5, 134.7, 129.2, 128.8, 128.0, 128.0, 127.2, 81.4, 70.0, 69.8, 69.2, 69.1, 69.1, 28.6, 24.7, 21.4, 15.6. HRMS (APCI-TOF)  $m/z$ : [M] calcd for  $\text{C}_{35}\text{H}_{36}\text{FeSi}$ , 540.1936; found 540.1933;

HPLC: Chiralpak MD column (hexanes: isopropanol = 98.1:1.9, 0.5 mL/min, 211 nm, 96% ee).  $t_{\text{R}}$  = 24.455 (major),  $t_{\text{R}}$  = 31.760 min (minor).

**cyclopenta-2,4-dien-1-yl(3-((*E*)-2-((*S*)-mesityl(phenyl)silyl)-2-(naphthalen-2-yl)vinyl)cyclopenta-2,4-dien-1-yl)iron**



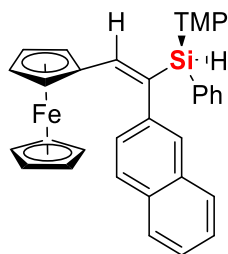

**9g**

**9g** was synthesized following the general procedure D. Reddish brown viscous oil (102.3 mg, 91% yield) purified by column chromatography (PE/EA= 100:1).  $[\alpha]_D^{20} = -32$  ( $c = 0.075$ ,  $\text{CHCl}_3$ ).  $^1\text{H NMR}$  (400 MHz,  $\text{CDCl}_3$ ):  $\delta$  7.71 – 7.61 (m, 3H), 7.52 – 7.48 (m, 3H), 7.33 – 7.31 (m, 2H), 7.00 – 6.93 (m, 4H), 6.77 (s, 2H), 6.72 (s, 1H) 5.48 (s, 1H), 3.95 (s, 5H), 3.90 (s, 2H), 3.69 (d,  $J = 14.8$  Hz, 2H), 2.26 (s, 6H), 2.20 (s, 3H).  $^{13}\text{C NMR}$  (100 MHz,  $\text{CDCl}_3$ )  $\delta$  145.6, 141.8, 140.9, 139.9, 135.8, 135.3, 134.6, 133.9, 132.1, 129.4, 128.9, 128.1, 128.03, 127.96, 127.8, 127.6, 127.1, 126.2, 125.9, 125.4, 81.4, 70.2, 70.1, 69.4, 69.3, 69.2, 24.8, 21.4. HRMS (APCI-TOF)  $m/z$ :  $[\text{M}]$  calcd for  $\text{C}_{37}\text{H}_{34}\text{FeSi}$ , 562.1779; found 562.1767; HPLC: Chiralpak MD column (hexanes: isopropanol = 98.1:1.9, 0.5 mL/min, 210 nm, 93% ee).  $t_R = 43.734$  (minor),  $t_R = 48.368$  min (major).

**cyclopenta-2,4-dien-1-yl(3-((*E*)-2-(4-fluorophenyl)-2-((*S*)-mesityl(phenyl)silyl)vinyl)cyclopenta-2,4-dien-1-yl)iron**

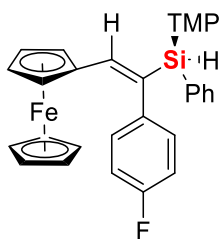

**9h**

**9h** was synthesized following the general procedure D. Reddish brown viscous oil (99.6 mg, 94% yield) purified by column chromatography (PE/EA= 100:1).  $[\alpha]_D^{20} = -16.51$  ( $c = 1.29$ ,  $\text{CHCl}_3$ ).  $^1\text{H NMR}$  (400 MHz,  $\text{CDCl}_3$ ):  $\delta$  7.45 (d,  $J = 7.7$  Hz, 2H), 7.26 – 7.19 (m, 3H), 6.99 – 6.95 (m, 2H), 6.88 – 6.83 (m, 2H), 6.75 (s, 2H), 6.66 (s, 1H), 5.38 (s, 1H), 3.97 – 3.94 (m, 7H), 3.69 (d,  $J = 13.5$  Hz, 2H), 2.23 (s, 6H), 2.18 (s, 3H).  $^{13}\text{C NMR}$  (100 MHz,  $\text{CDCl}_3$ )  $\delta$  162.7(d,  $J_{\text{C-F}} = 243$  Hz), 145.5, 142.0, 139.9,

138.9 (d,  $J_{C-F}$  = 3 Hz), 135.7, 134.4 (d,  $J_{C-F}$  = 9 Hz), 129.4, 128.9, 128.1, 126.8, 115.6, 115.4, 81.1, 70.0, 69.9, 69.4, 69.3, 69.2, 24.7, 21.4.  $^{19}\text{F}$  NMR (400 MHz,  $\text{CDCl}_3$ )  $\delta$  -116.9 (m). HRMS (APCI-TOF)  $m/z$ : [M] calcd for  $\text{C}_{33}\text{H}_{31}\text{FFeSi}$ , 530.1528; found 530.1525;

HPLC: Chiralpak MD column (hexanes: isopropanol = 98.1:1.9, 0.5 mL/min, 211 nm, 92% ee).  $t_R$  = 33.536 (major),  $t_R$  = 40.253 min (minor).

**cyclopenta-2,4-dien-1-yl(3-((*E*)-2-(4-isopropylphenyl)-2-((*S*)-mesityl(phenyl)silyl)vinyl)cyclopenta-2,4-dien-1-yl)iron**

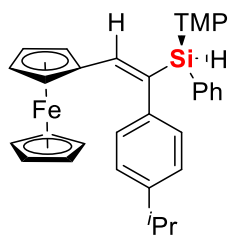

**9i**

**9i** was synthesized following the general procedure D. Reddish brown viscous oil (103.0 mg, 93% yield) purified by column chromatography (PE/EA= 100:1).  $[\alpha]_D^{20}$  = -15.92 ( $c$  = 0.76,  $\text{CHCl}_3$ ).  $^1\text{H}$  NMR (400 MHz,  $\text{CDCl}_3$ ):  $\delta$  7.44 (d,  $J$  = 7.8 Hz, 2H), 7.26 – 7.19 (m, 3H), 7.05 – 7.02 (m, 2H), 6.97 – 6.95 (m, 2H), 6.76 (s, 2H), 6.61 (s, 1H), 5.38 (s, 1H), 3.94 (s, 7H), 3.72 (d,  $J$  = 13.2 Hz, 2H), 2.77 (dt,  $J$  = 13.8, 6.9 Hz, 1H), 2.23 (s, 6H), 2.20 (s, 3H), 1.14 (d,  $J$  = 7.0 Hz, 6H).  $^{13}\text{C}$  NMR (100 MHz,  $\text{CDCl}_3$ )  $\delta$  146.6, 145.6, 141.2, 140.3, 139.7, 135.7, 135.6, 134.9, 129.2, 128.8, 128.0, 127.3, 126.5, 81.5, 70.0, 69.9, 69.2, 69.1, 33.8, 24.7, 24.2, 21.4. HRMS (APCI-TOF)  $m/z$ : [M] calcd for  $\text{C}_{36}\text{H}_{38}\text{FeSi}$ , 554.2092; found 554.2082;

HPLC: Chiralpak MD column (hexanes: isopropanol = 98.1:1.9, 0.5 mL/min, 210 nm, 95% ee).  $t_R$  = 19.722 (major),  $t_R$  = 24.578 min (minor).

**cyclopenta-2,4-dien-1-yl(3-((*E*)-2-((*S*)-mesityl(phenyl)silyl)-2-(4-(trifluoromethyl)phenyl)vinyl)cyclopenta-2,4-dien-1-yl)iron**

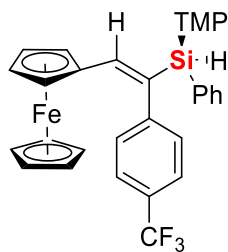

**9j**

**9j** was synthesized following the general procedure D. Reddish brown viscous oil (109 mg, 94% yield) purified by column chromatography (PE/EA= 100:1).  $[\alpha]_{\text{D}}^{20} = -27.11$  ( $c = 2.11$ ,  $\text{CHCl}_3$ ).  $^1\text{H NMR}$  (400 MHz,  $\text{CDCl}_3$ ):  $\delta$  7.47 – 7.41 (m, 4H), 7.28 – 7.20 (m, 3H), 7.13 (d,  $J = 8.2$  Hz, 2H), 6.76 (s, 2H), 6.69 (s, 1H), 5.38 (s, 1H), 3.98 (s, 2H), 3.95 (s, 5H), 3.67 (d,  $J = 14.5$  Hz, 2H), 2.23 (s, 6H), 2.19 (s, 3H).  $^{13}\text{C NMR}$  (100 MHz,  $\text{CDCl}_3$ )  $\delta$  147.4, 145.6, 142.4, 140.1, 135.7, 134.1, 134.0, 129.6, 129.0, 128.6, 128.2, 126.4, 124.5 (q,  $J_{\text{C-F}} = 271$  Hz), 125.5 (q,  $J_{\text{C-F}} = 4$  Hz), 80.8, 70.1, 69.9, 69.6, 69.6, 69.3, 24.7, 21.4.  $^{19}\text{F NMR}$  (400 MHz,  $\text{CDCl}_3$ )  $\delta$  -61.9 (m). HRMS (APCI-TOF)  $m/z$ : [M] calcd for  $\text{C}_{34}\text{H}_{31}\text{F}_3\text{FeSi}$ , 580.1497; found 580.1491; HPLC: Chiralpak MD column (hexanes: isopropanol = 98.1:1.9, 0.5 mL/min, 211 nm, 92% ee).  $t_{\text{R}} = 14.122$  (major),  $t_{\text{R}} = 17.064$  min (minor).

**(3-((*E*)-2-(4-bromophenyl)-2-((*S*)-mesityl(phenyl)silyl)vinyl)cyclopenta-2,4-dien-1-yl)(cyclopenta-2,4-dien-1-yl)iron**

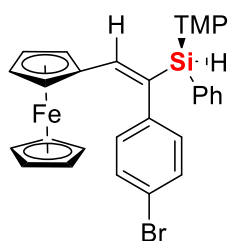

**9k**

**9k** was synthesized following the general procedure D. Reddish brown viscous oil (85.0 mg, 72% yield) purified by column chromatography (PE/EA= 100:1).  $[\alpha]_{\text{D}}^{20} = -29.17$  ( $c = 2.3075$ ,  $\text{CHCl}_3$ ).  $^1\text{H NMR}$  (400 MHz,  $\text{CDCl}_3$ ):  $\delta$  7.45 (d,  $J = 7.7$  Hz, 2H), 7.30 – 7.21 (m, 5H), 6.91 (d,  $J = 8.4$  Hz, 2H), 6.76 (s, 2H), 6.65 (s, 1H), 5.37 (s, 1H), 3.98 (s, 2H), 3.94 (s, 5H), 3.71 (d,  $J = 10.6$  Hz, 2H), 2.23 (s, 6H), 2.19 (s, 3H).  $^{13}\text{C NMR}$  (100 MHz,  $\text{CDCl}_3$ )  $\delta$  145.5, 142.2, 142.0, 140.0, 135.7, 134.1, 131.7, 130.0,

129.5, 128.9, 128.1, 126.6, 120.0, 81.0, 70.1, 69.9, 69.5, 69.4, 69.2, 24.7, 21.4. HRMS (APCI-TOF) m/z: [M] calcd for C<sub>33</sub>H<sub>31</sub>BrFeSi, 590.0728; found 590.0719; HPLC: Chiralpak MD column (hexanes: isopropanol = 98.1:1.9, 0.5 mL/min, 210 nm, 96% ee). t<sub>R</sub> = 33.680 (major), t<sub>R</sub> = 40.114 min (minor).

**cyclopenta-2,4-dien-1-yl(3-((*E*)-2-((*S*)-mesityl(phenyl)silyl)-2-(4-methoxyphenyl)vinyl)cyclopenta-2,4-dien-1-yl)iron**

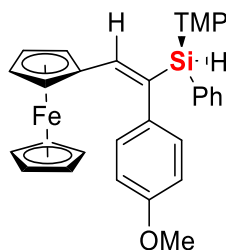

**9I**

**9I** was synthesized following the general procedure D. Reddish brown viscous oil (100.8 mg, 93% yield) purified by column chromatography (PE/EA= 100:1). [ $\alpha$ ]<sub>D</sub><sup>20</sup> = -8.18 (c = 1.5975, CHCl<sub>3</sub>). <sup>1</sup>H NMR (400 MHz, CDCl<sub>3</sub>):  $\delta$  7.46 (d, *J* = 7.5 Hz, 2H), 7.26 – 7.19 (m, 3H), 6.97 – 6.95 (m, 2H), 6.75 – 6.71 (m, 4H), 6.62 (s, 1H), 5.38 (s, 1H), 3.98 – 3.94 (m, 7H), 3.73 (d, *J* = 10.5 Hz, 2H), 3.65 (s, 3H), 2.24 (s, 6H), 2.19 (s, 3H). <sup>13</sup>C NMR (100 MHz, CDCl<sub>3</sub>)  $\delta$  158.0, 145.5, 141.4, 139.7, 135.7, 135.2, 135.1, 134.7, 129.3, 129.2, 128.8, 128.0, 127.2, 114.0, 81.5, 70.0, 69.9, 69.2, 69.2, 55.2, 24.7, 21.4. HRMS (APCI-TOF) m/z: [M] calcd for C<sub>34</sub>H<sub>34</sub>OFeSi, 542.1728; found 542.1725; HPLC: Chiralpak MD column (hexanes: isopropanol = 98.1:1.9, 0.5 mL/min, 211 nm, 94% ee). t<sub>R</sub> = 25.037 (major), t<sub>R</sub> = 42.816 min (minor).

**cyclopenta-2,4-dien-1-yl(3-((*E*)-2-((*R*)-mesityl(phenyl)silyl)-2-(thiophen-2-yl)vinyl)cyclopenta-2,4-dien-1-yl)iron**

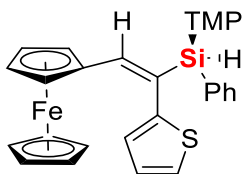

**9m**

**9m** was synthesized following the general procedure D. Reddish brown viscous oil (95.3 mg, 92% yield) purified by column chromatography (PE/EA= 100:1).  $[\alpha]_D^{20} = -58.86$  ( $c = 0.88$ ,  $\text{CHCl}_3$ ).  $^1\text{H}$  NMR (400 MHz,  $\text{CDCl}_3$ ):  $\delta$  7.48 (d,  $J = 7.5$  Hz, 2H), 7.27 – 7.20 (m, 3H), 7.04 (d,  $J = 5.3$  Hz, 1H), 6.80 (t,  $J = 3.9$  Hz, 1H), 6.75 (s, 2H), 6.63 (d,  $J = 3.8$  Hz, 1H), 5.41 (s, 1H), 4.02 (s, 2H), 3.95 (s, 5H), 3.88 (d,  $J = 8.8$  Hz, 2H), 2.26 (s, 6H), 2.18 (s, 3H).  $^{13}\text{C}$  NMR (100 MHz,  $\text{CDCl}_3$ )  $\delta$  158.0, 145.5, 141.4, 139.7, 135.7, 135.2, 135.1, 134.7, 129.3, 129.2, 128.8, 128.0, 127.2, 114.0, 81.5, 70.0, 69.9, 69.2, 69.2, 55.2, 24.7, 21.4. HRMS (APCI-TOF)  $m/z$ :  $[\text{M}]$  calcd for  $\text{C}_{31}\text{H}_{30}\text{FeSSi}$ , 518.1187; found 518.1180; HPLC: Chiralpak MD column (hexanes: isopropanol = 98.1:1.9, 0.9 mL/min, 211 nm, 90% ee).  $t_R = 18.015$  (major),  $t_R = 35.574$  min (minor).

**cyclopenta-2,4-dien-1-yl(3-((*E*)-2-((*S*)-mesityl(phenyl)silyl)-2-(pyridin-3-yl)vinyl)cyclopenta-2,4-dien-1-yl)iron**

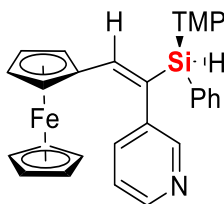

**9n**

**9n** was synthesized following the general procedure D. Reddish brown viscous oil (66.7 mg, 65% yield) purified by column chromatography (PE/EA= 100:1).  $[\alpha]_D^{20} = -15.54$  ( $c = 1.1775$ ,  $\text{CHCl}_3$ ).  $^1\text{H}$  NMR (400 MHz,  $\text{CDCl}_3$ ):  $\delta$  8.32 (d,  $J = 8.4$  Hz, 2H), 7.48 (d,  $J = 6.6$  Hz, 2H), 7.32 – 7.26 (m, 4H), 7.09 (t,  $J = 12.9$  Hz, 1H), 6.77 (s, 2H), 6.75 (s, 1H), 5.40 (s, 1H), 4.01 (s, 2H), 3.98 (s, 5H), 3.68 (d,  $J = 13.4$  Hz, 2H), 2.24 (s, 6H), 2.21 (s, 3H).  $^{13}\text{C}$  NMR (100 MHz,  $\text{CDCl}_3$ )  $\delta$  149.1, 147.2, 145.5, 143.4, 140.1, 135.7, 133.7, 131.2, 129.6, 129.0, 128.2, 126.1, 123.4, 80.7, 70.0, 69.8, 69.6,

69.6, 69.4, 69.2, 24.7, 21.3. HRMS (APCI-TOF) m/z: [M] calcd for C<sub>32</sub>H<sub>31</sub>FeNSi, 514.1648; found 514.1648;

HPLC: Chiralpak MD column (hexanes: isopropanol = 95:5, 0.5 mL/min, 211 nm, 90% ee). t<sub>R</sub> = 5.042 (major), t<sub>R</sub> = 5.470 min (minor).

### 2.3.2 Synthetic applications of Si-stereogenic monohydrosilane **3a**

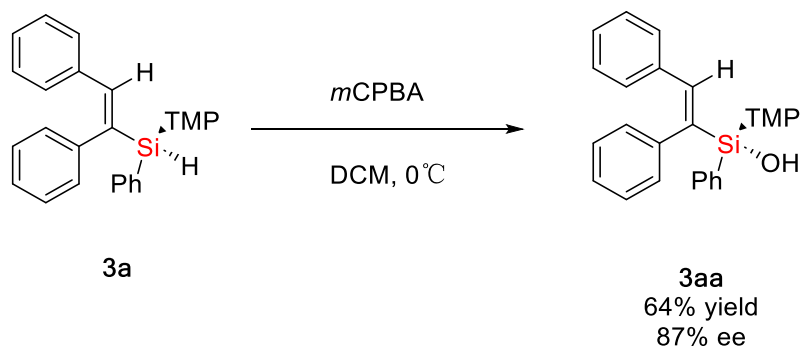

To a flame dried 25 mL Schlenk tube, a solution of **3a** (40.4 mg, 0.1 mmol, 1M) in DCM (1 mL) was cooled to 0 °C, and *m*CPBA (34.4mg, 0.2 mmol) was added to the solution under N<sub>2</sub> atmosphere. After the reaction was completed, the resulting solution was concentrated and purified by preparative thin-layer chromatography using petroleum ether as the eluent to afford colorless liquid **3aa** (26.88mg, 64% yield, 87% ee).  $[\alpha]_{\text{D}}^{20} = 24.65$  ( $c = 0.215$ , CHCl<sub>3</sub>). <sup>1</sup>H NMR (400 MHz, CDCl<sub>3</sub>)  $\delta$  7.55 (d,  $J = 8.0$  Hz, 2H), 7.30 – 7.22 (m, 3H), 7.15 – 7.07 (m, 3H), 7.03 - 6.99 (m, 5H), 6.90 – 6.86 (m, 3H), 6.76 (s, 2H), 2.24 (s, 6H), 2.21 (s, 3H), 1.44 (brs, 1H). <sup>13</sup>C NMR (100 MHz, CDCl<sub>3</sub>)  $\delta$  145.6, 143.2, 141.6, 141.2, 140.0, 138.1, 137.2, 135.0, 129.9, 129.8, 129.4, 128.9, 128.4, 128.3, 128.2, 128.0, 127.6, 126.4, 25.1, 21.3. HRMS (ESI  $m/z$  Calcd for C<sub>29</sub>H<sub>28</sub>OSi [M+K]<sup>+</sup>: 459.1541 found: 459.1531.

HPLC: Chiralpa AD-H column (hexanes: isopropanol = 99.7:0.3, 0.8 mL/min, 254 nm, 87% ee).  $t_{\text{R}} = 6.659$  min (major),  $t_{\text{R}} = 4.951$  min (minor)

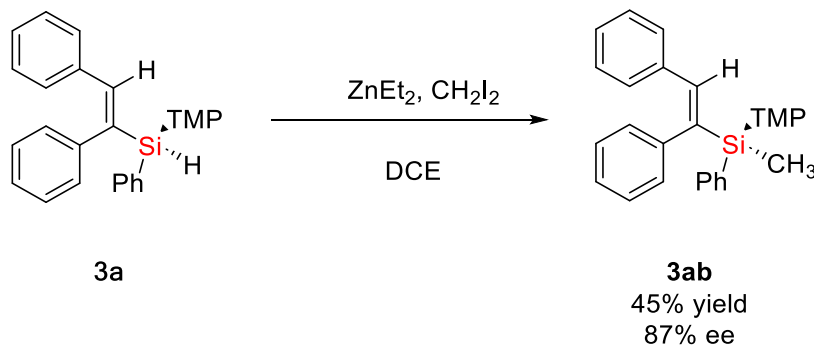

To a flame dried 25 mL Schlenk tube, a solution of **3a** (40.4 mg, 0.1 mmol, 1M) in DCE (2 ml) was cooled to 0 °C, and Et<sub>2</sub>Zn (0.8 mL, 0.8 mmol) was added to the

solution under N<sub>2</sub> atmosphere. After that, CH<sub>2</sub>l<sub>2</sub> (428.5 mg, 1.6 mmol) was added dropwise. The reaction was kept at 0 °C for 20 min and warmed to room temperature for 36 h. After the reaction was completed, the reaction mixture was cooled to 0 °C and the saturated aqueous solution of NH<sub>4</sub>Cl was added. The aqueous phase was then extracted by DCM. The organic layer was washed with brine and dried over anhydrous Na<sub>2</sub>SO<sub>4</sub>. The resulting solution was concentrated and purified by preparative thin-layer chromatography using petroleum ether as the eluent to afford colorless liquid **3ab** (mg, 45% yield, 87% ee). [ $\alpha$ ]<sub>D</sub><sup>20</sup> = 14.3 (c = 0.14, CHCl<sub>3</sub>). <sup>1</sup>H NMR (400 MHz, CDCl<sub>3</sub>)  $\delta$  7.50 (d, *J* = 7.9 Hz, 2H), 7.31 – 7.22 (m, 3H), 7.16 – 6.93 (m, 7H), 6.93 – 6.88 (m, 3H), 6.80 (s, 1H), 6.78 (s, 2H), 2.23 – 2.18 (m, 9H), 0.48 (s, 3H). <sup>13</sup>C NMR (100 MHz, CDCl<sub>3</sub>)  $\delta$  145.8, 144.4, 142.3, 140.5, 140.0, 139.4, 137.7, 135.9, 135.3, 129.9, 129.7, 129.5, 129.3, 129.1, 128.9, 128.8, 128.7, 128.1, 128.0, 127.2, 126.0, 25.7, 21.2, 1.5. HRMS (ESI *m/z* Calcd for C<sub>30</sub>H<sub>30</sub>Si [M +Na]<sup>+</sup>: 441.2031 found: 441.2009.

HPLC: Chiralpa MD column (hexanes: isopropanol = 99.9:0.1, 0.5 mL/min, 254 nm, 87% ee). *t<sub>R</sub>* = 10.350 min (minor), *t<sub>R</sub>* = 11.103 min (major).

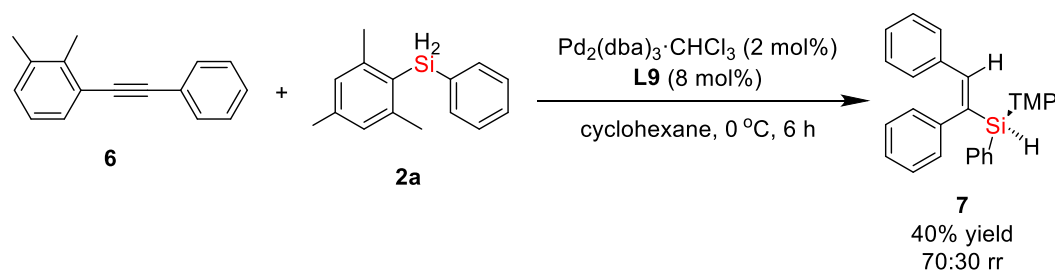

$\text{Pd}_2(\text{dba})_3 \cdot \text{CHCl}_3$  (4.1 mg, 2 mol%), **L9** (11.2 mg, 8 mol%) and diarylacetylene **6** (2 mmol) and **2a** (2 mmol) were added to a 10 mL flask, and 1 mL cyclohexane was added to above mixtures under a nitrogen atmosphere, then the reaction was stirred at 0 °C for 6 hours. After the reaction is complete, the mixture is passed through a short celite pad with DCM as the solvent. Then the mixture was concentrated in vacuum and purified by flash column chromatography (PE/EA = 70:1) to obtain the desired product **7** (40% yield, 70: 30 *rr*).



## 2.4 Gram-scale synthesis of 3a

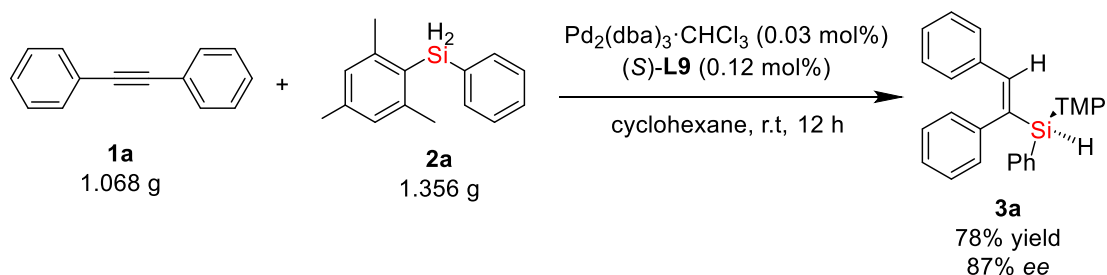

$\text{Pd}_2(\text{dba})_3 \cdot \text{CHCl}_3$  (2.0 mg, 0.03 mol%), **L9** (6 mg, 0.12 mol%), diphenylacetylene **1a** (1.068 g, 6 mmol), and **2a** (1.356 g, 6 mmol) were added to a 100 mL flask, and 10 mL cyclohexane was added to above mixtures under a nitrogen atmosphere, then the reaction was stirred at room temperature for 12 hours. After the reaction is complete, the mixture is passed through a short celite pad with DCM as the solvent. Then the mixture was concentrated in vacuum and purified by flash column chromatography (PE/EA = 70:1) to obtain the desired product **3a** (1.89 g, 78% yield, 87% ee).

## 2.5 The effect of P-ligand on the configuration of product

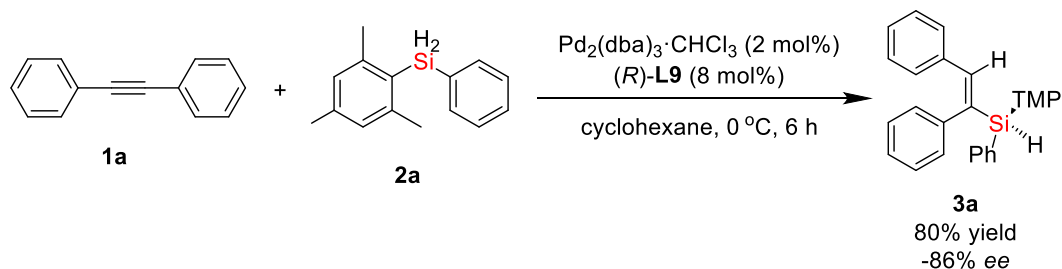

In a flame dried Schlenk tube,  $\text{Pd}_2(\text{dba})_3 \cdot \text{CHCl}_3$  (4.1 mg, 0.004 mmol, 2 mol%), (*R*)-**L9** (11.2 mg, 0.016 mmol, 8 mol%) in cyclohexane (1 mL, 0.2 M) was stirred at room temperature for 30 min under nitrogen atmosphere. Then **1a** (35.6mg, 0.2 mmol, 1 equiv), **2a** (45.2mg, 0.2 mmol, 1 equiv) were added sequentially to the reaction mixture, and the reaction tube was cooled at rt and then stirred for 6 h. After completion of the reaction, the mixture was passed through a short celite pad using DCM as a solvent. The mixture was then concentrated in vacuo and purified by column chromatography using PE and EA (70:1) to give the desired product **3a** (80% yield, 86% ee) in good yields.

## 2.6 Synthesis of chiral poly(vinylsilane) **5** bearing Si-stereogenic center

### 2.6.3 Preparation of Polyalkyne **4**

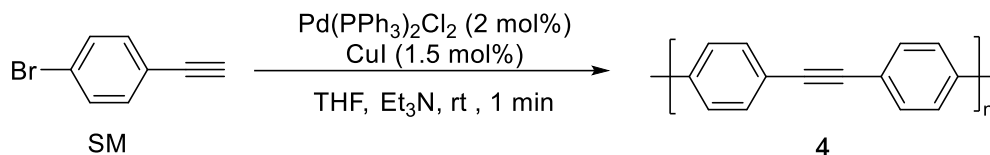

2 mol% palladium catalyst was added to the reaction tube, and 1.5 mol% cuprous iodide and iodide were then added, triethylamine or tetrahydrofuran was added as solvent, the deoxidation operation was performed for 2 minutes, and 3 equiv triethylamine and acetylene as reactants were added, stirring at room temperature for 1 min. The reaction needs to be precipitated with methanol, pumped and filtered, and dried in a vacuum drying oven for 10 hours.

### 2.6.4 Synthesis of chiral poly(vinylsilane) **5** via Pd-catalyzed hydrosilylation

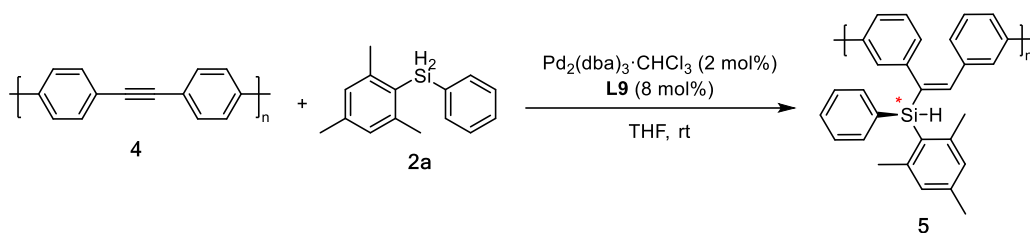

In a flame dried Schlenk tube, Pd<sub>2</sub>(dba)<sub>3</sub>·CHCl<sub>3</sub> (4.1 mg, 0.004 mmol, 2 mol%), L9 (11.2 mg, 0.016 mmol, 8 mol%) in THF (1 mL, 0.2 M) was stirred at room temperature for 30 min under nitrogen atmosphere. Then polyalkyne **4** (0.1 mmol, 0.5 equiv.), dihydrosilane **2a** were added sequentially to the reaction mixture, and the reaction tube was cooled at 0 °C and then stirred for 6 h. After completion of the reaction, the mixture was passed through a short celite pad using DCM as a solvent. The reaction needs to be precipitated with methanol, pumped and filtered, and dried in a vacuum drying oven for 10 hours.

### 2.6.5 CD spectra of poly(vinylsilane) **5**

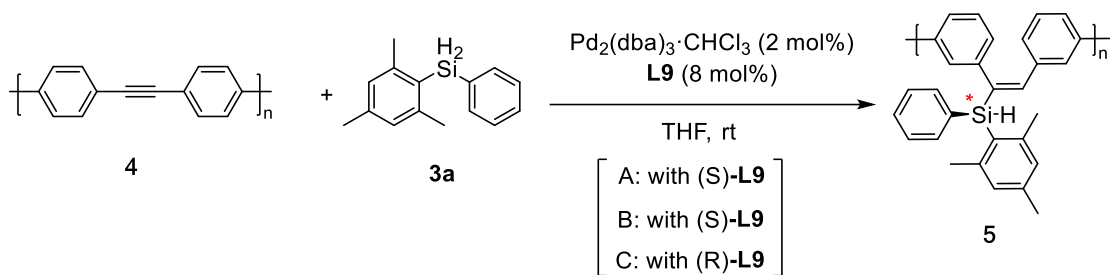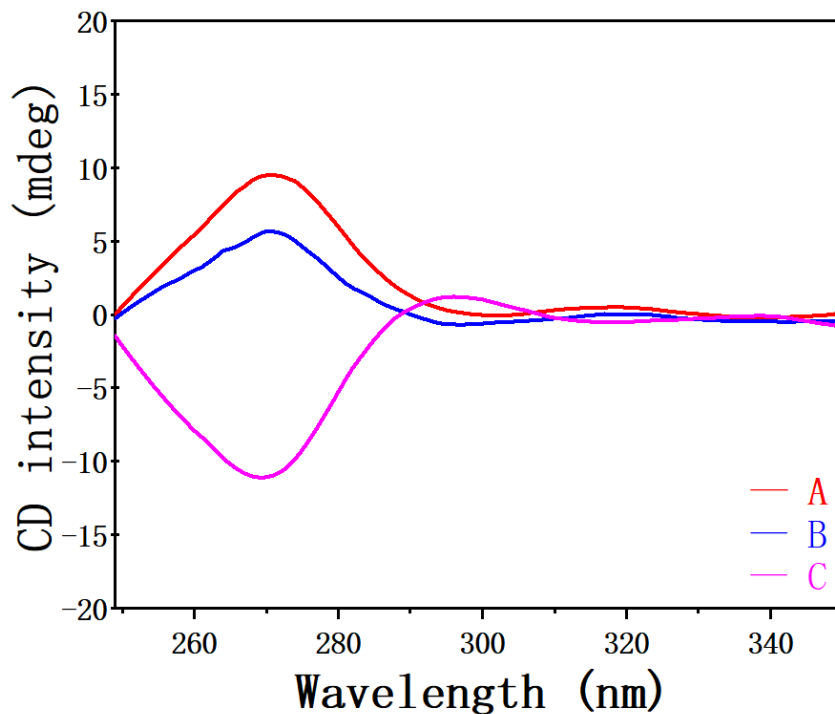

**Figure S1.** Circular dichroism spectroscopy analysis intensity spectra of (A) a diluted THF solution of the chiral polymer **5** (1 g/L in THF); (B) a diluted THF solution of the chiral polymer **5** (0.6 g/L in THF); (C) a diluted THF solution of the chiral polymer **5** (1 g/L in THF).

### 2.6.6 SEM images of polyalkyne 4 and poly(vinylsilane) 5

Polyalkyne (4)

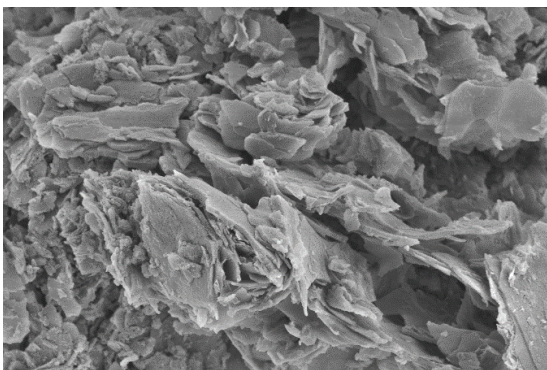

Figure S2. SEM images of 4

Chiral Poly(vinylsilane) (5)

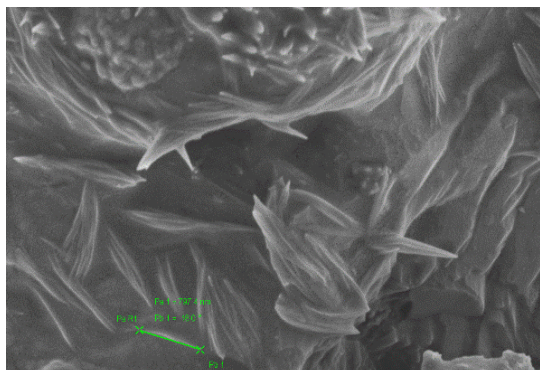

Figure S3. SEM images of 5.

### 2.6.7 TG analysis of polyalkyne 4 and poly(vinylsilane) 5

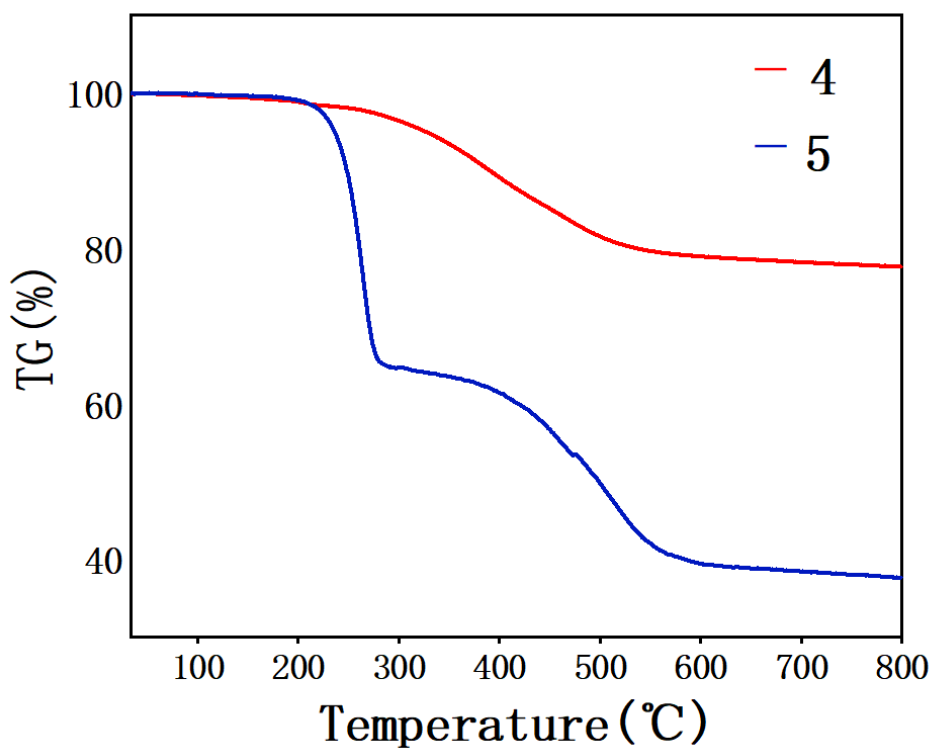

Figure S4. TGA (solid line) curves of 4 and 5 with a heating rate of 10 °C min<sup>-1</sup> under N<sub>2</sub>.

## 2.7 Kinetic studies for the Pd-catalyzed hydrosilylation of **1a** and **2a**

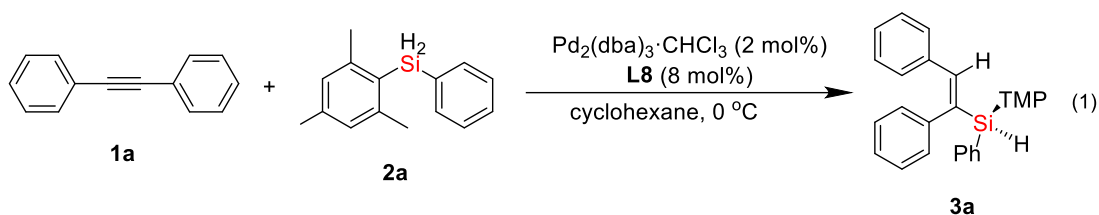

In a flame dried Schlenk tube,  $\text{Pd}_2(\text{dba})_3 \cdot \text{CHCl}_3$  (4.1 mg, 0.004 mmol, 2 mol%), **L8** (11.2 mg, 0.016 mmol, 8 mol%) in cyclohexane (1 mL, 0.2 M) was stirred at room temperature for 30 min under nitrogen atmosphere. Then diaryl alkyne **1a** (0.2 mmol, 1 equiv), **2a** (0.2 mmol, 1 equiv) were added sequentially to the reaction mixture, and the reaction tube was cooled at 0 °C. Then, the yield is measured by GC.

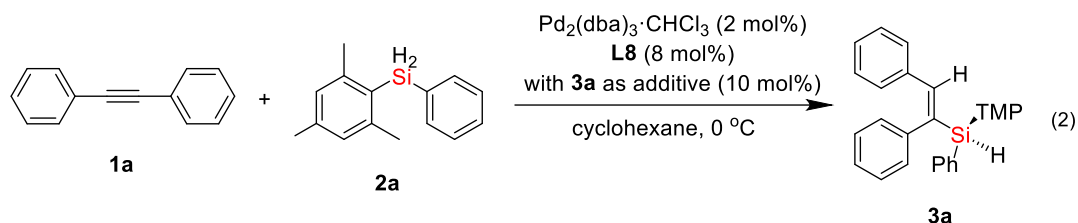

In a flame dried Schlenk tube,  $\text{Pd}_2(\text{dba})_3 \cdot \text{CHCl}_3$  (4.1 mg, 0.004 mmol, 2 mol%), **L8** (11.2 mg, 0.016 mmol, 8 mol%) in cyclohexane (1 mL, 0.2 M) was stirred at room temperature for 30 min under nitrogen atmosphere. Then **3a** (0.02 mmol, 10 mol%), **1a** (0.2 mmol, 1 equiv), **2a** (0.2 mmol, 1 equiv) were added sequentially to the reaction mixture, and the reaction tube was cooled at 0 °C. Then, the yield is measured by GC (The data for additive **3a** has been deducted).

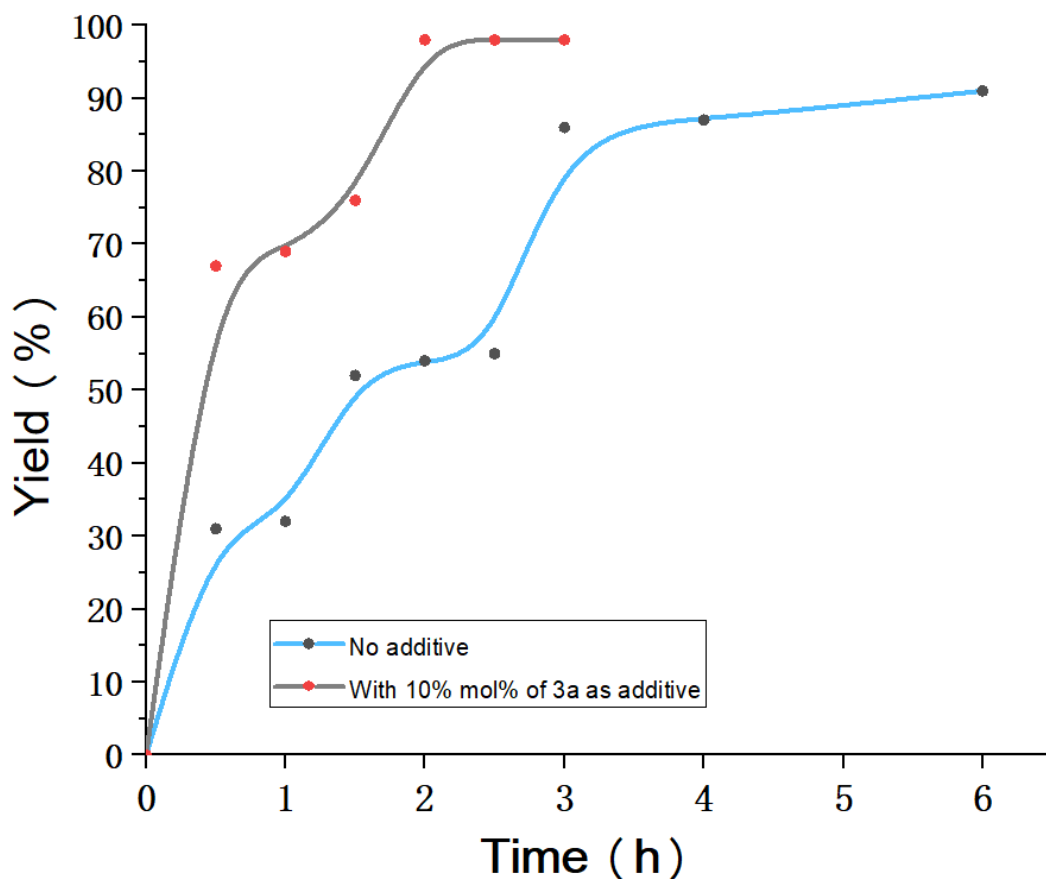

**Figure S5.** Kinetic studies for the Pd-catalyzed hydrosilylation of **1a** with **2a** with or without **3a** (10 mol%) as additive.

## 2.8 Experiments for non-linear effect

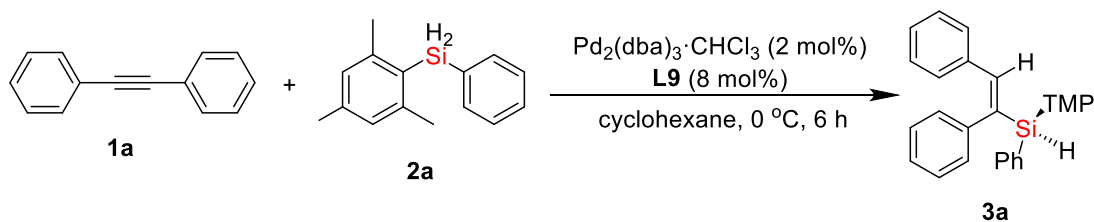

In a flame dried Schlenk tube,  $\text{Pd}_2(\text{dba})_3 \cdot \text{CHCl}_3$  (4.1 mg, 0.004 mmol, 2 mol%), **L9** (set 0%, 20%, 40%, 60%, 80%, 100%) in cyclohexane (1 mL, 0.2 M) was stirred at room temperature for 30 min under nitrogen atmosphere. Then diphenylacetylene **1a** (35.6mg, 0.2 mmol, 1 equiv.), **2a** (45.2mg, 0.2 mmol, 1 equiv) were added sequentially to the reaction mixture, and the reaction tube was cooled at room temperature and then stirred for 6 h. After completion of the reaction, the mixture

was passed through a short celite pad using DCM as a solvent. The mixture was then concentrated in vacuo and purified by column chromatography using PE and EA (70:1).

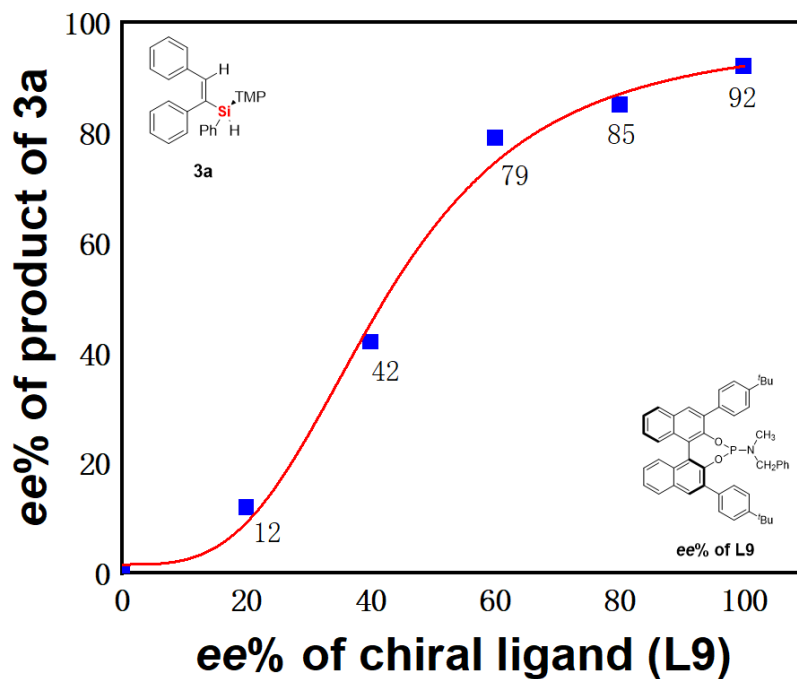

**Figure S6.** The study of possible NLE in the Pd-catalyzed hydrosilylation

## 2.9 DFT calculations for the ECD spectrum of chiral product 3a.

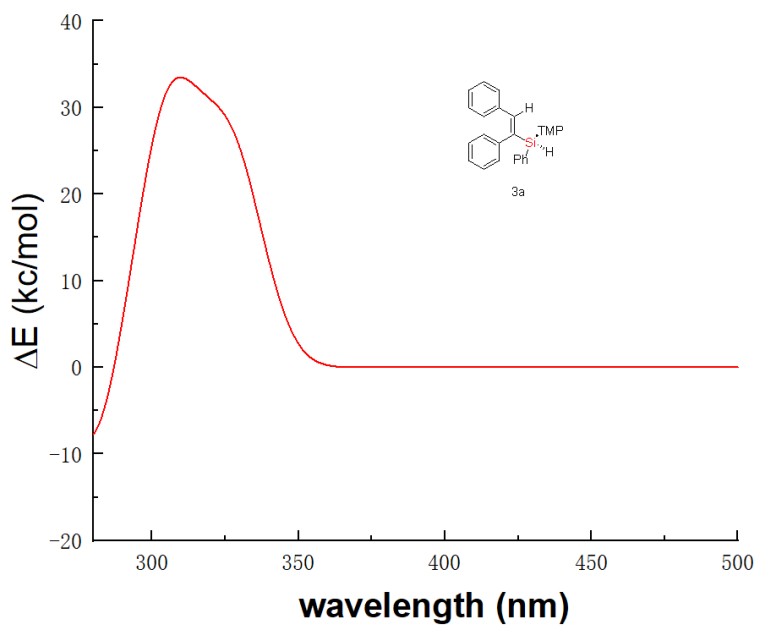

(a) Calculated result

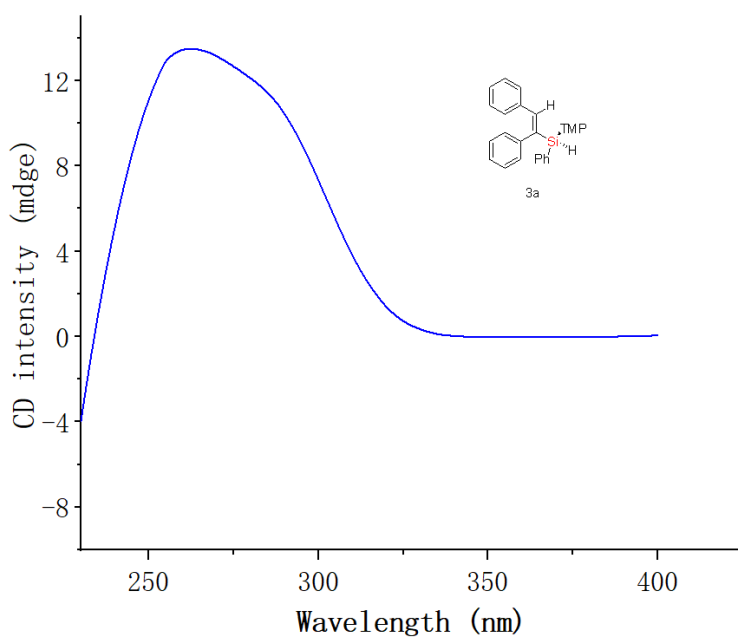

(b) Experimental result



## 2.10 X-Ray Structure of 9e

Single crystals of **9e** were obtained by recrystallization from THF. The molecular structure and X-ray diffraction data/refinement of **9e** were shown below. (CCDC:2380481)

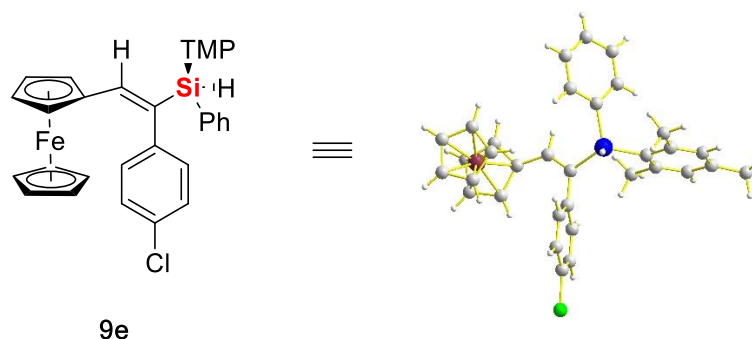

|                                    |                                               |
|------------------------------------|-----------------------------------------------|
| Empirical formula                  | C <sub>33</sub> H <sub>31</sub> ClFeSi        |
| Formula weight                     | 546.97                                        |
| Temperature/K                      | 170.00                                        |
| Crystal system                     | orthorhombic                                  |
| Space group                        | P2 <sub>1</sub> 2 <sub>1</sub> 2 <sub>1</sub> |
| a/Å                                | 7.7294(4)                                     |
| b/Å                                | 9.1256(4)                                     |
| c/Å                                | 38.7823(17)                                   |
| α/°                                | 90                                            |
| β/°                                | 90                                            |
| γ/°                                | 90                                            |
| Volume/Å <sup>3</sup>              | 2735.5(2)                                     |
| Z                                  | 4                                             |
| ρ <sub>calc</sub> /cm <sup>3</sup> | 1.328                                         |
| μ/mm <sup>-1</sup>                 | 4.016                                         |
| F(000)                             | 1144.0                                        |
| Crystal size/mm <sup>3</sup>       | 0.07 × 0.06 × 0.04                            |
| Radiation                          | GaKα (λ = 1.34139)                            |

---

|                                                  |                                                               |
|--------------------------------------------------|---------------------------------------------------------------|
| 2 $\theta$ range for data collection/ $^{\circ}$ | 7.934 to 114.42                                               |
| Index ranges                                     | $-9 \leq h \leq 9, -11 \leq k \leq 11, -48 \leq l \leq 48$    |
| Reflections collected                            | 54369                                                         |
| Independent reflections                          | 5609 [ $R_{\text{int}} = 0.0824, R_{\text{sigma}} = 0.0700$ ] |
| Data/restraints/parameters                       | 5609/0/329                                                    |
| Goodness-of-fit on $F^2$                         | 1.044                                                         |
| Final R indexes [ $I \geq 2\sigma(I)$ ]          | $R_1 = 0.0305, wR_2 = 0.0703$                                 |
| Final R indexes [all data]                       | $R_1 = 0.0350, wR_2 = 0.0717$                                 |
| Largest diff. peak/hole / $e \text{ \AA}^{-3}$   | 0.24/-0.26                                                    |
| Flack parameter                                  | 0.010(5)                                                      |

---

### 3 NMR Spectra

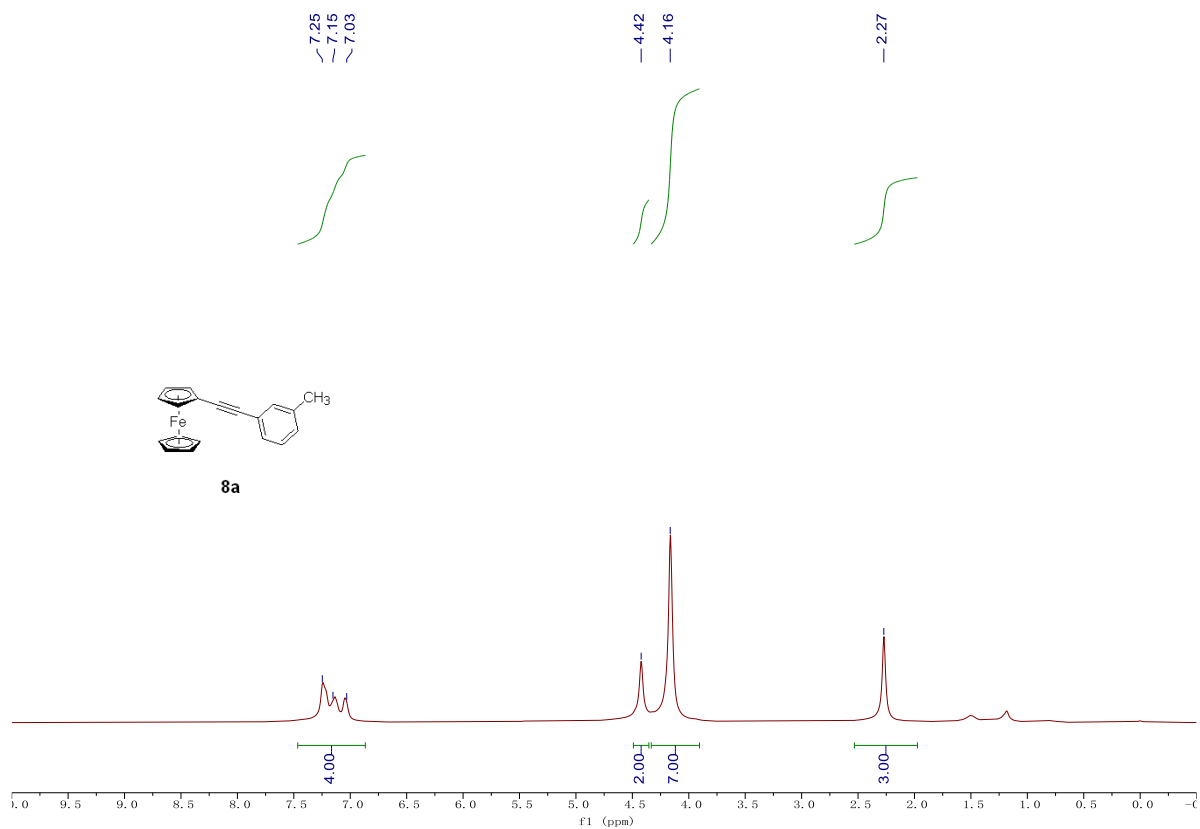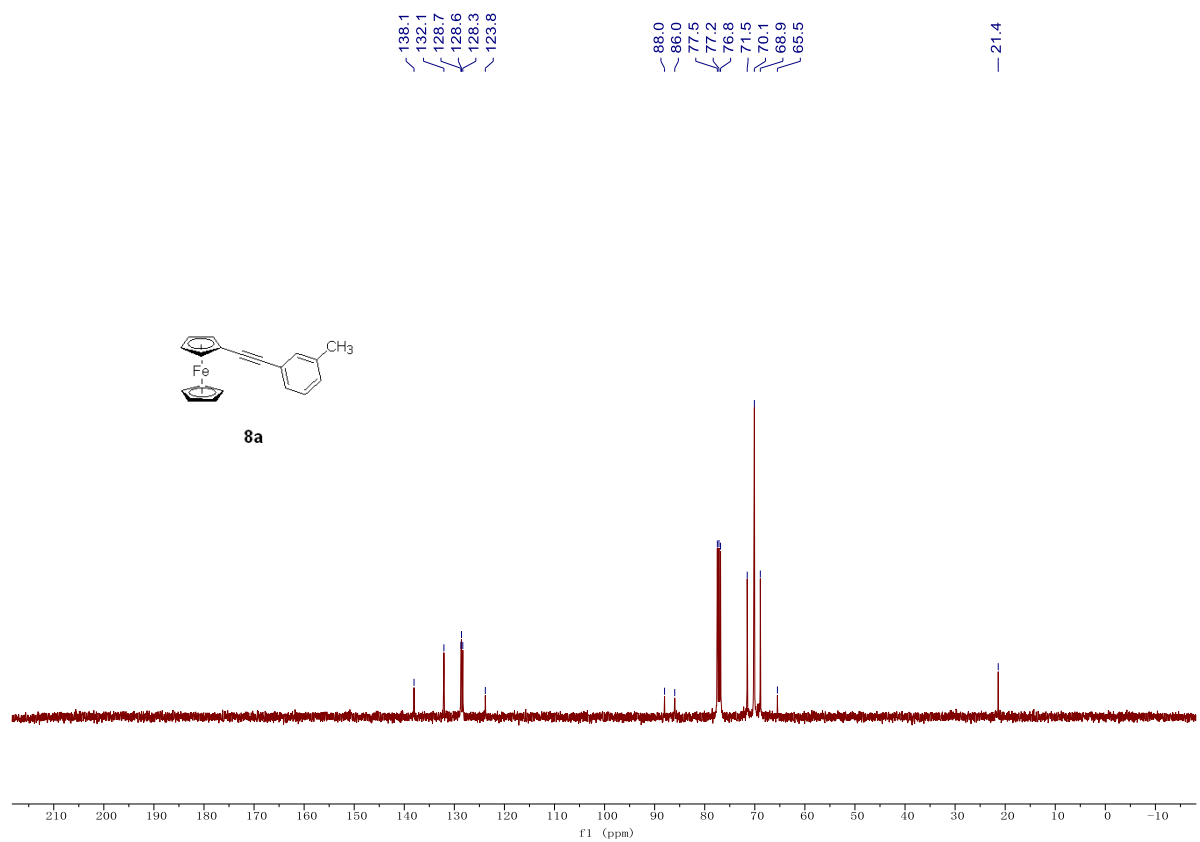

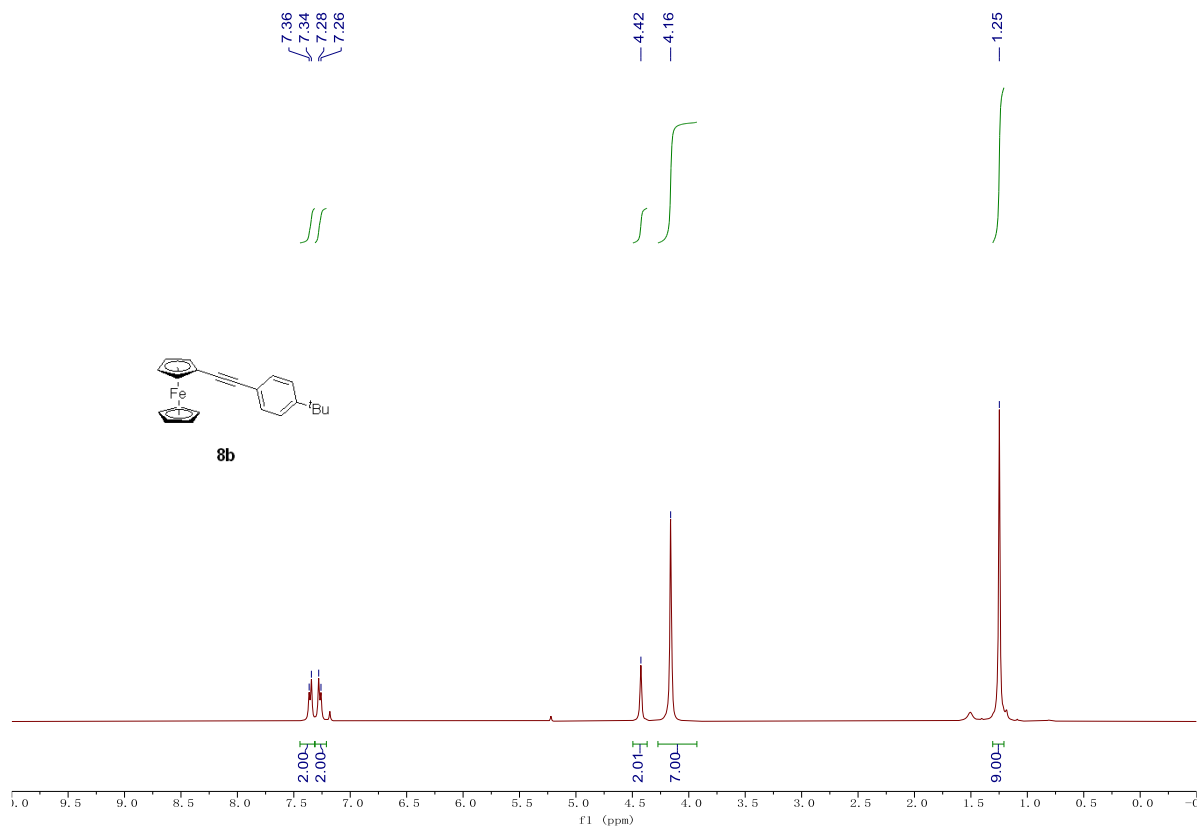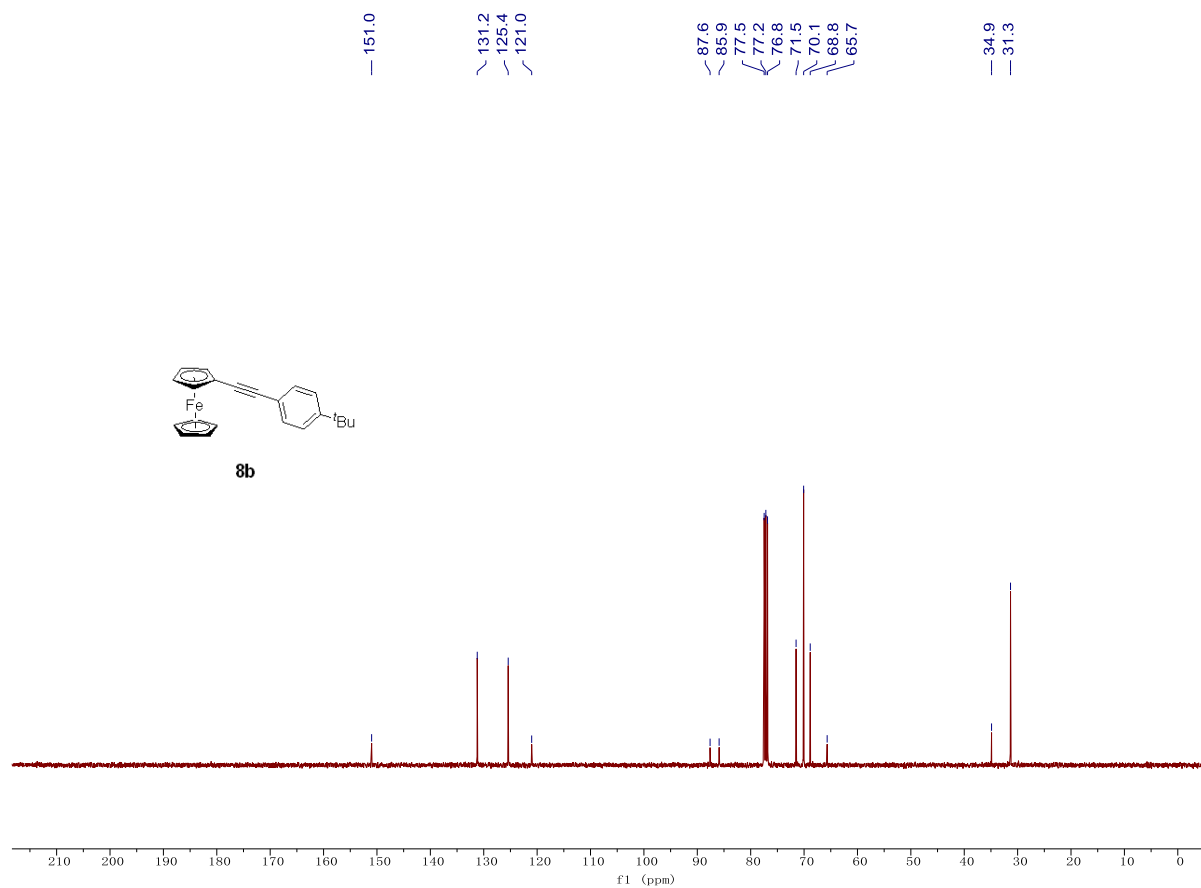

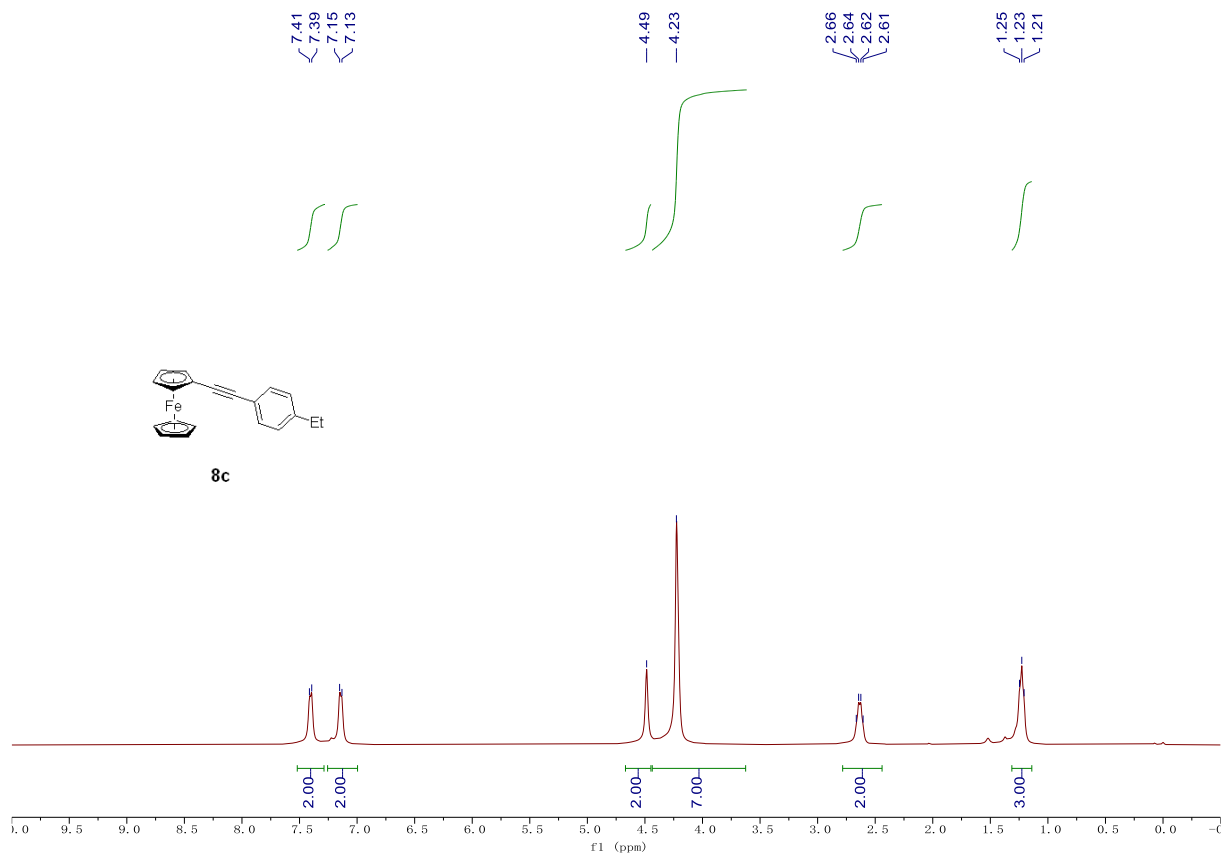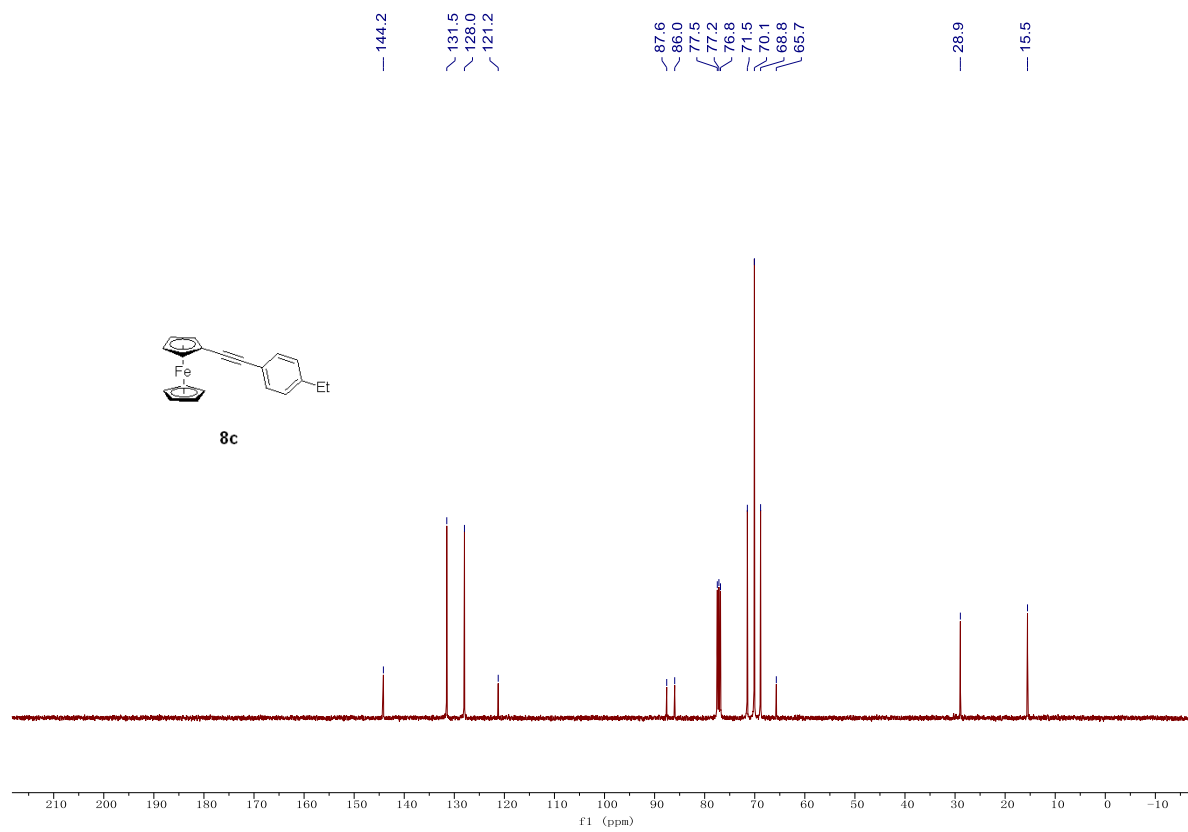

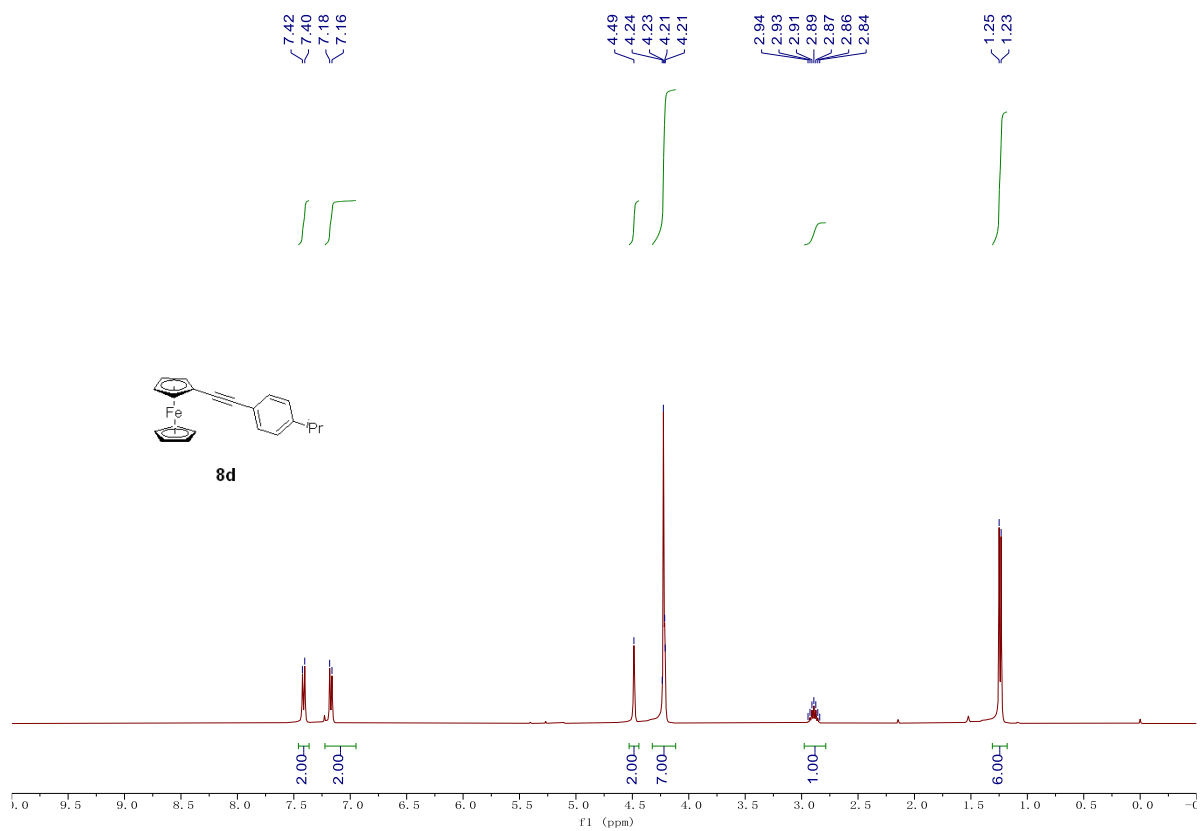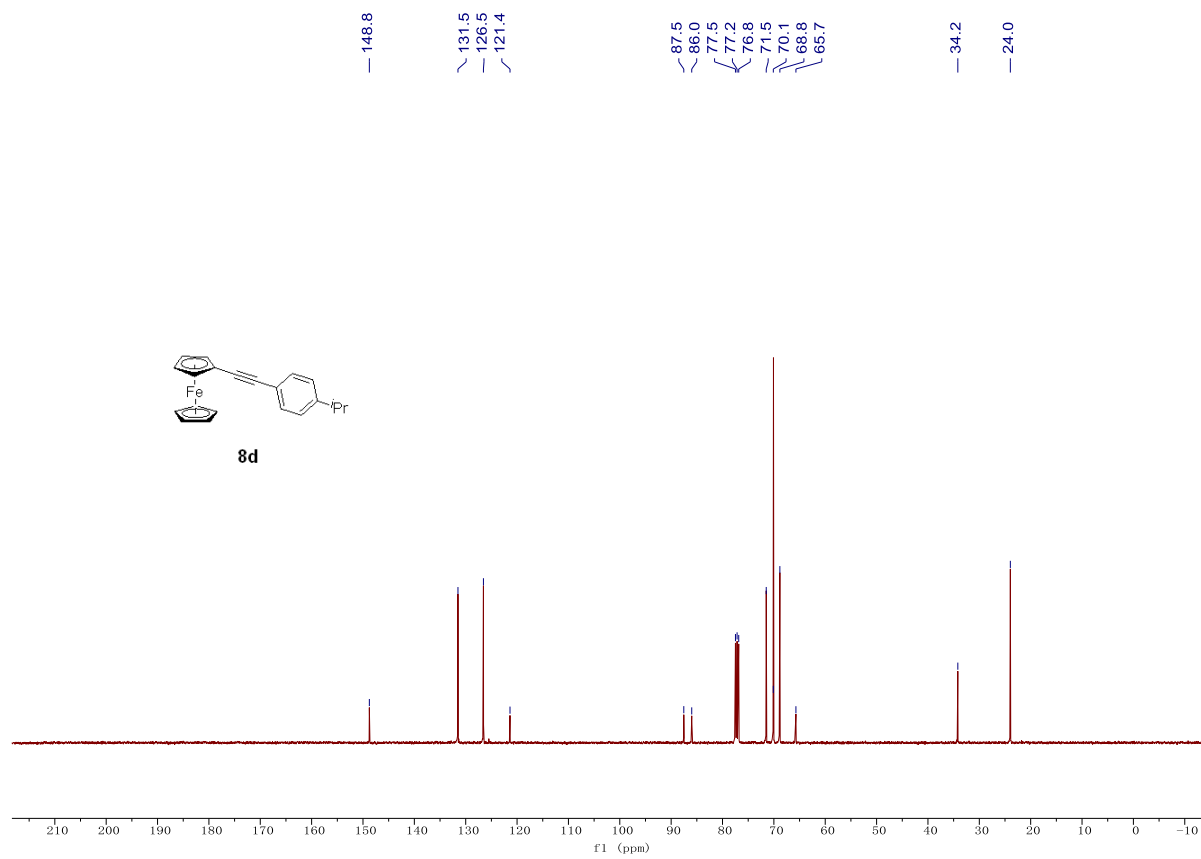

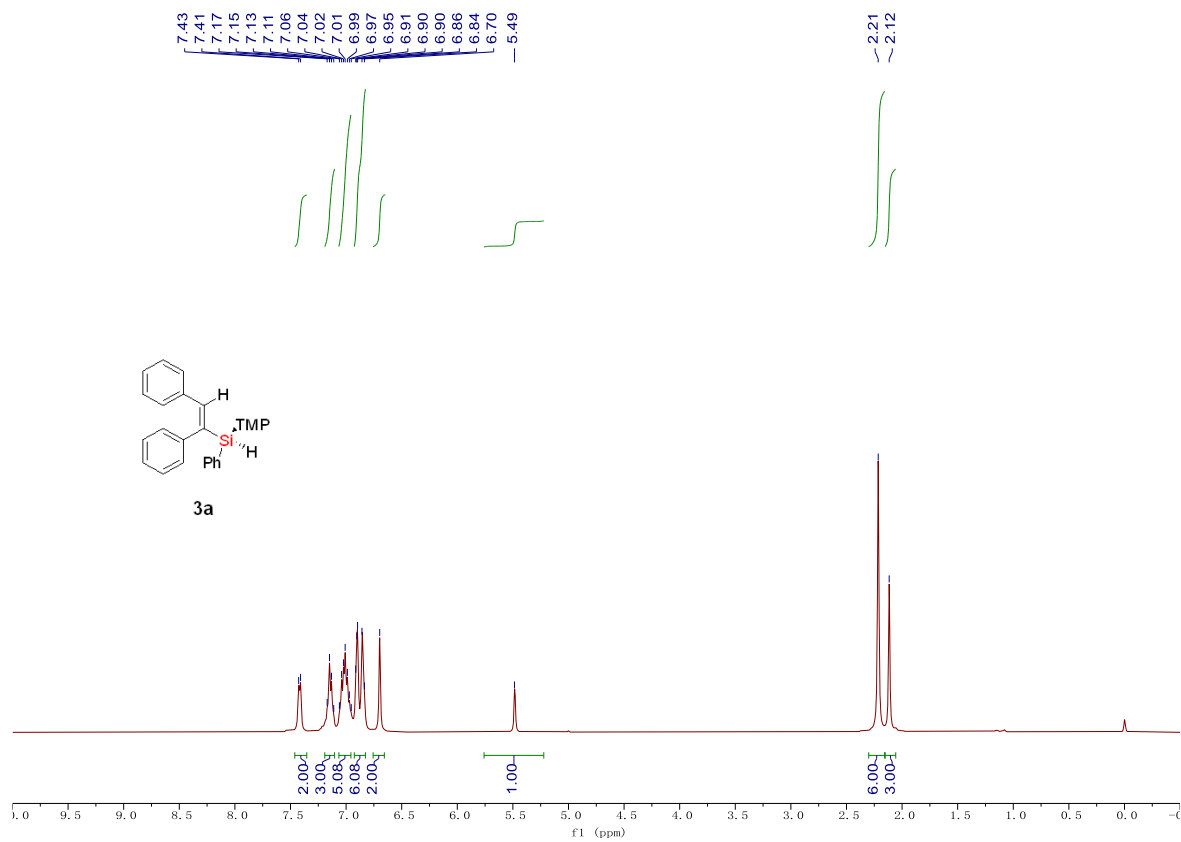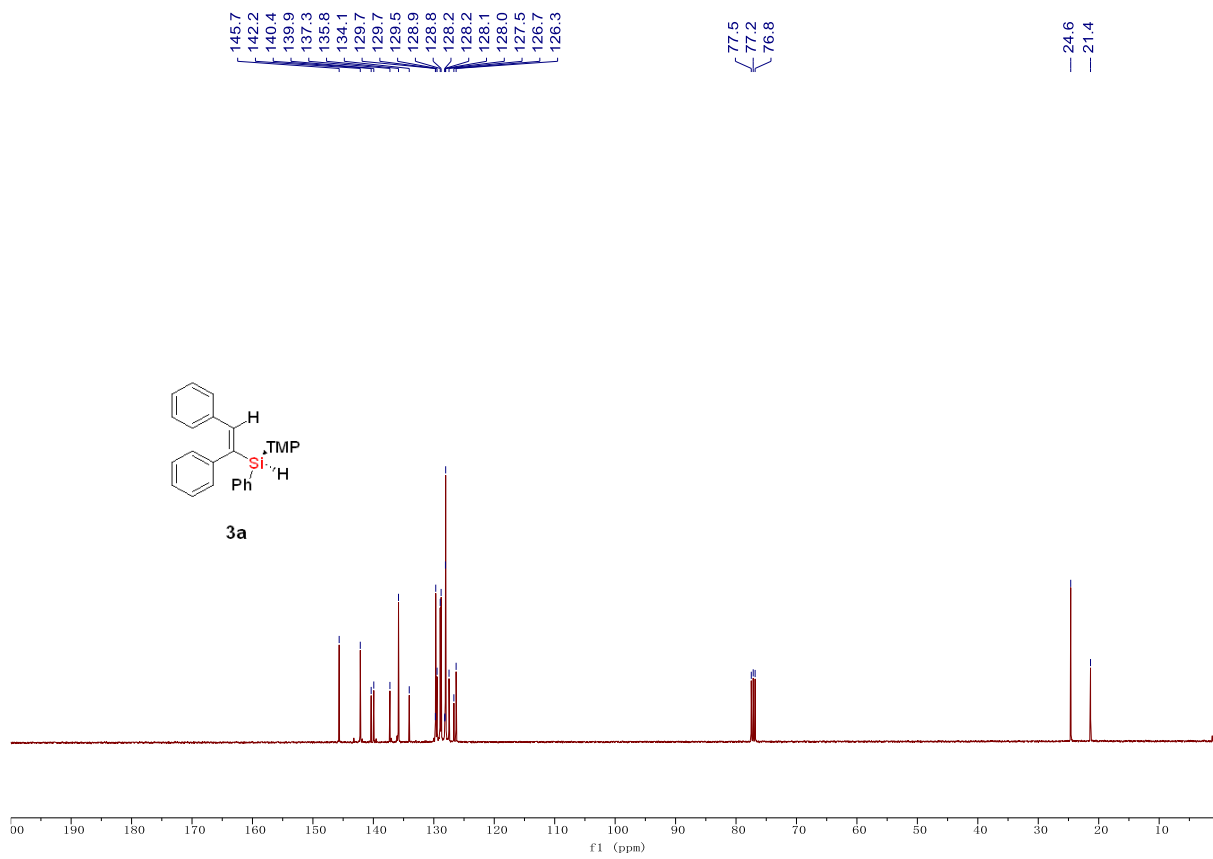

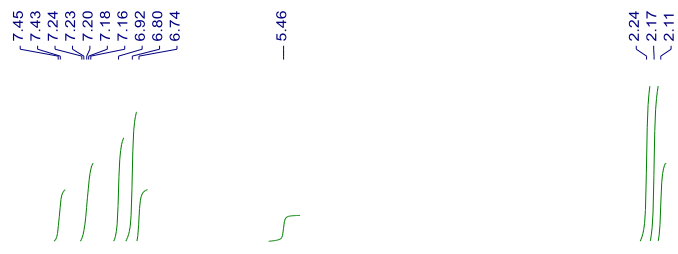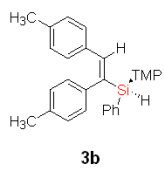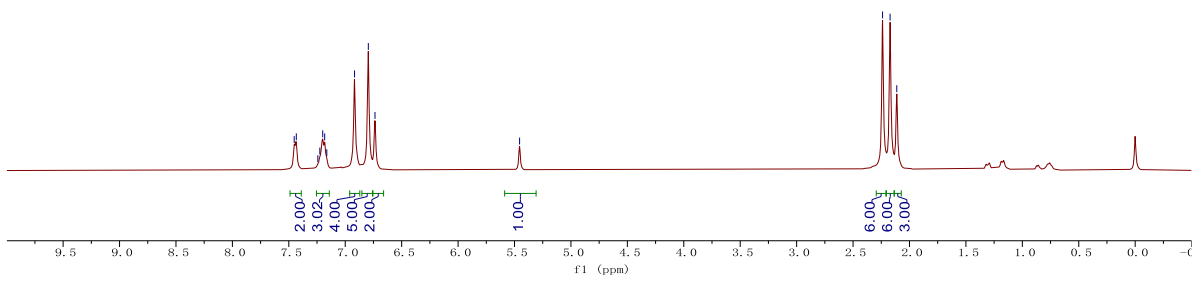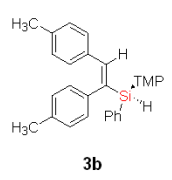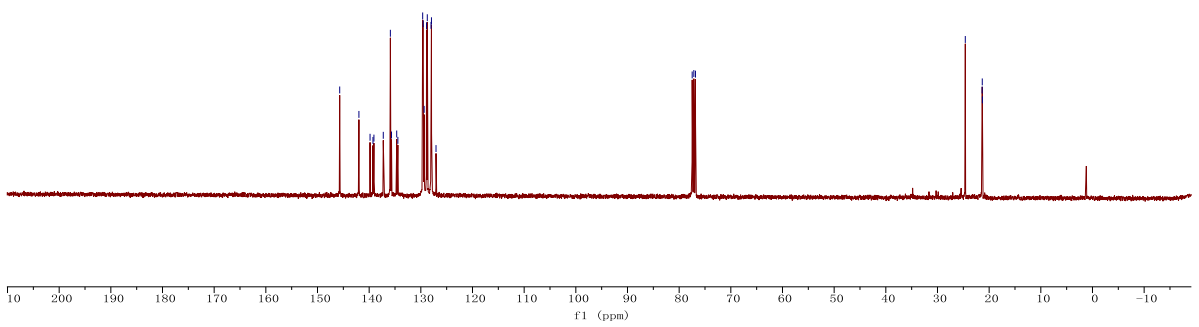



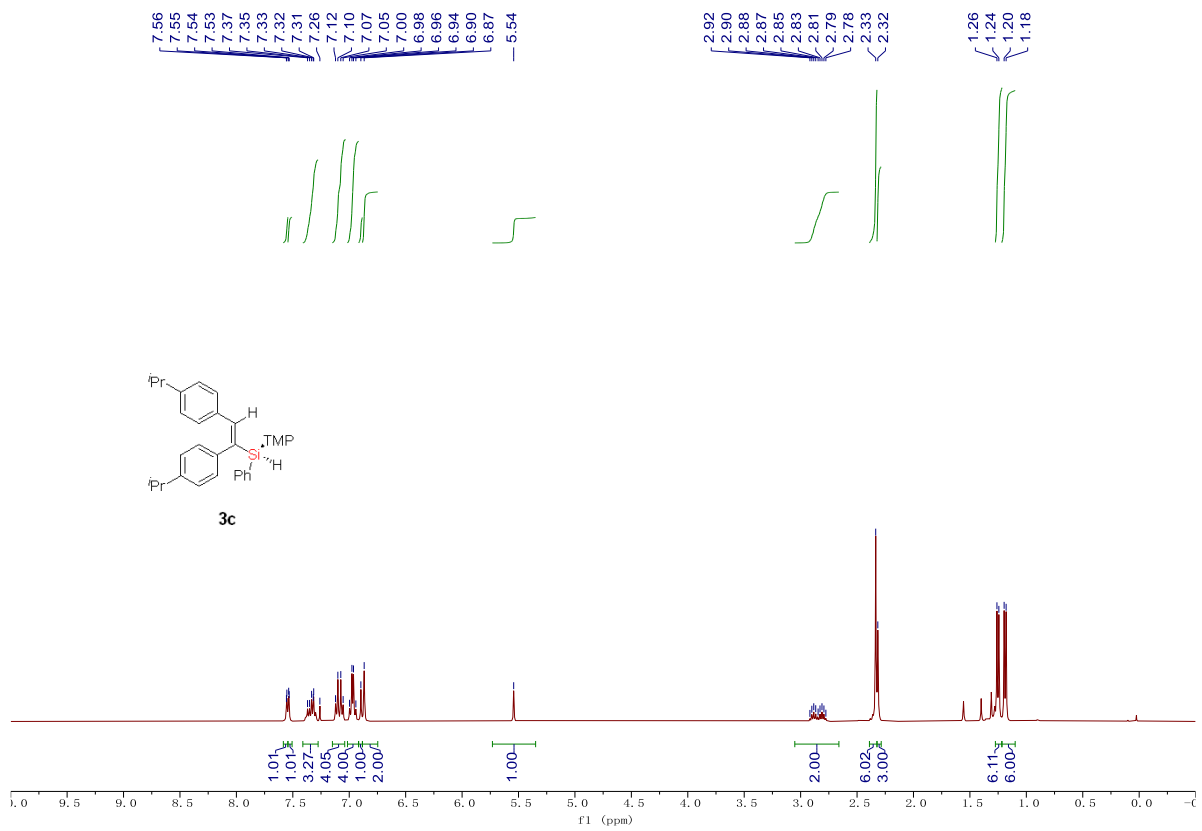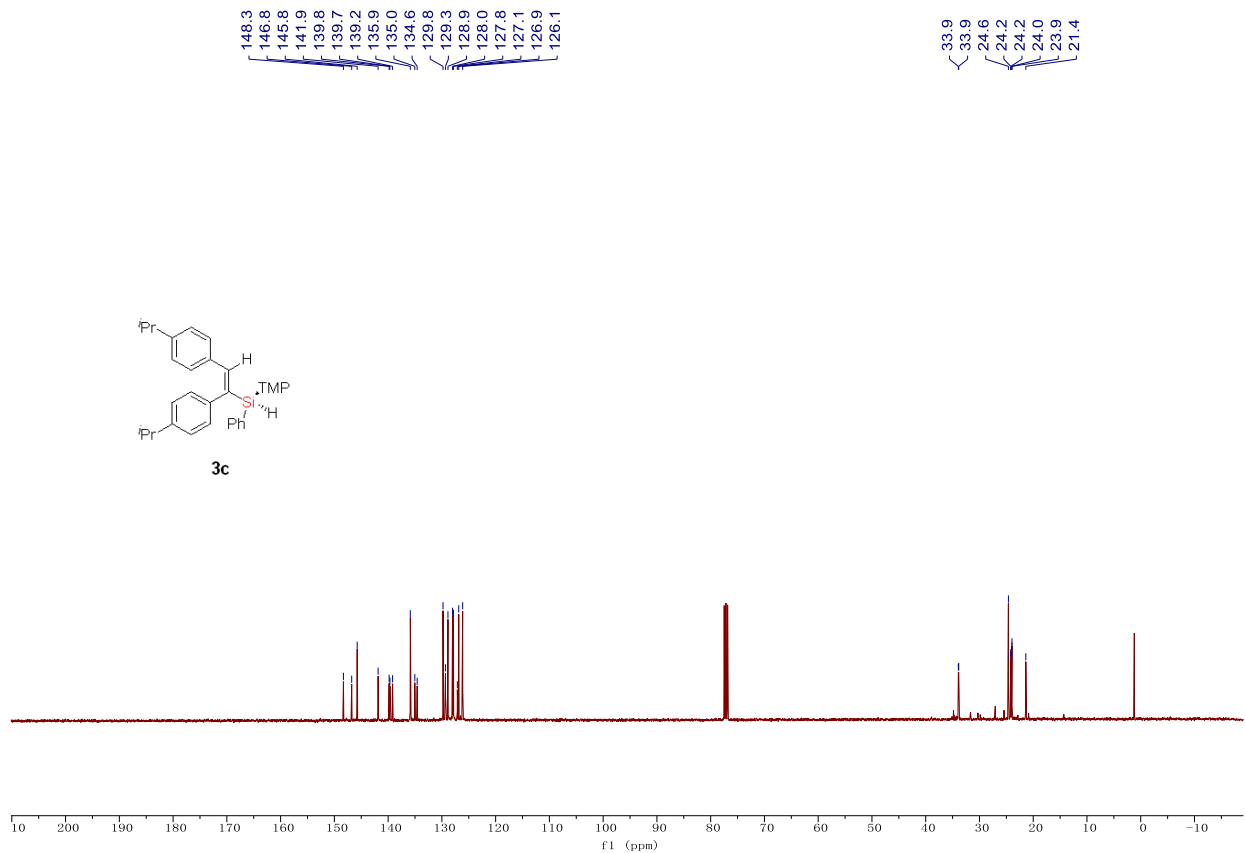

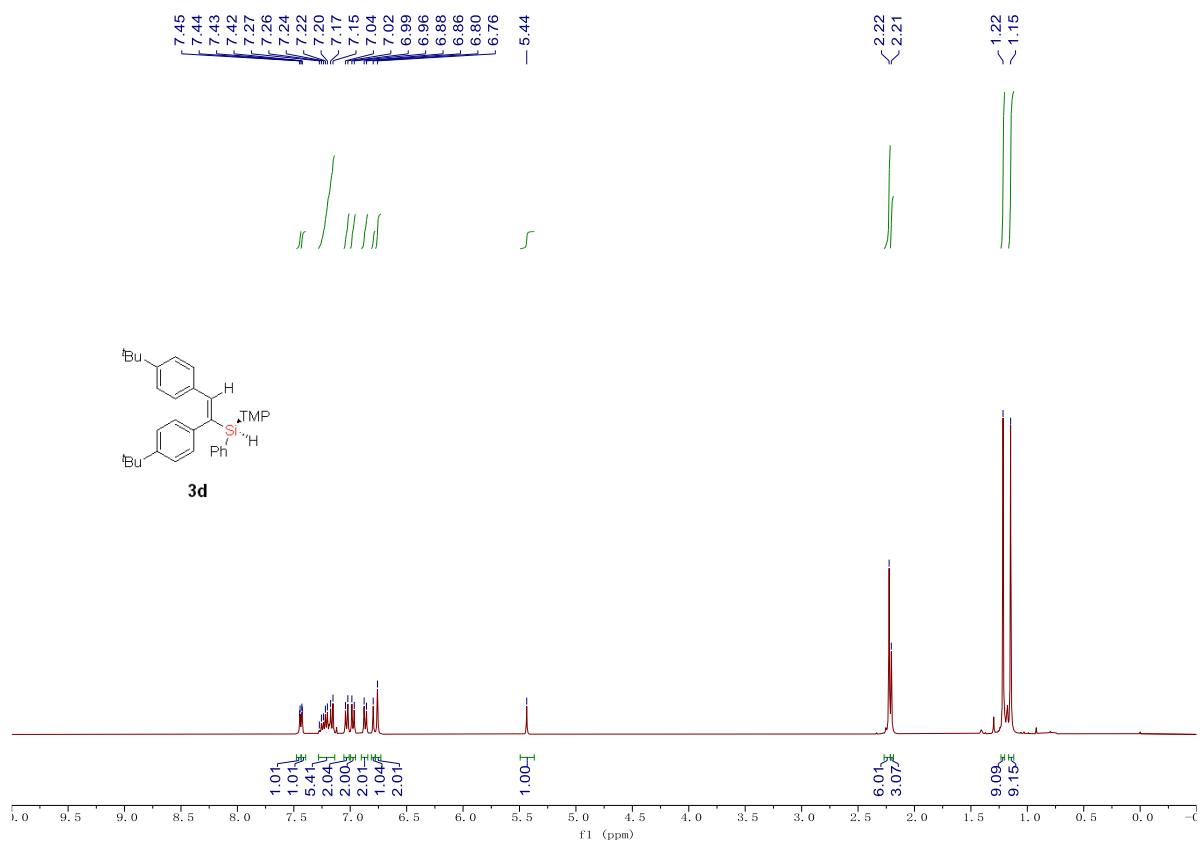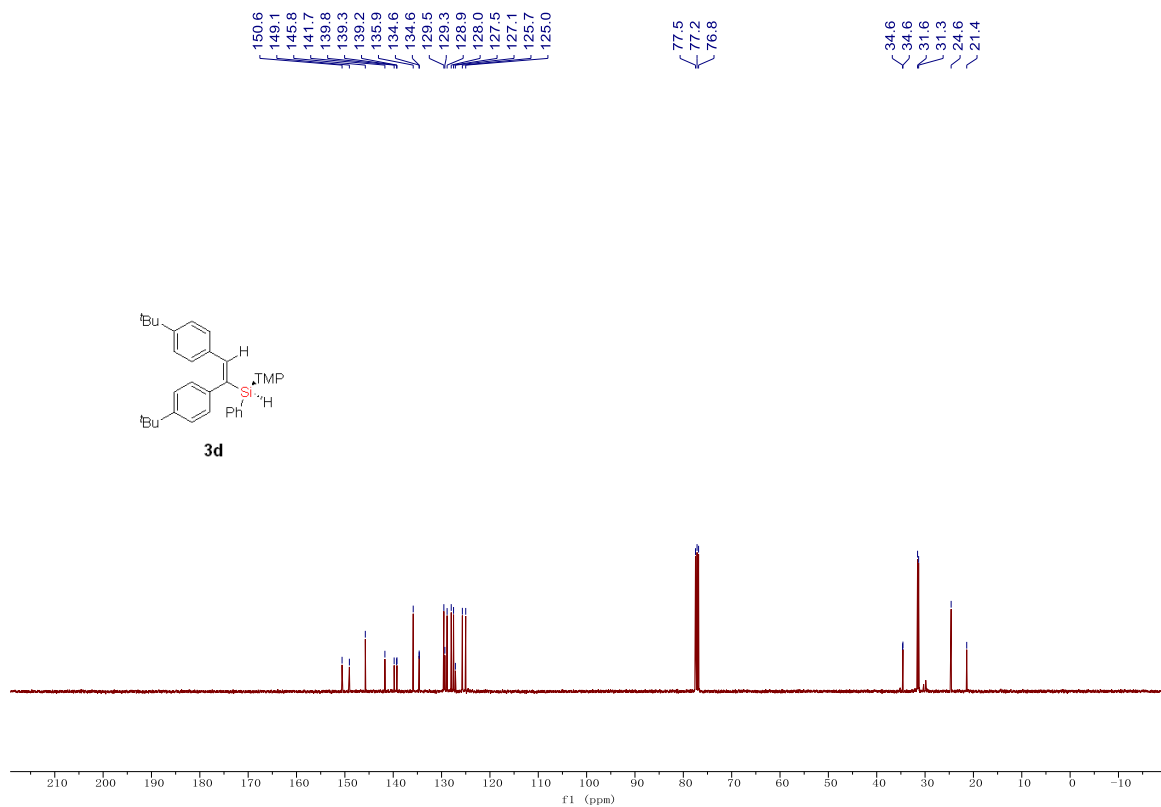

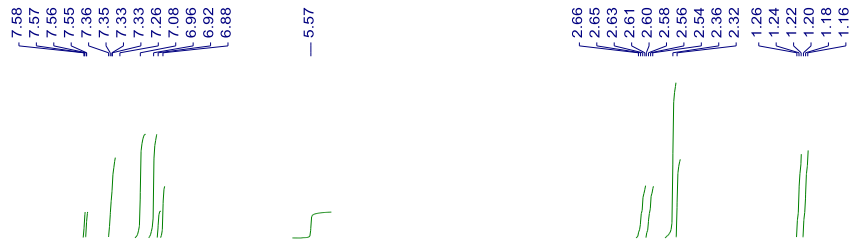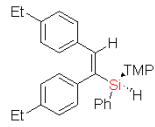

3e

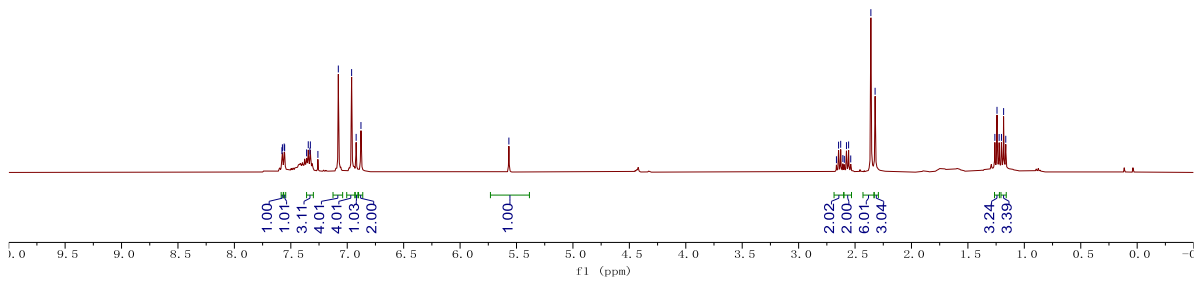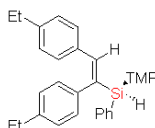

3e

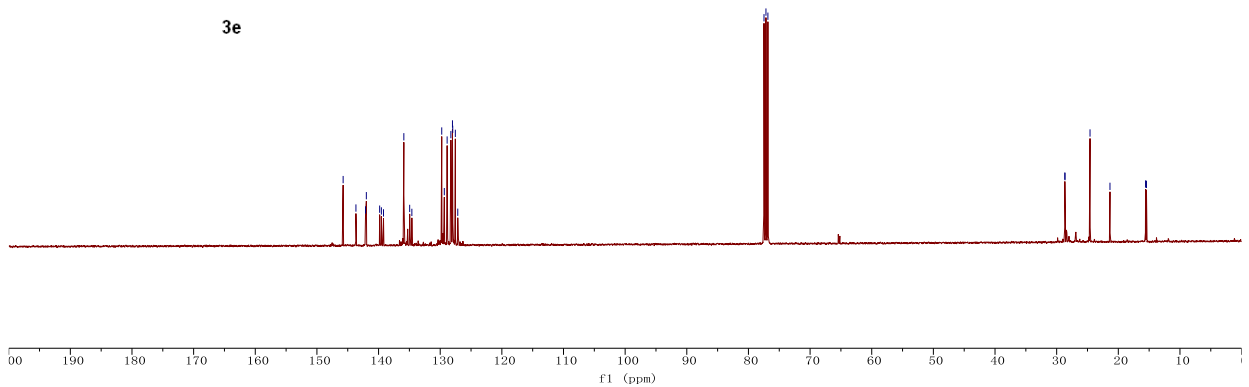

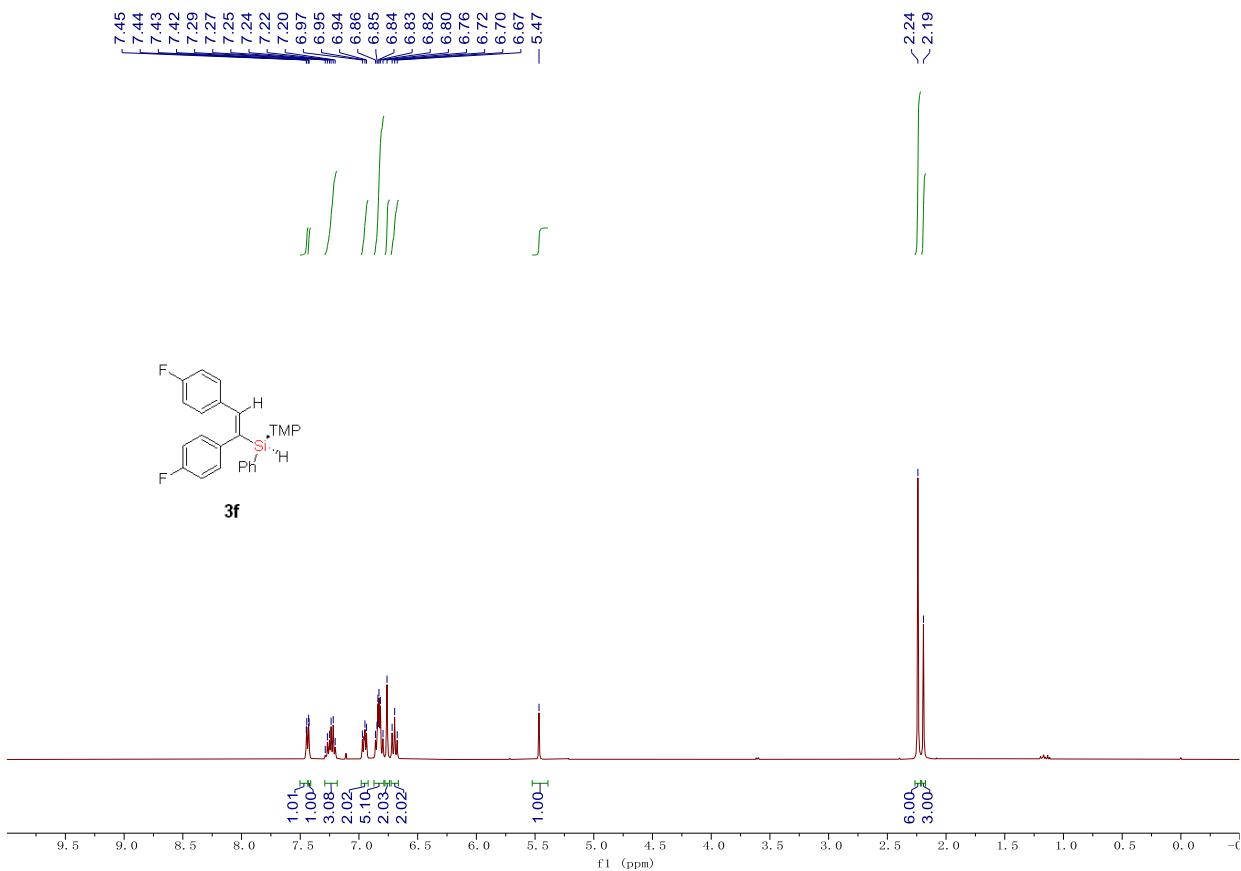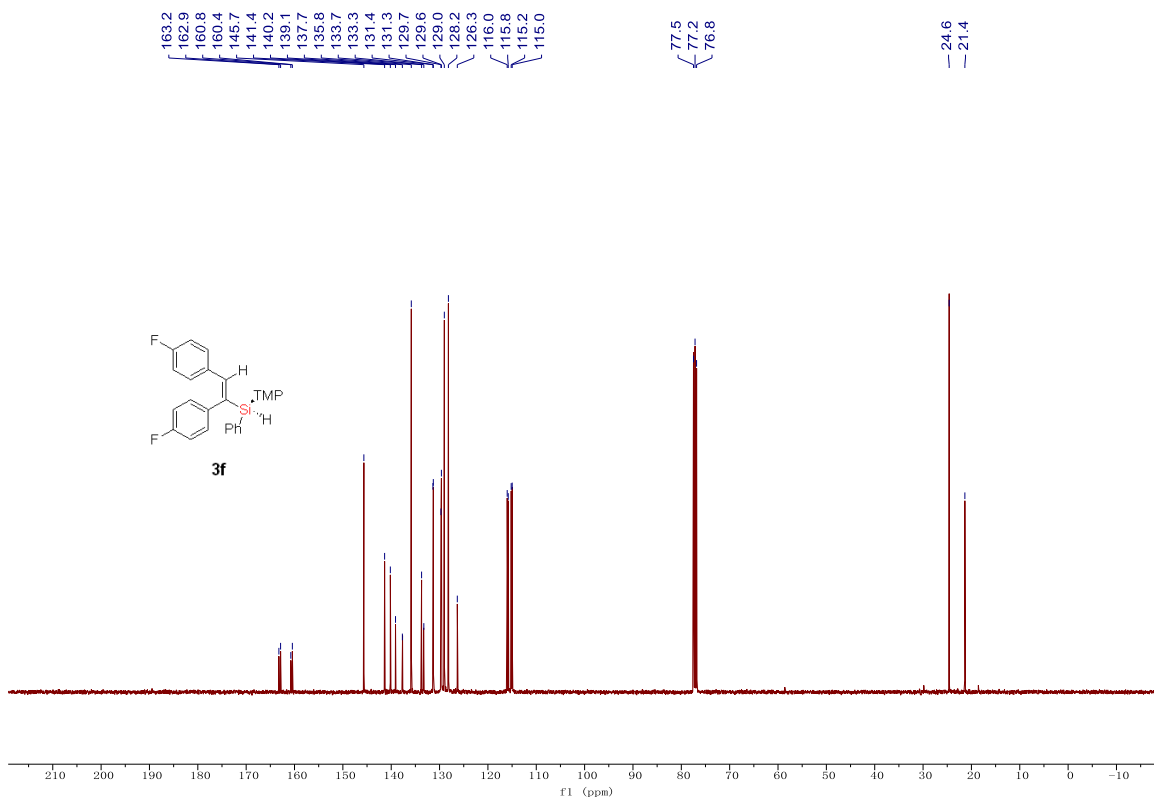

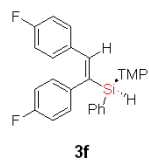

-113.42  
-116.09

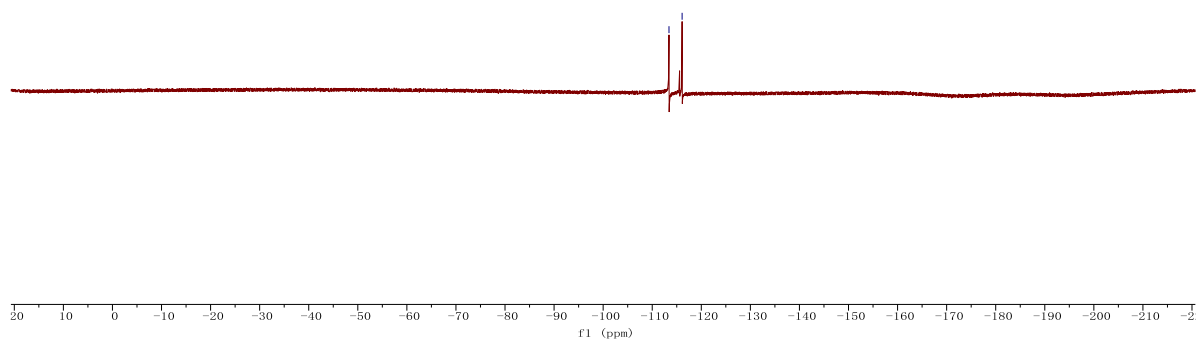

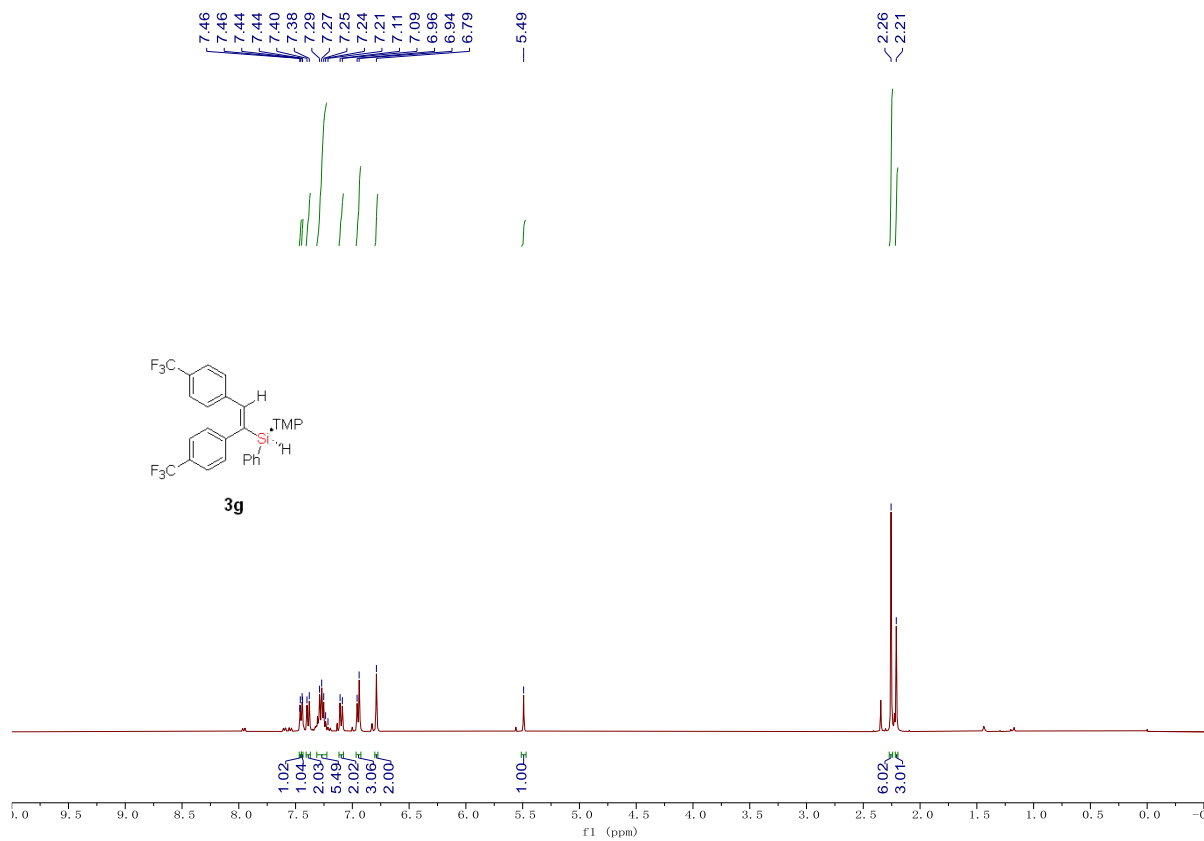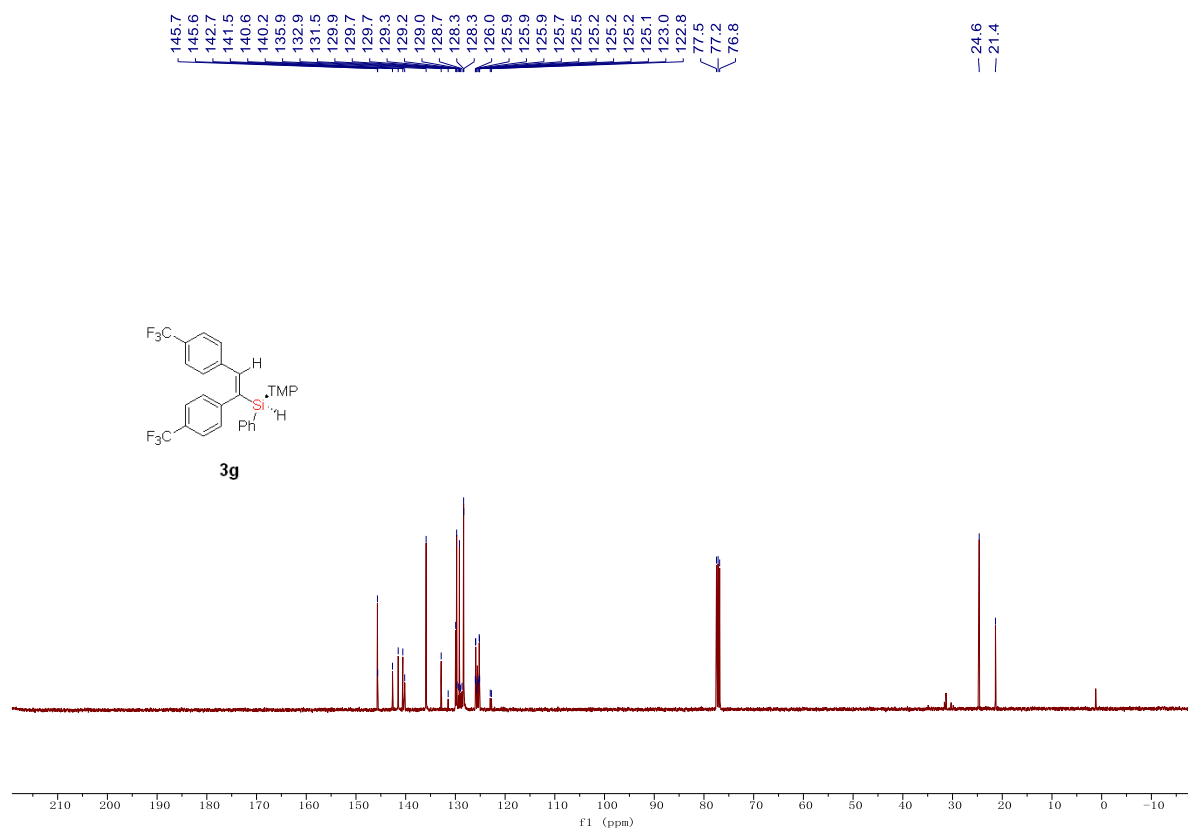

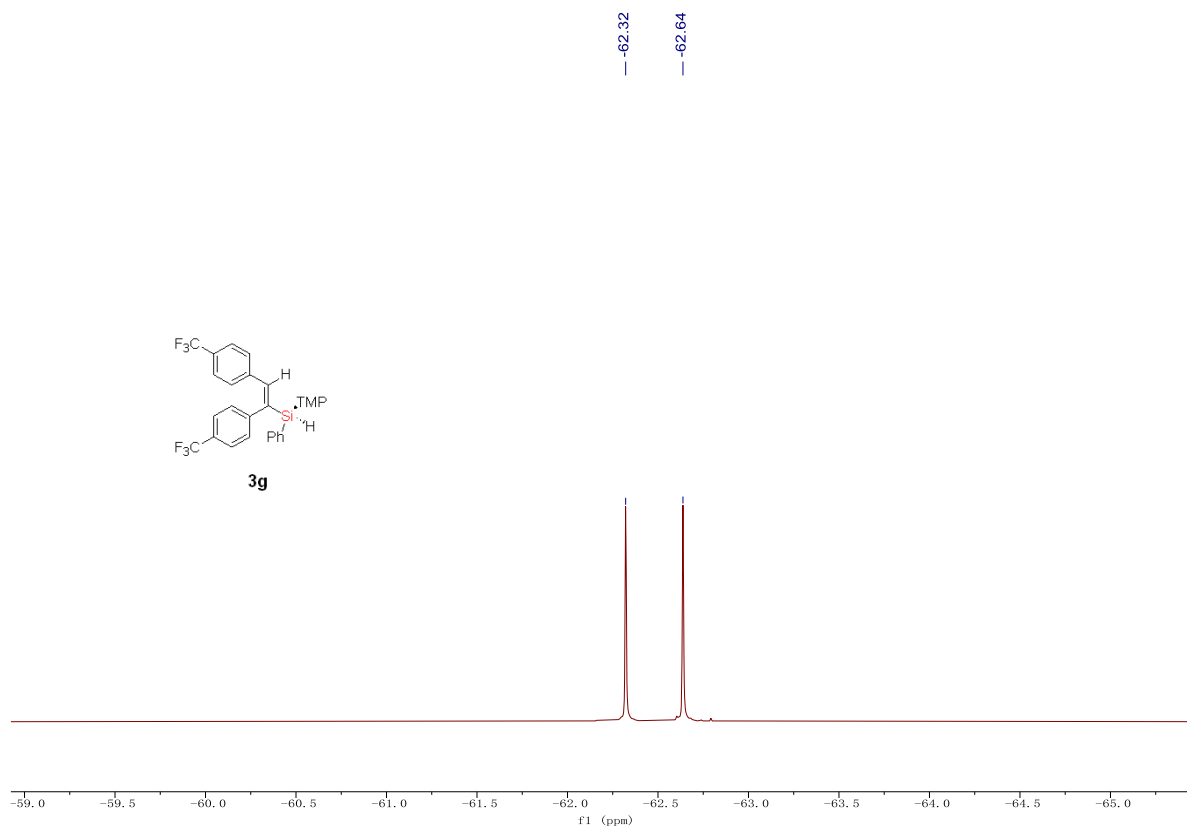

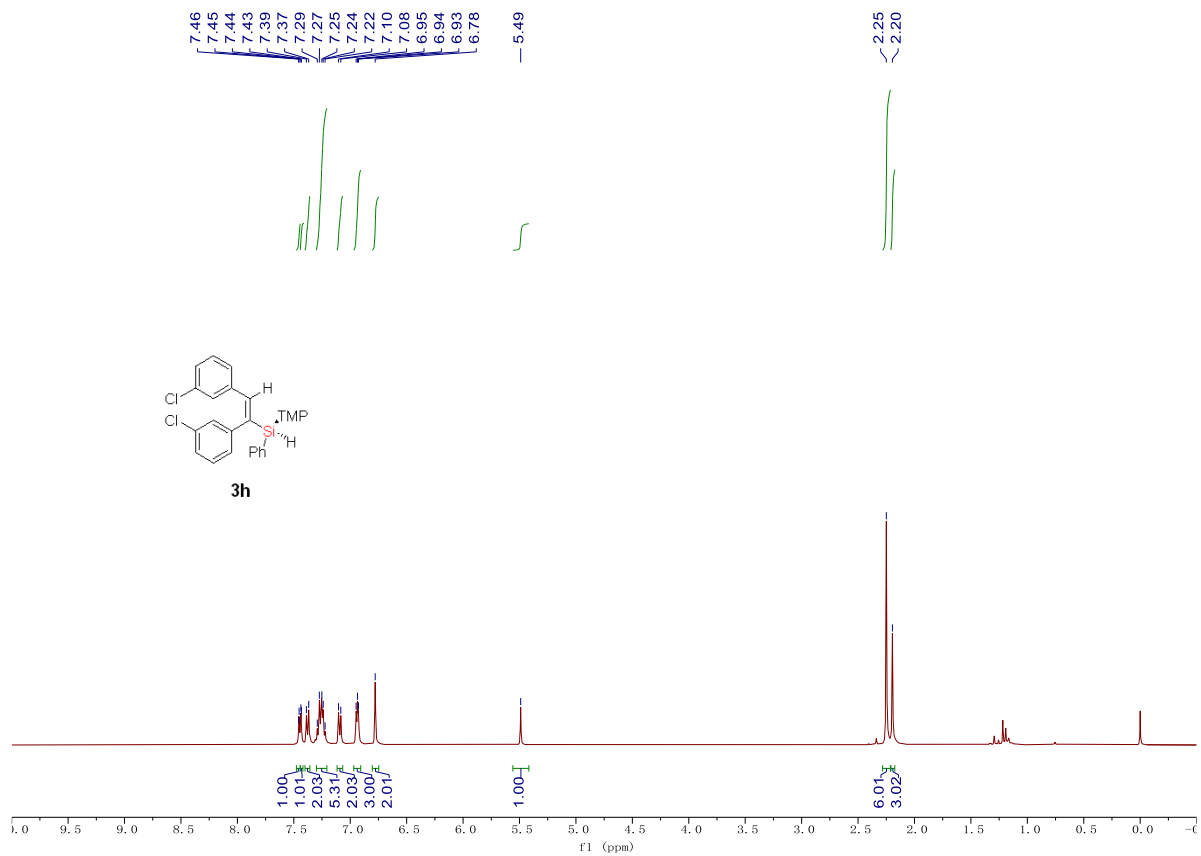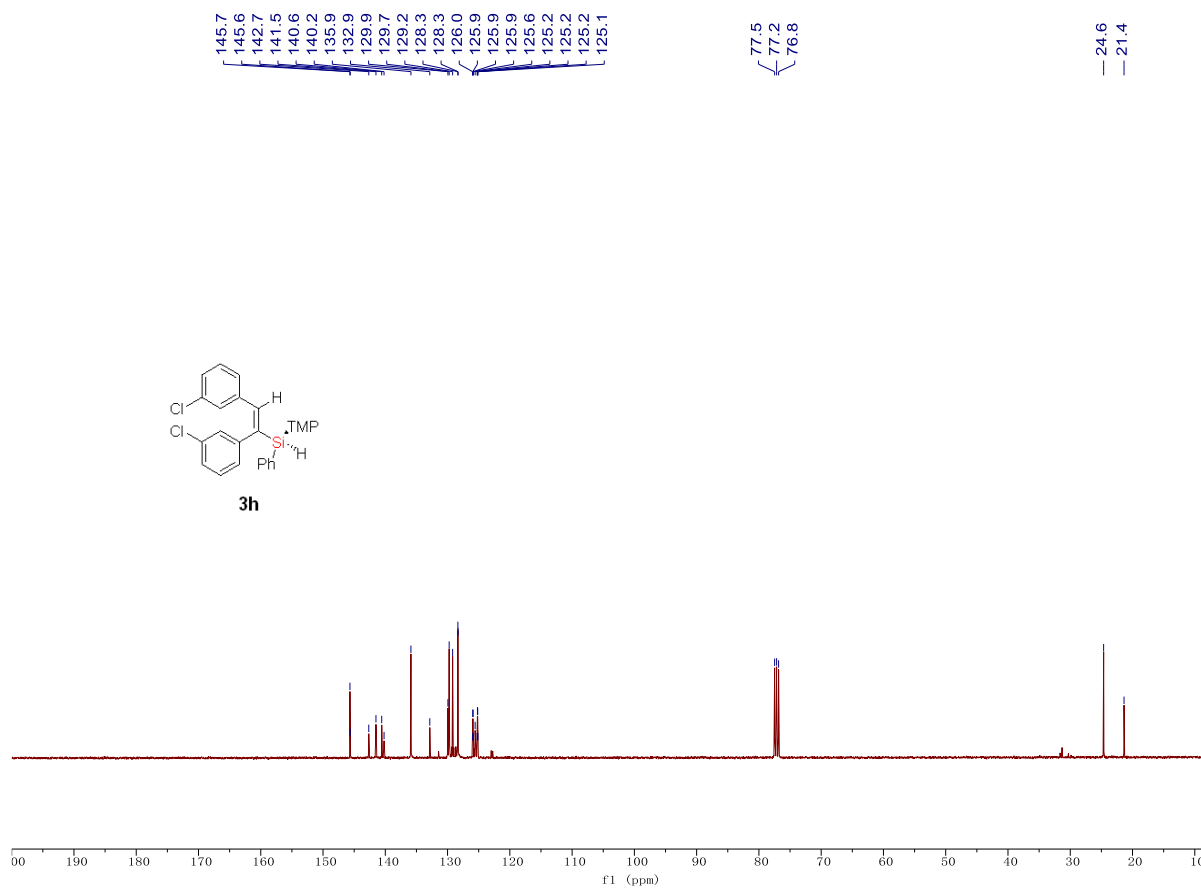



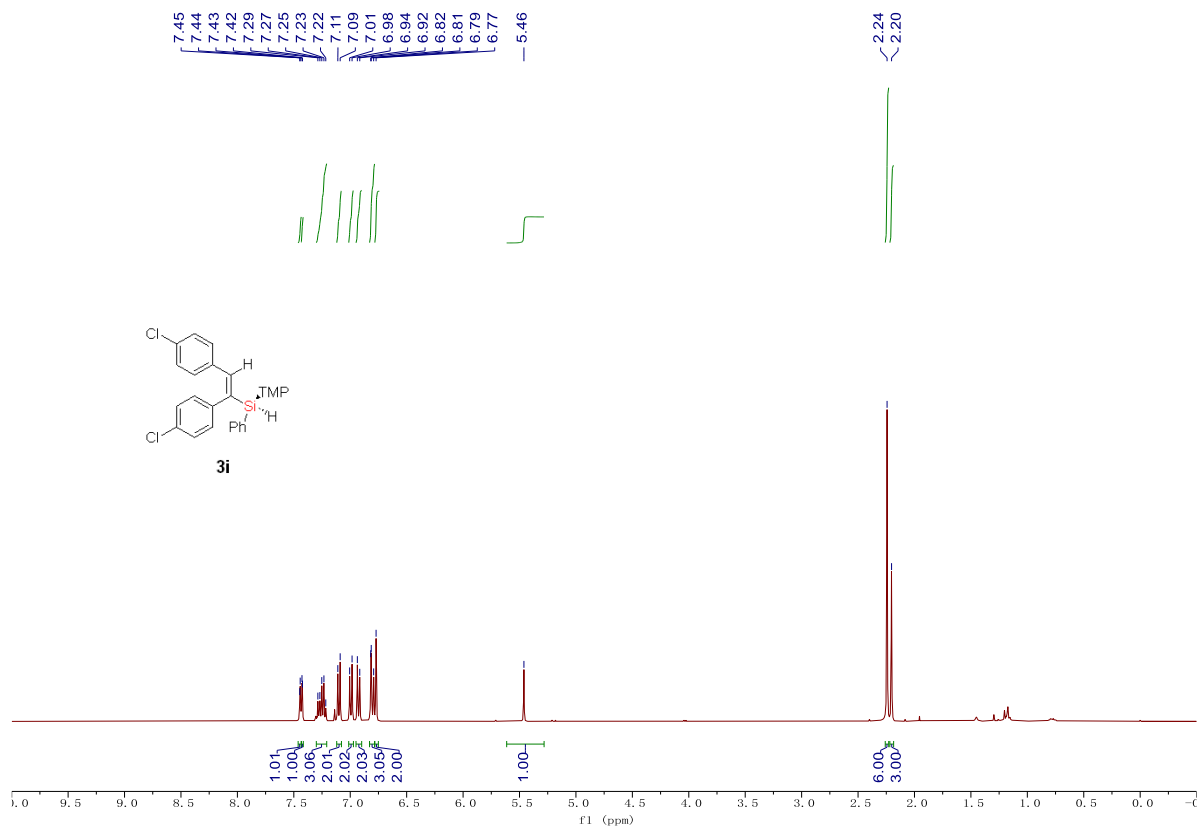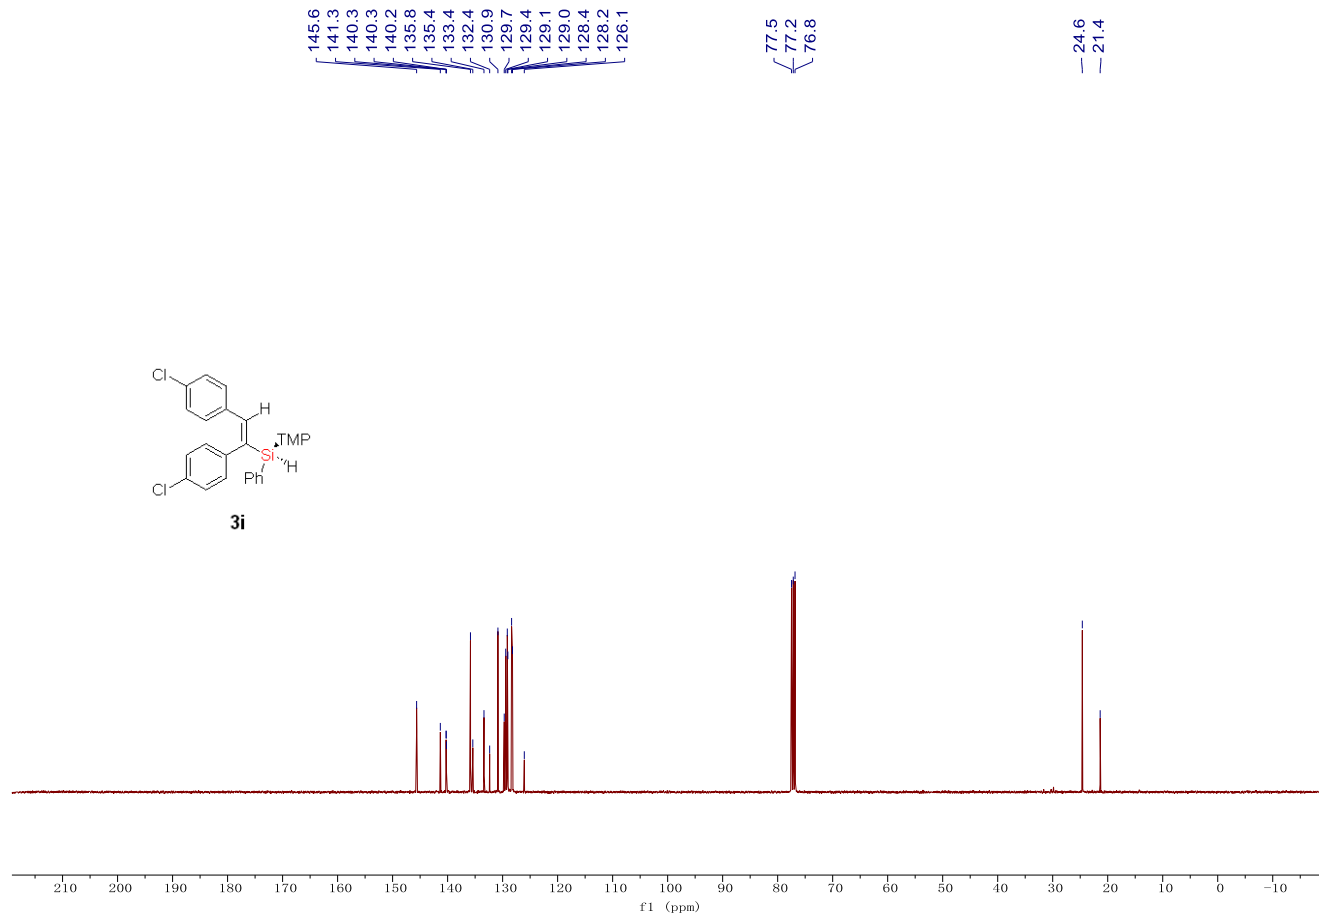

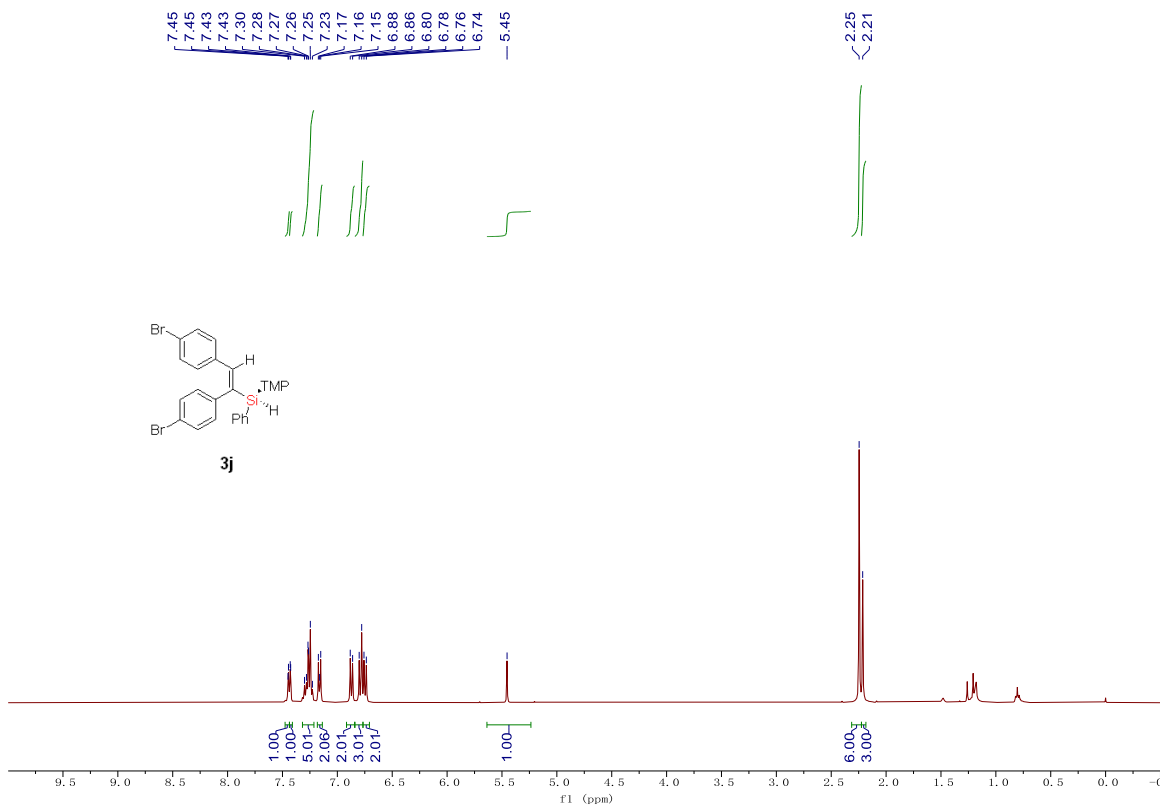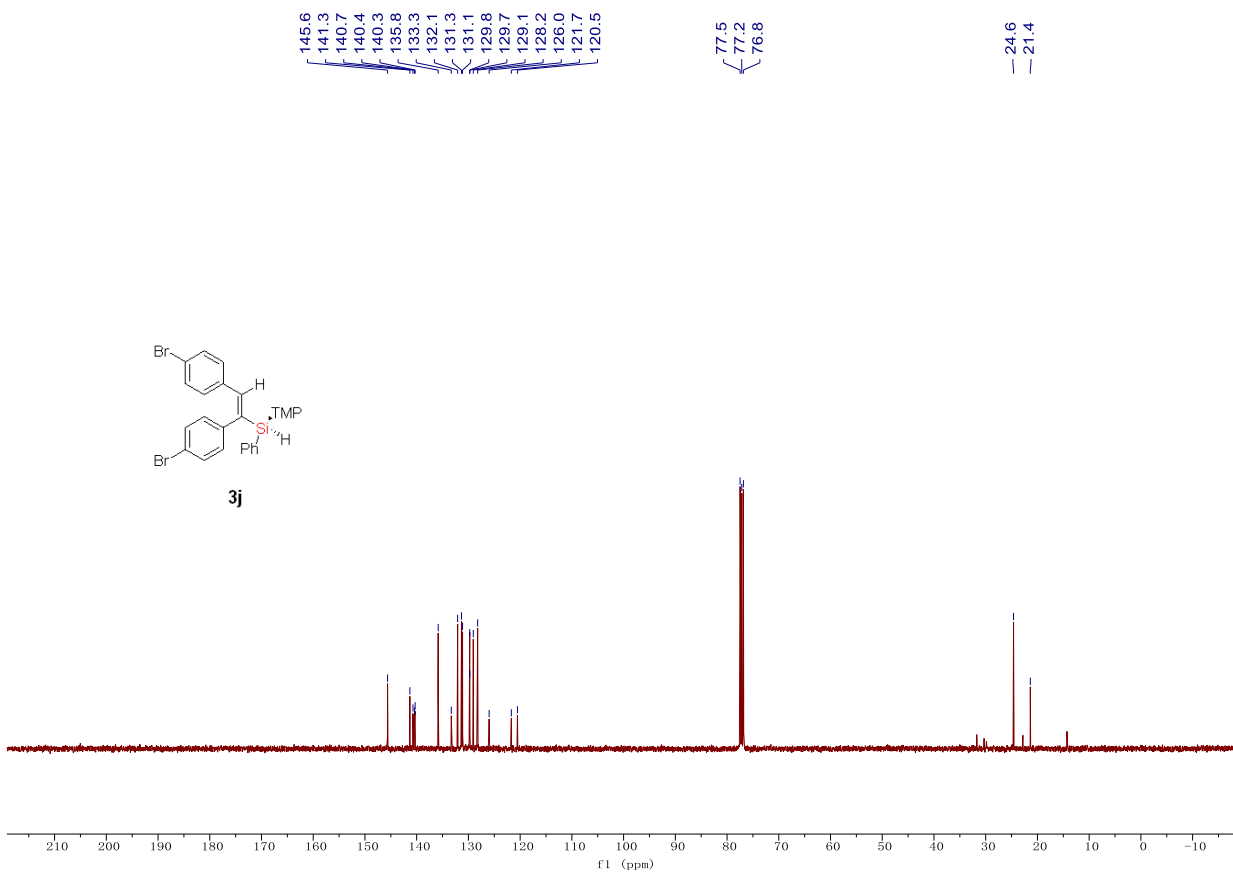

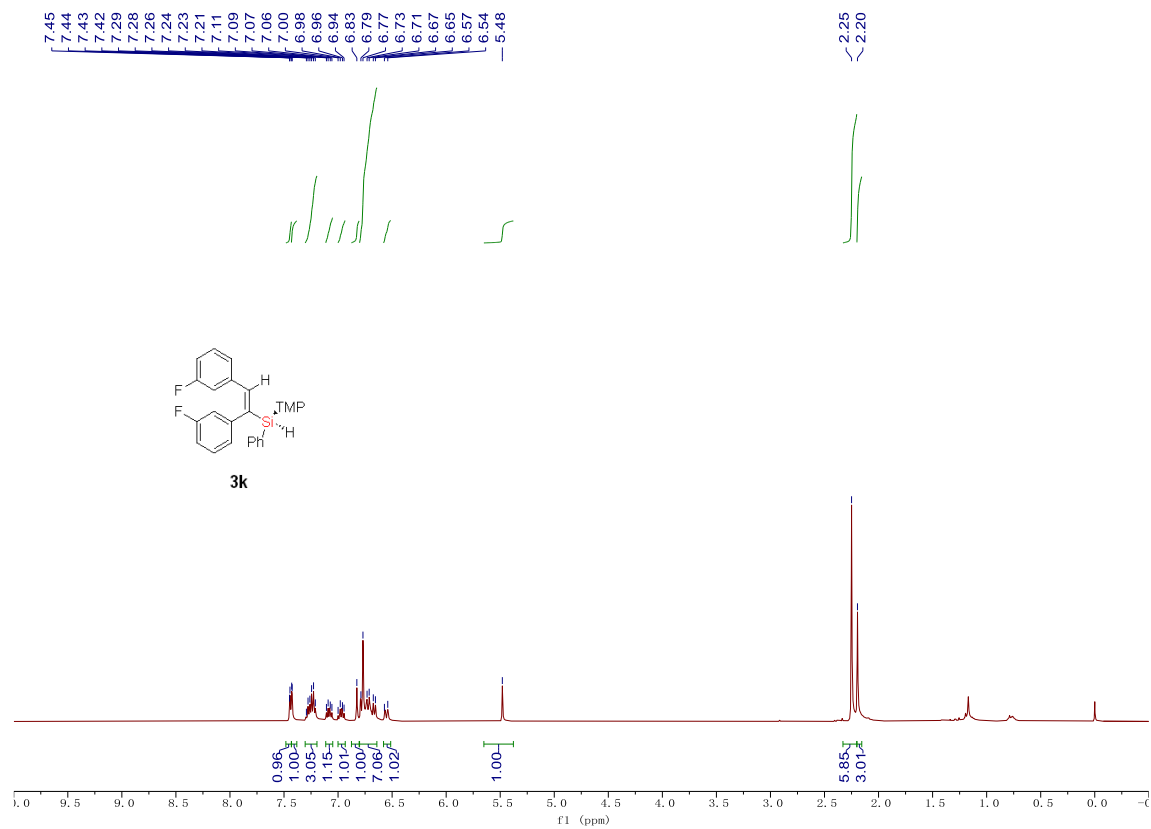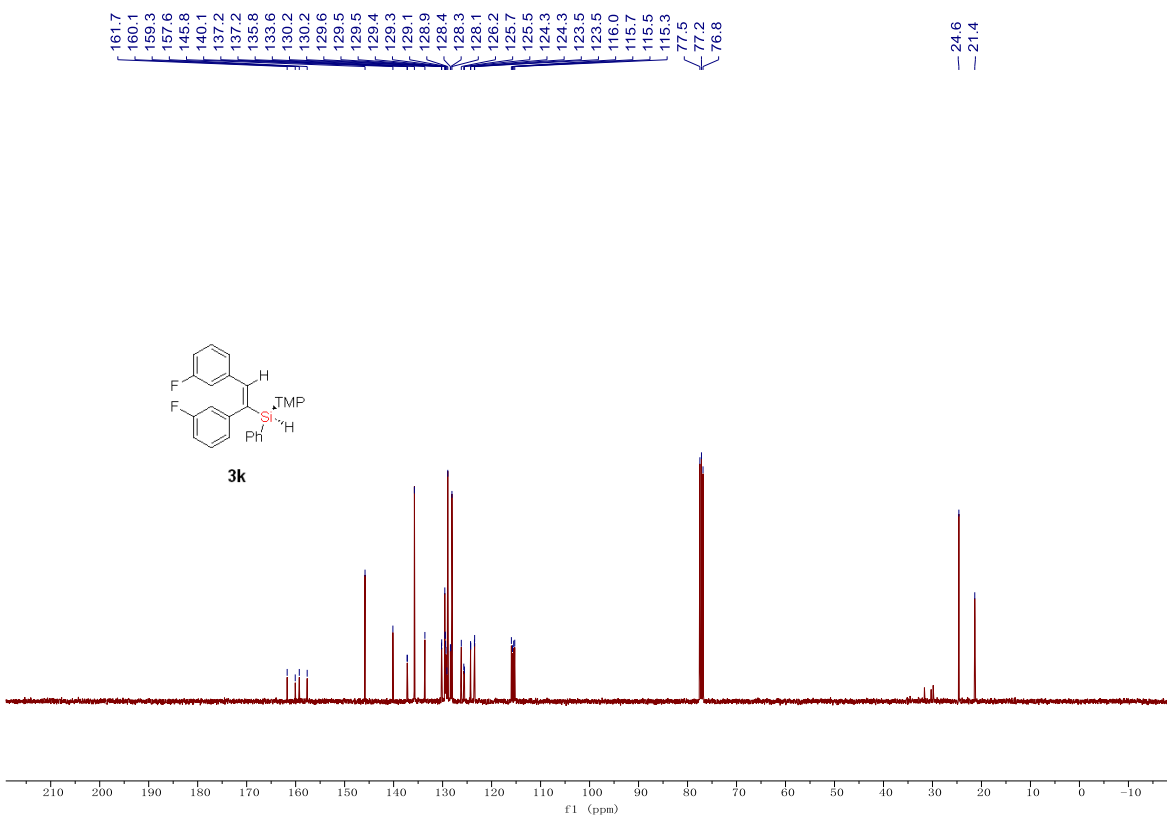

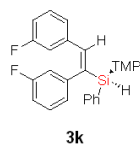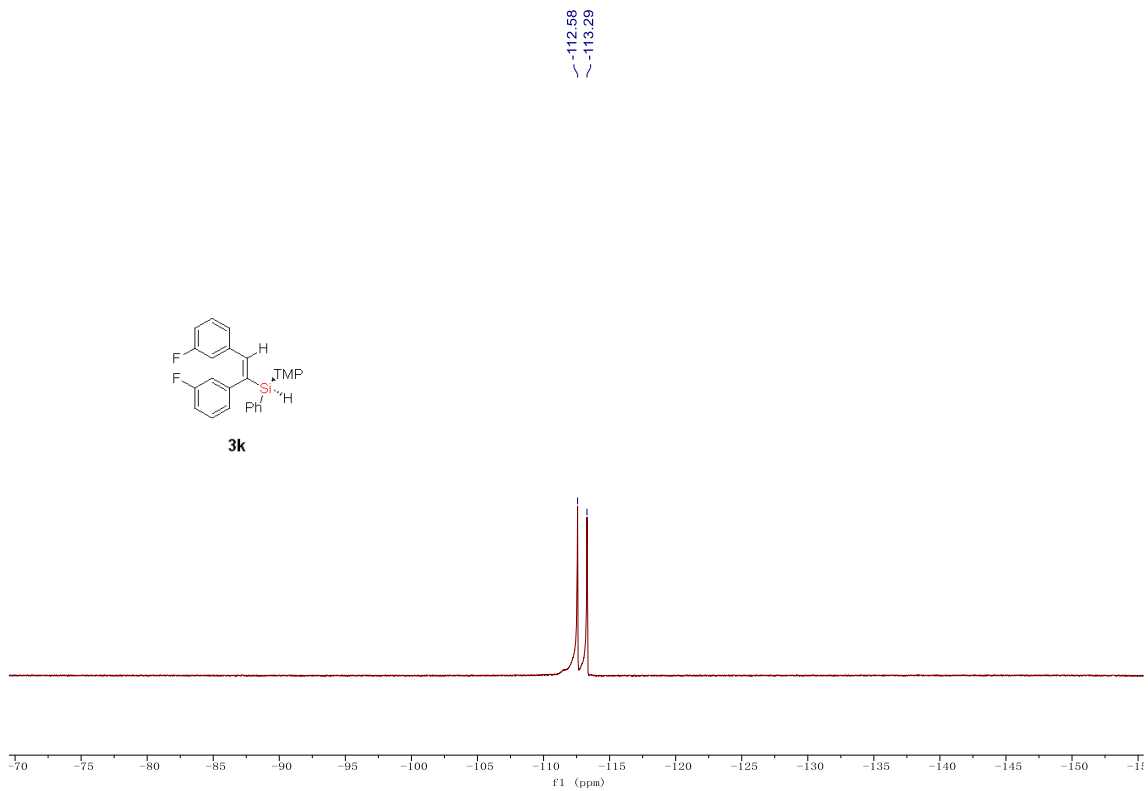

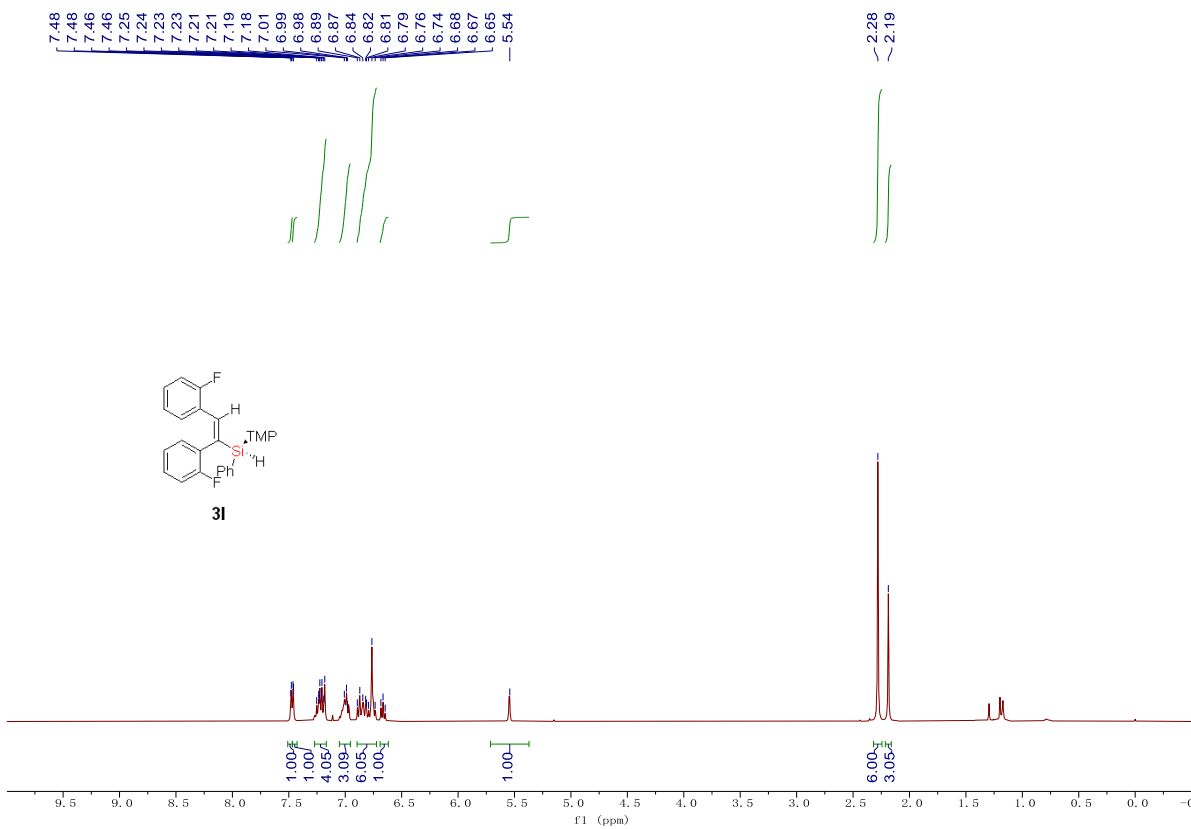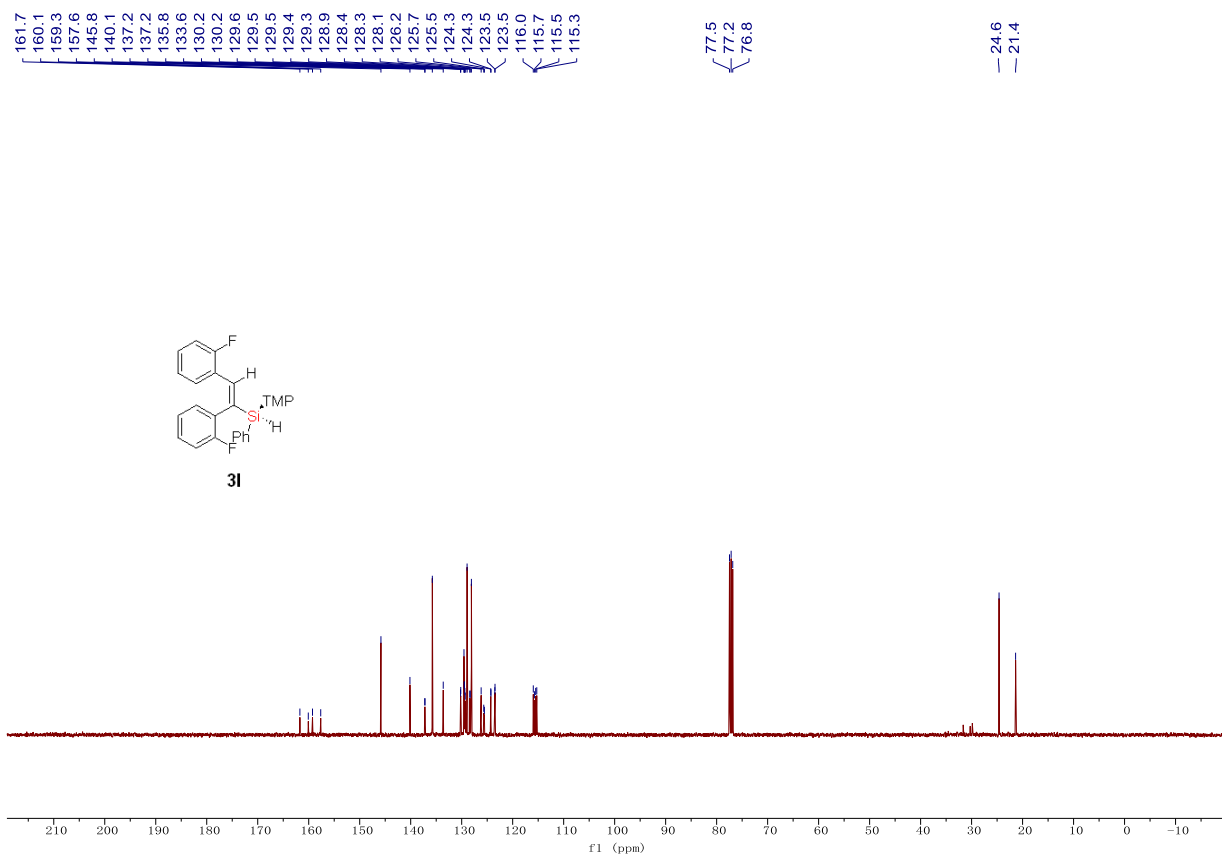

--113.31  
--115.95

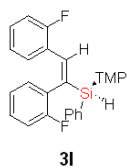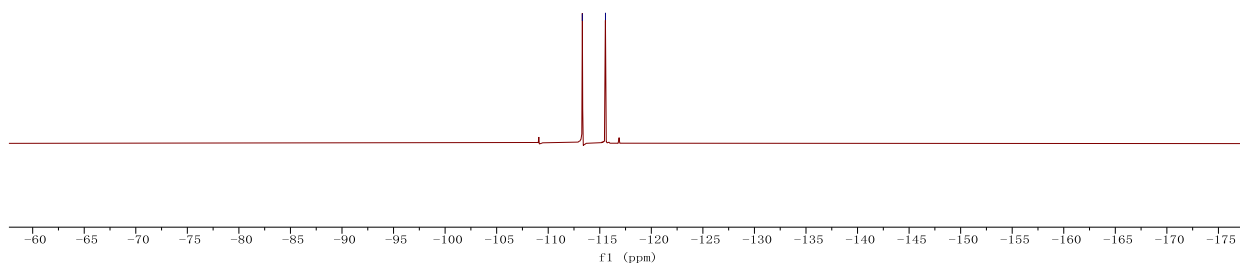

7.47  
7.45  
7.27  
7.24  
7.23  
7.15  
7.13  
7.12  
7.10  
7.08  
7.06  
7.04  
7.02  
6.99  
6.93  
6.91  
6.88  
— 5.52

— 2.29

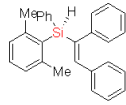

**3m**

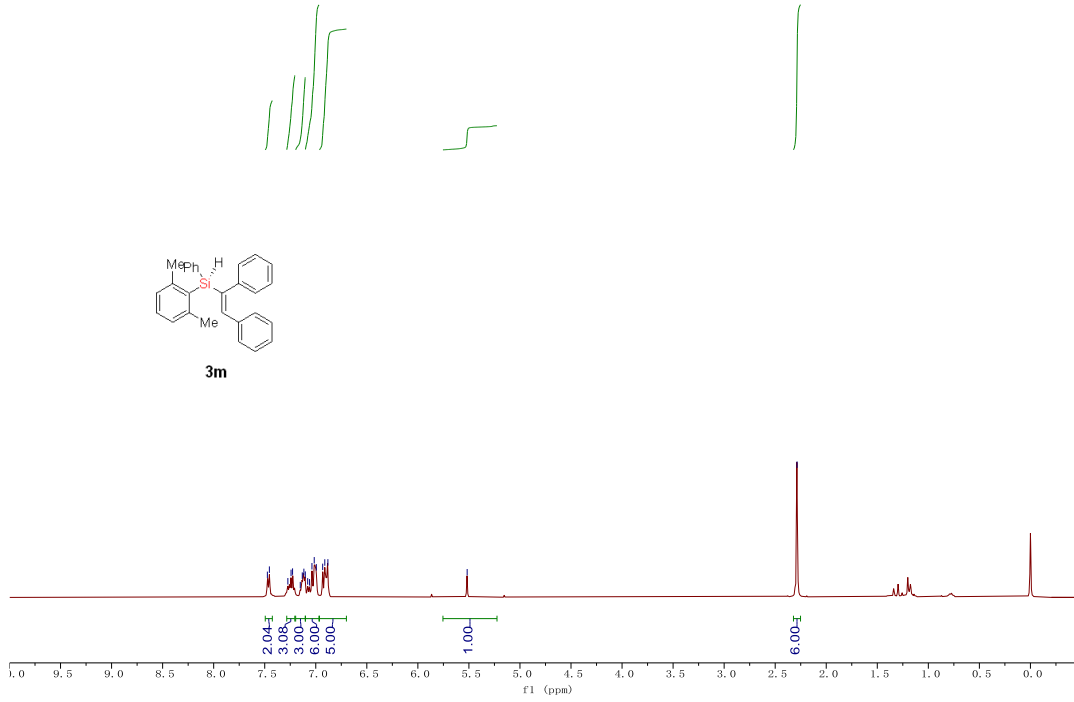

145.7  
142.3  
142.1  
140.1  
137.3  
135.9  
133.9  
130.4  
130.2  
129.7  
129.5  
128.8  
128.1  
128.1  
127.9  
126.4

77.5  
77.2  
76.8

— 24.8

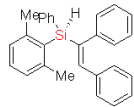

**3m**

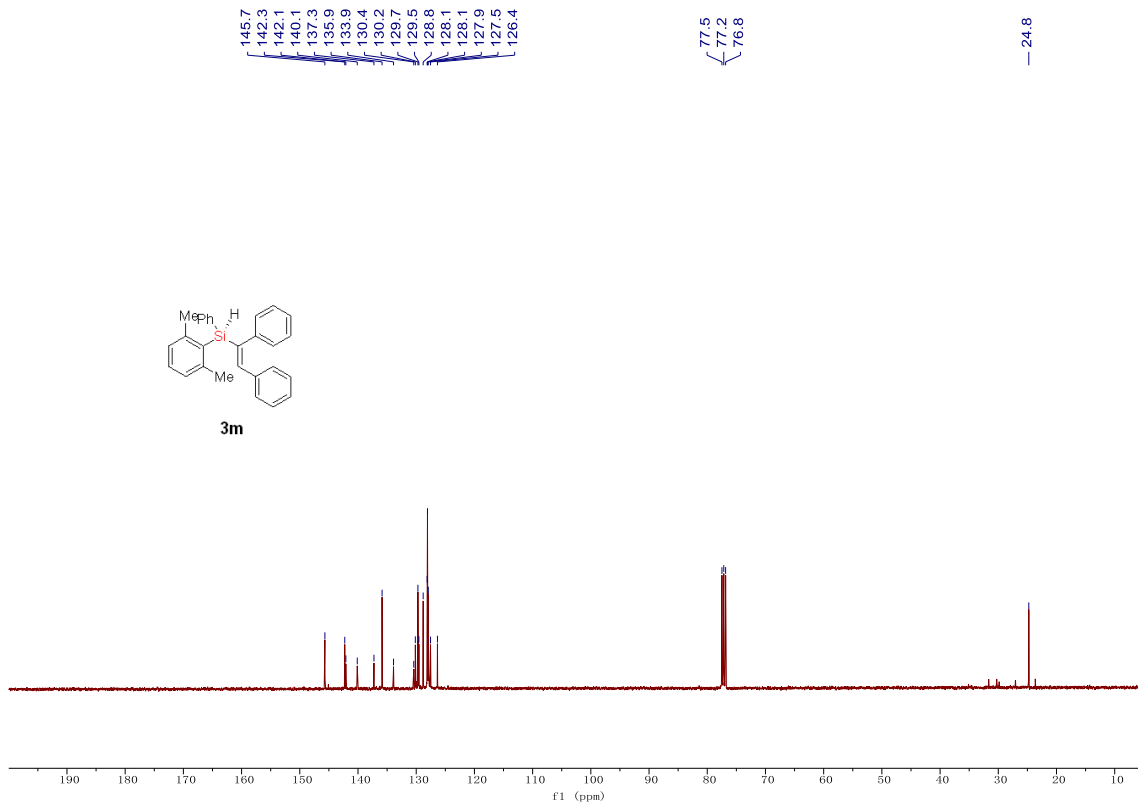

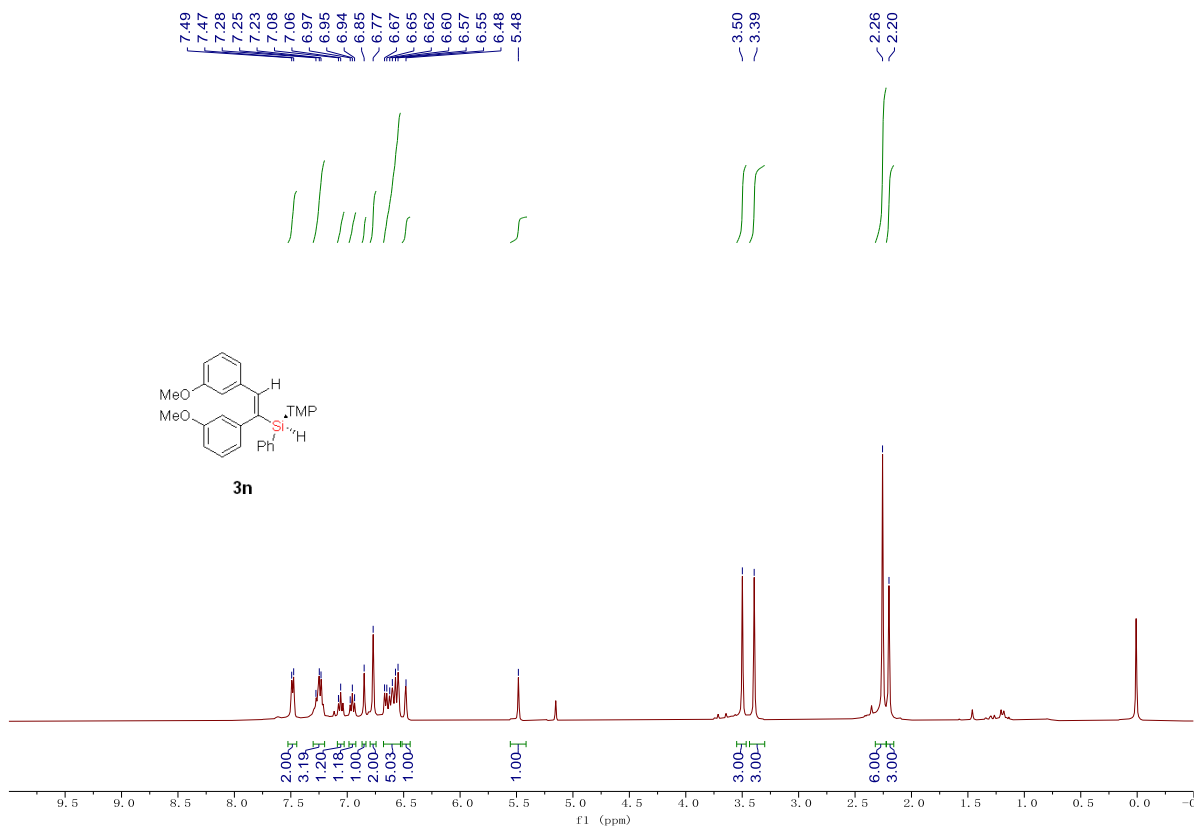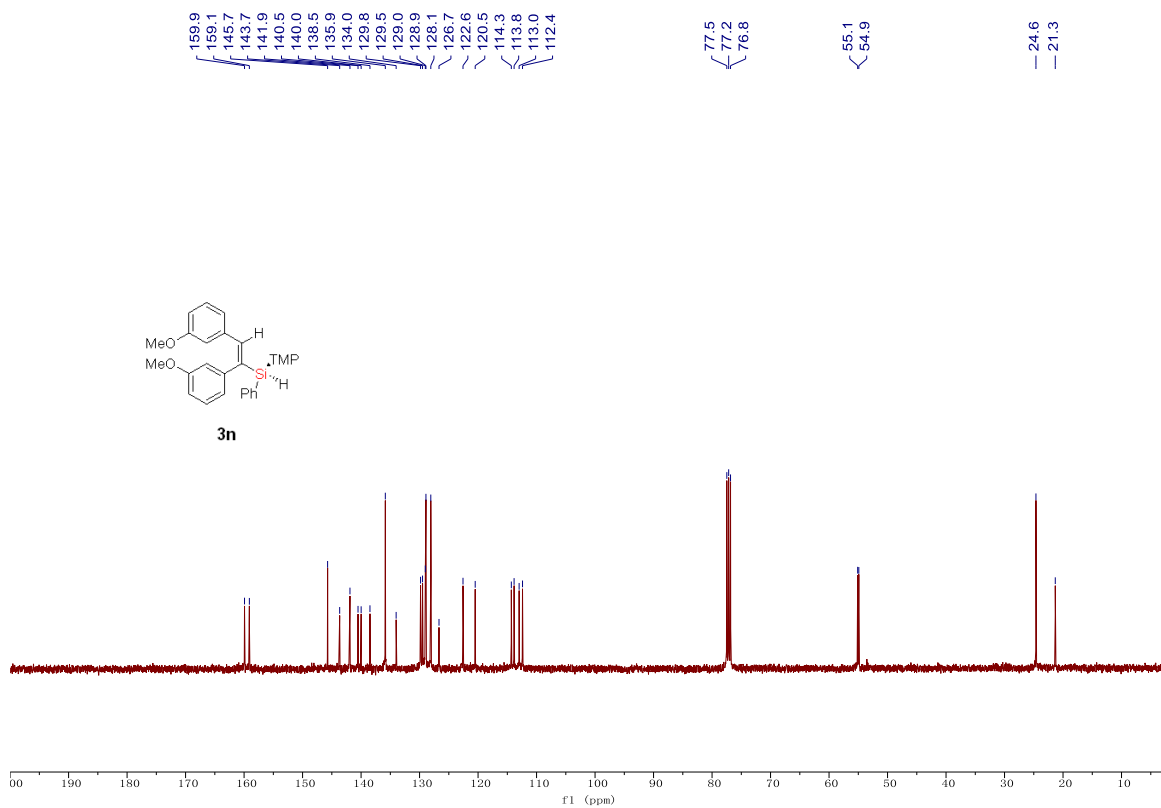



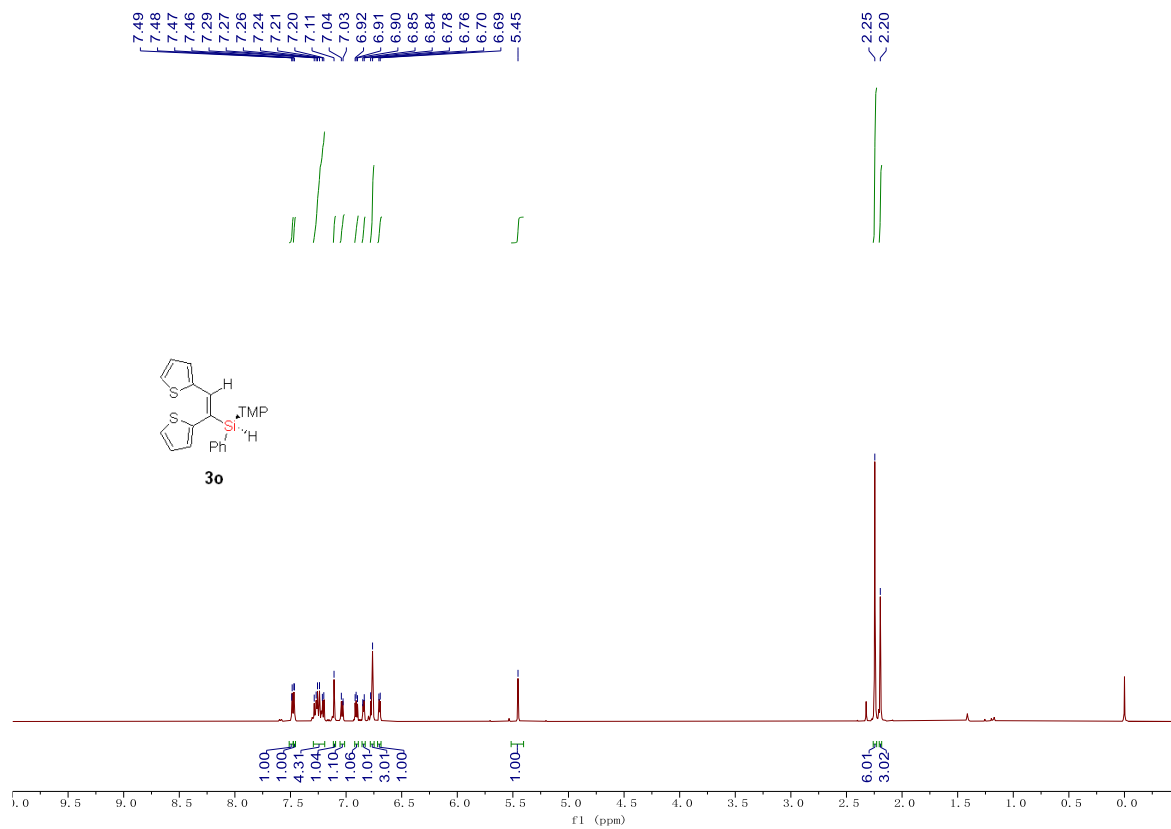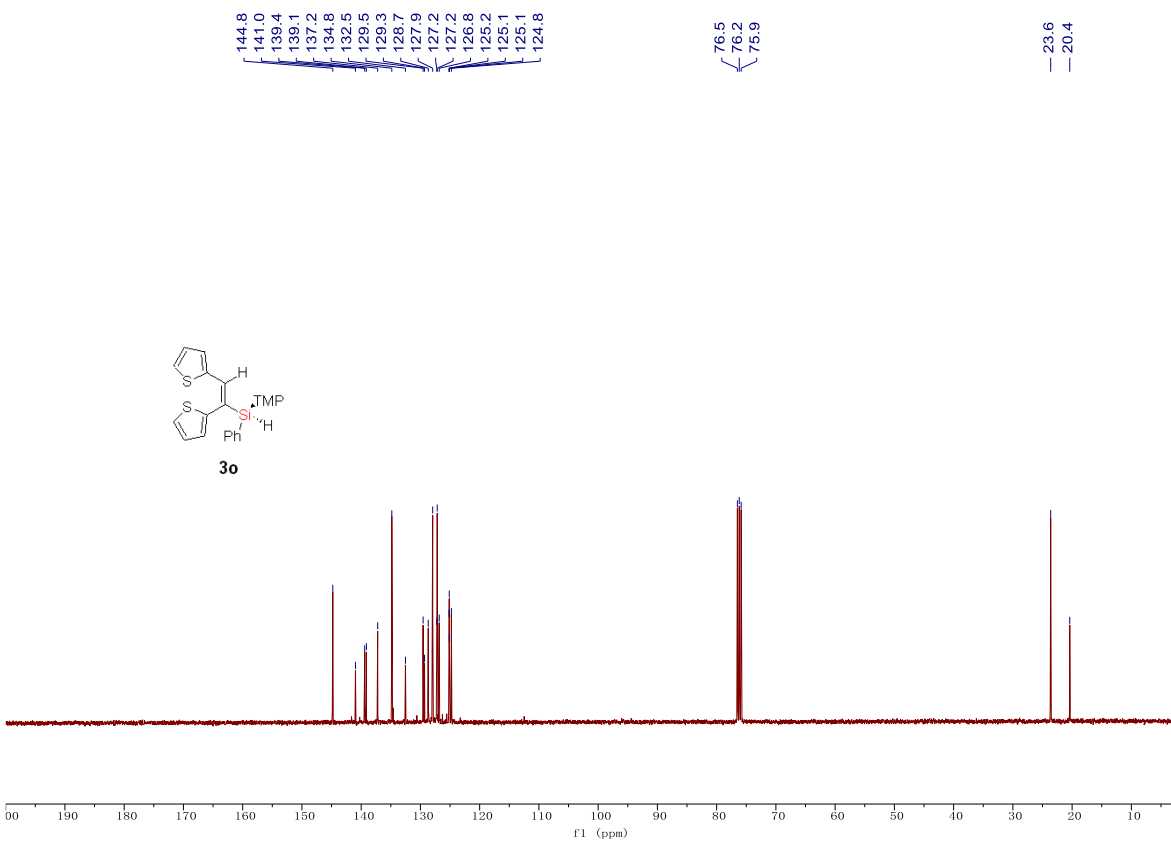

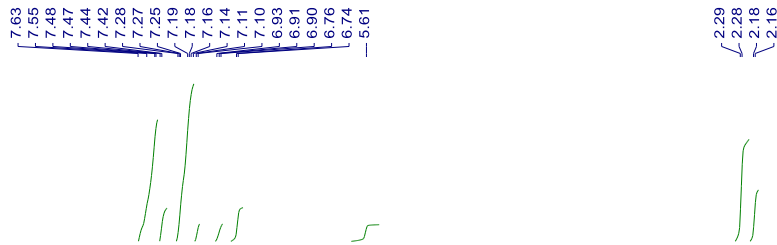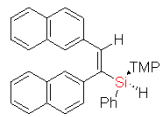

3p

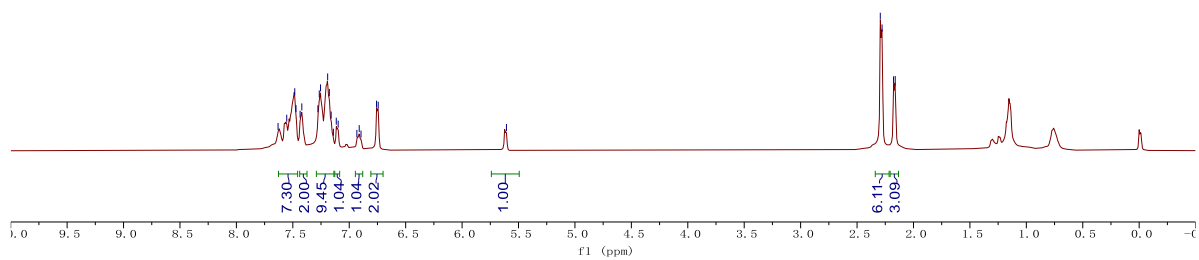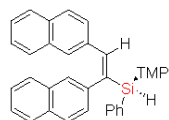

3p

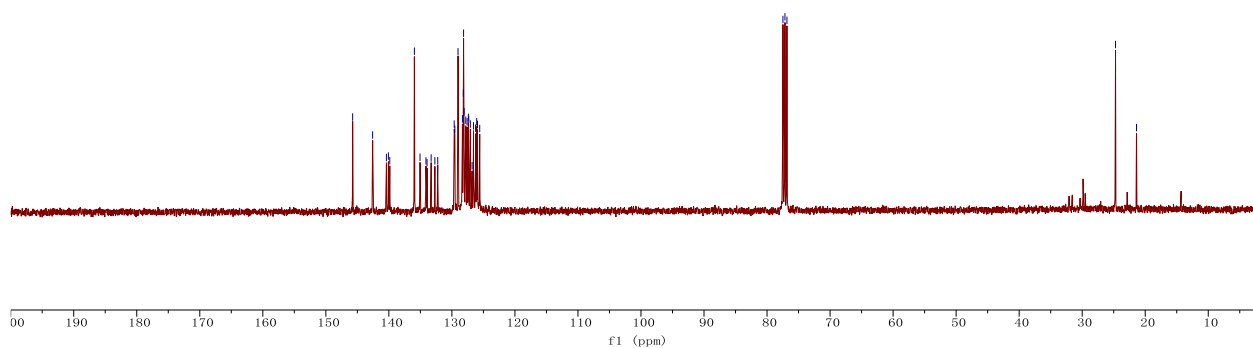

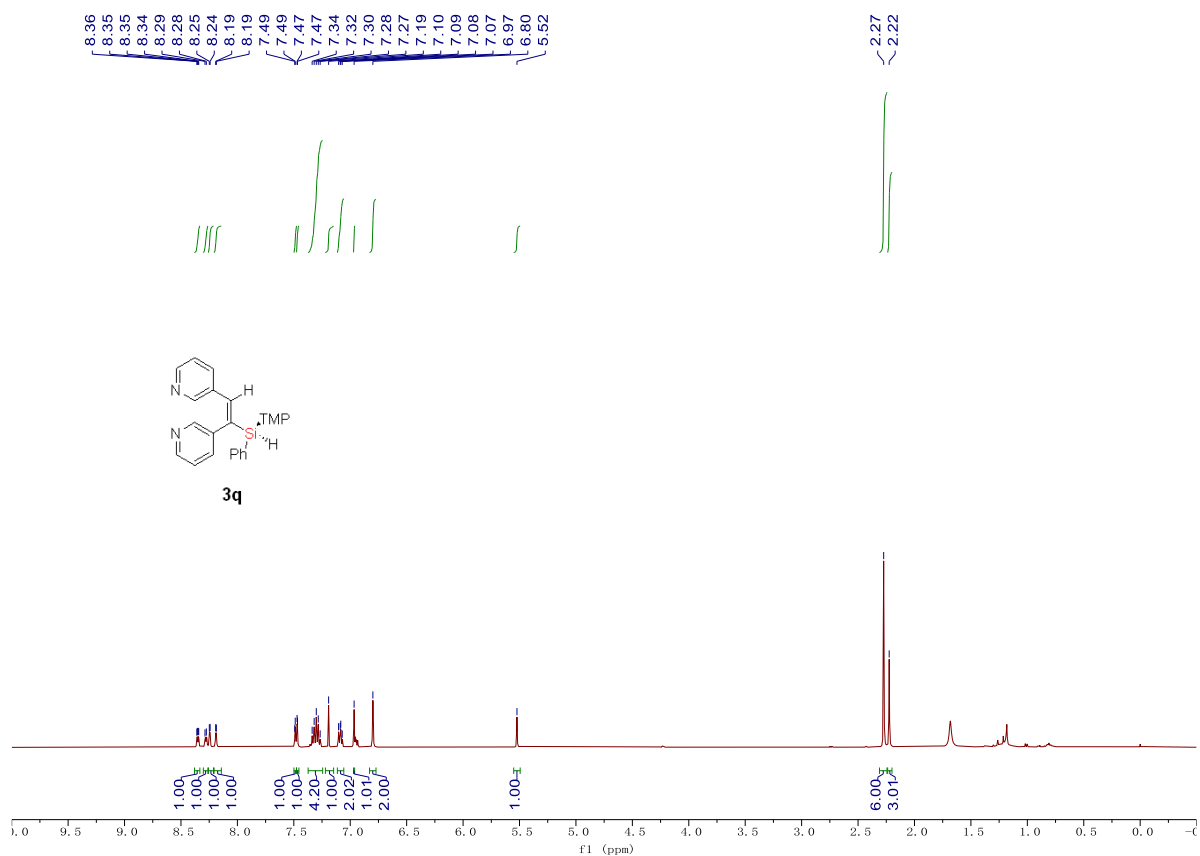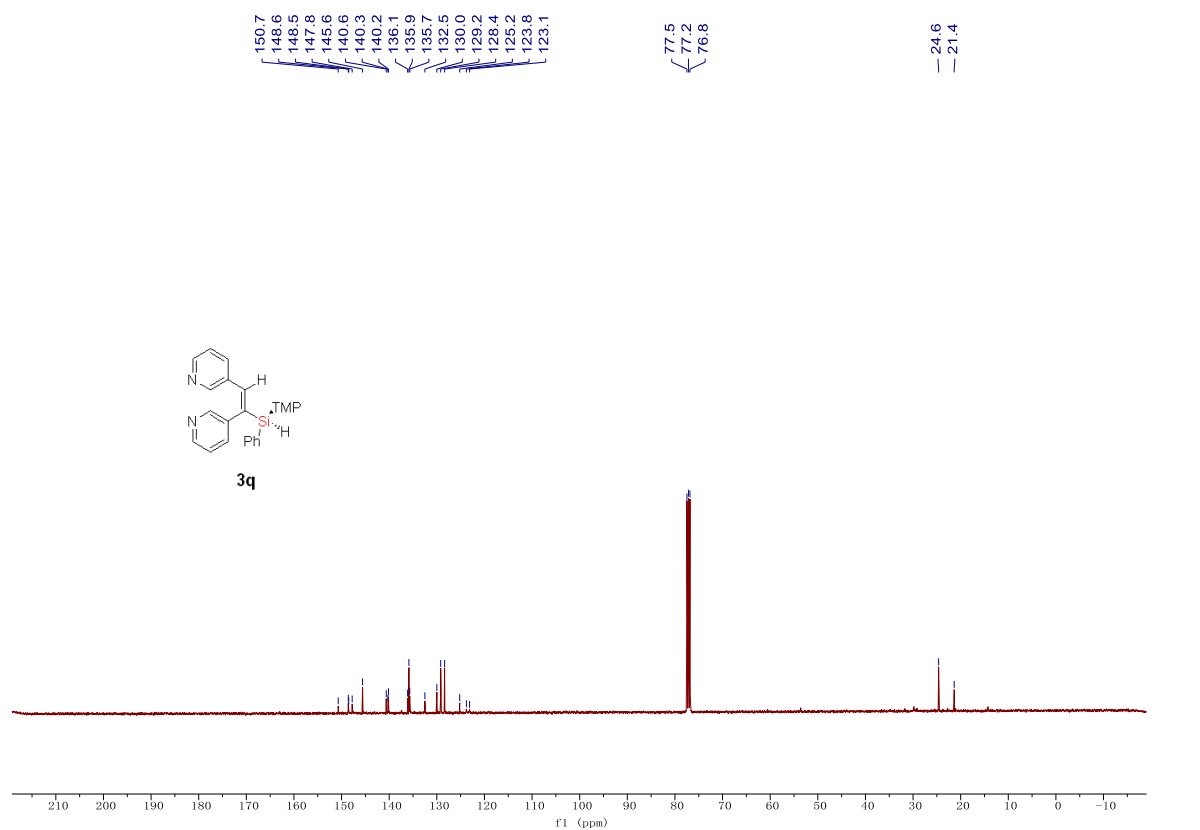

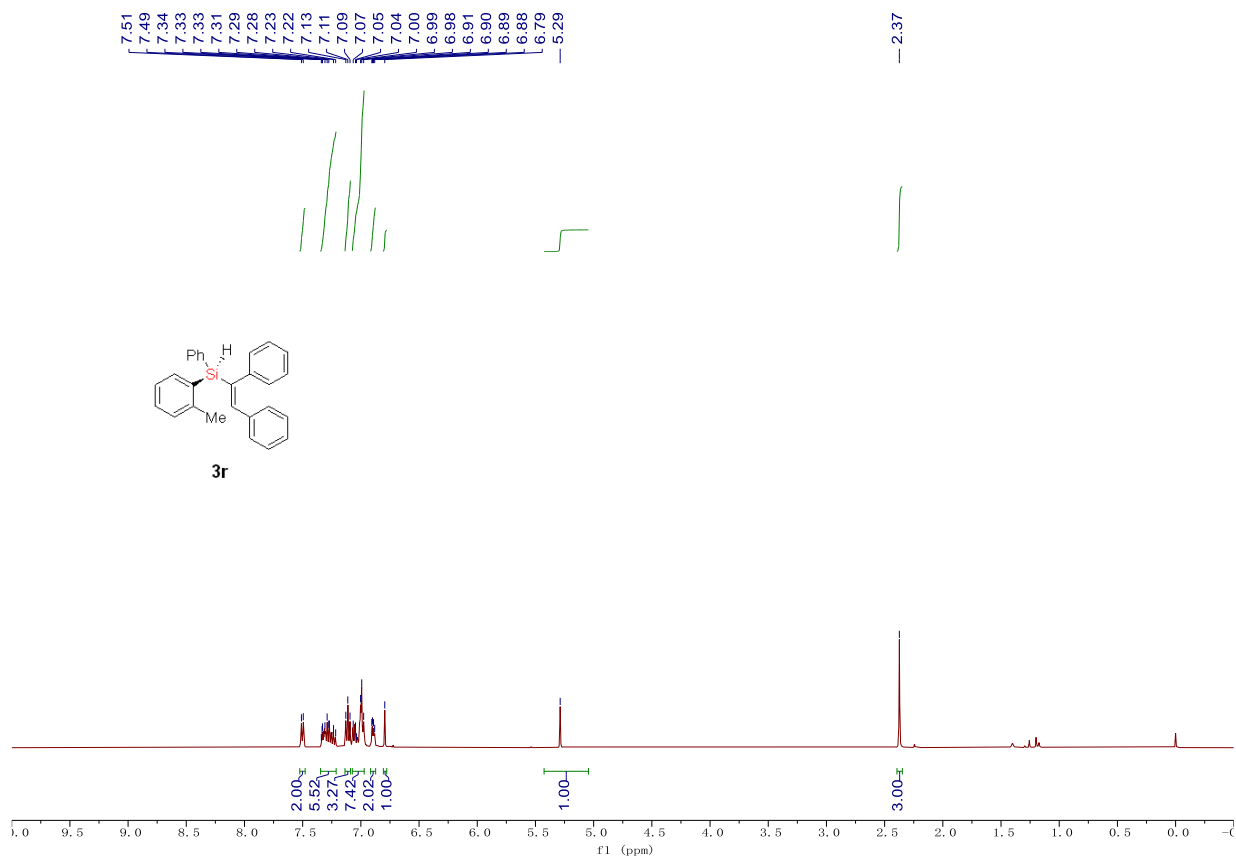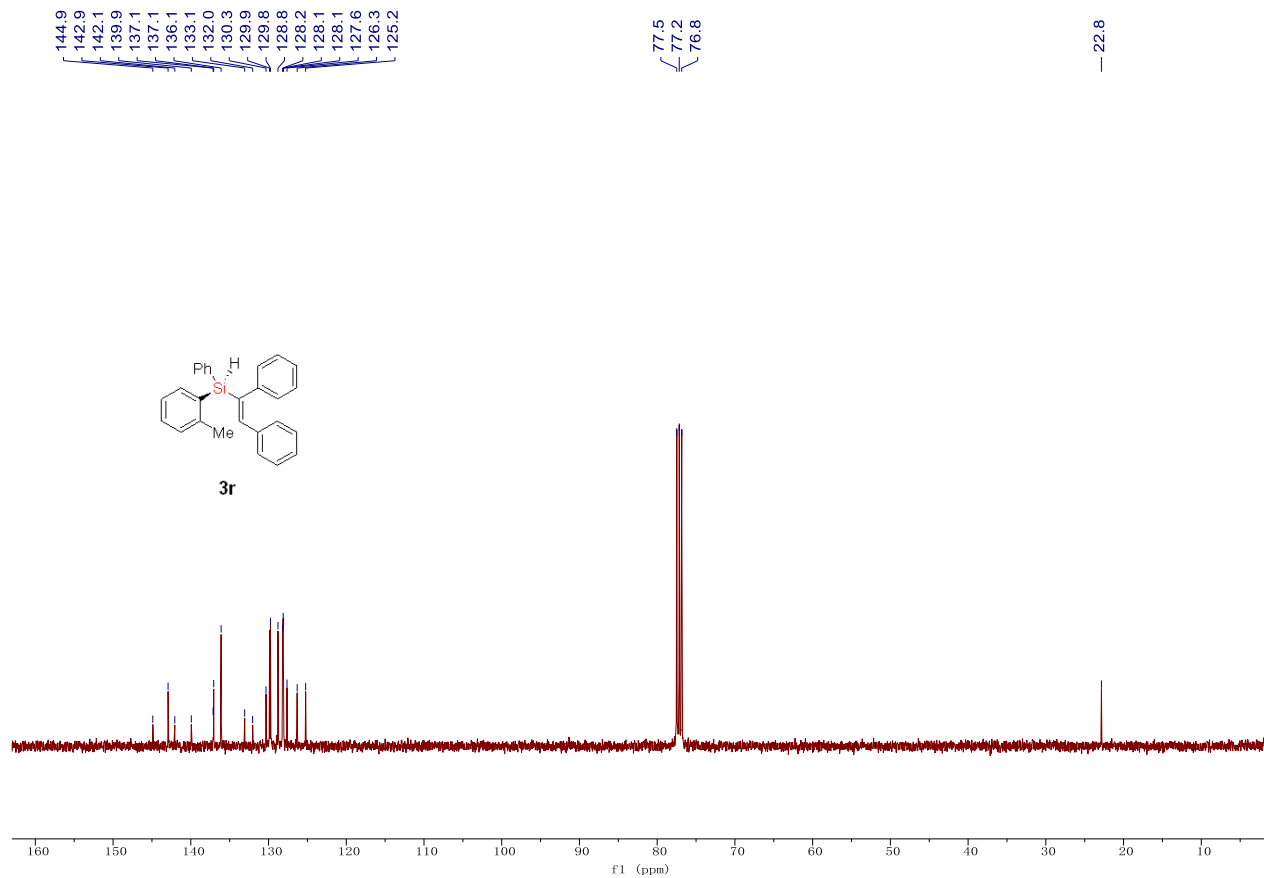

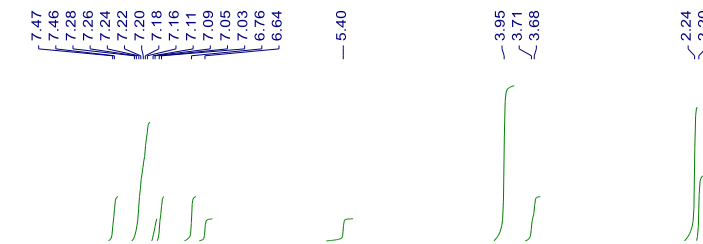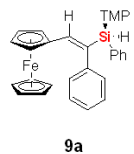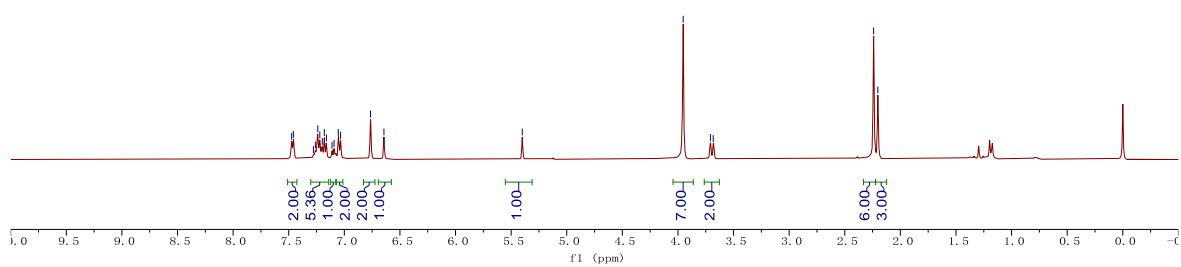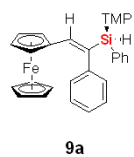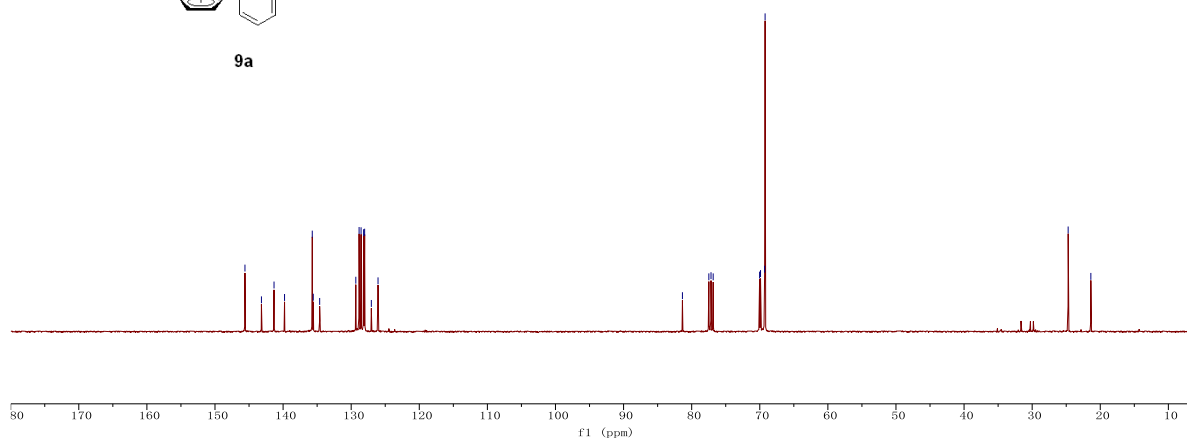

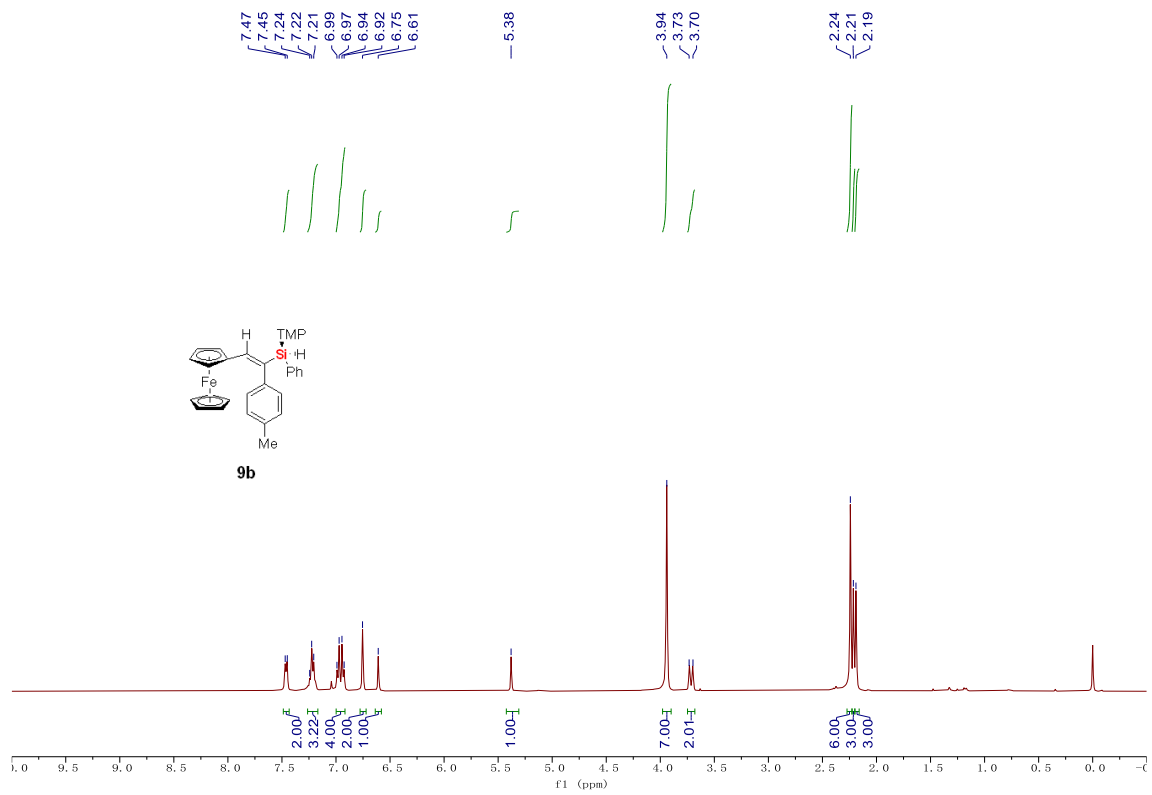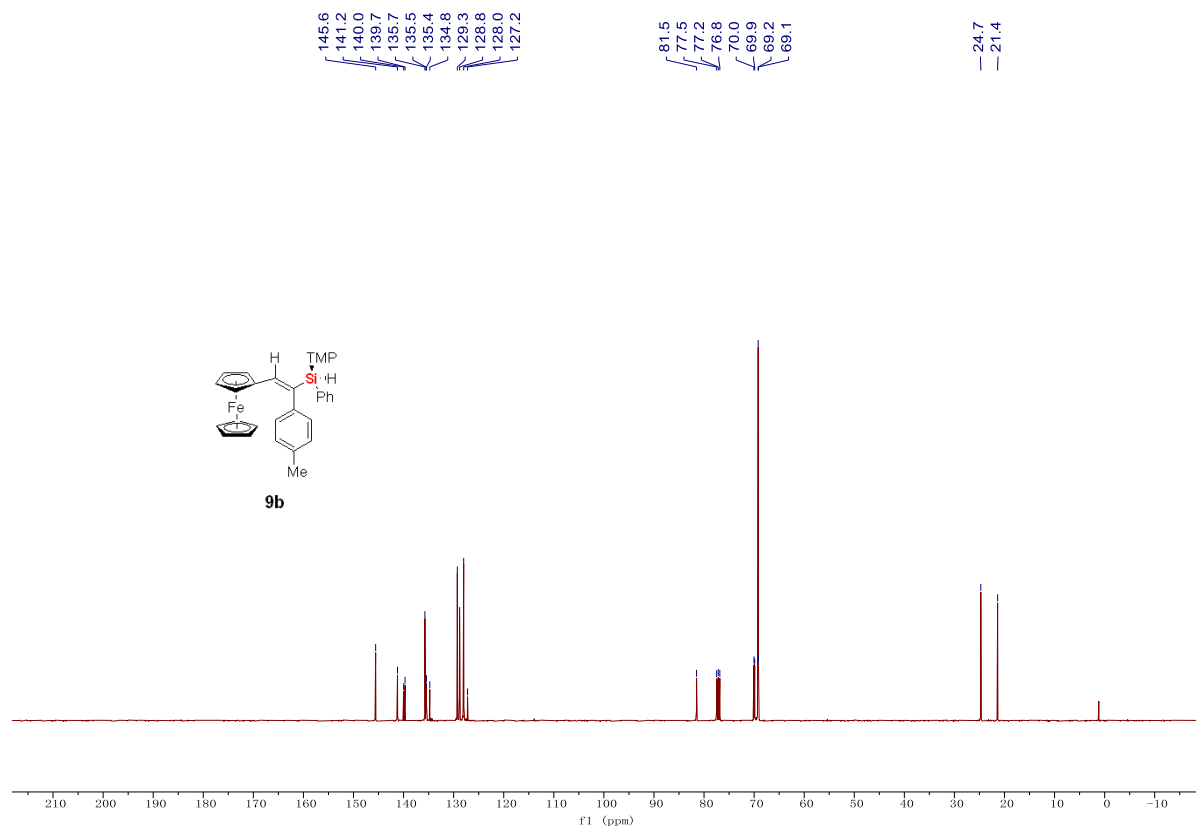



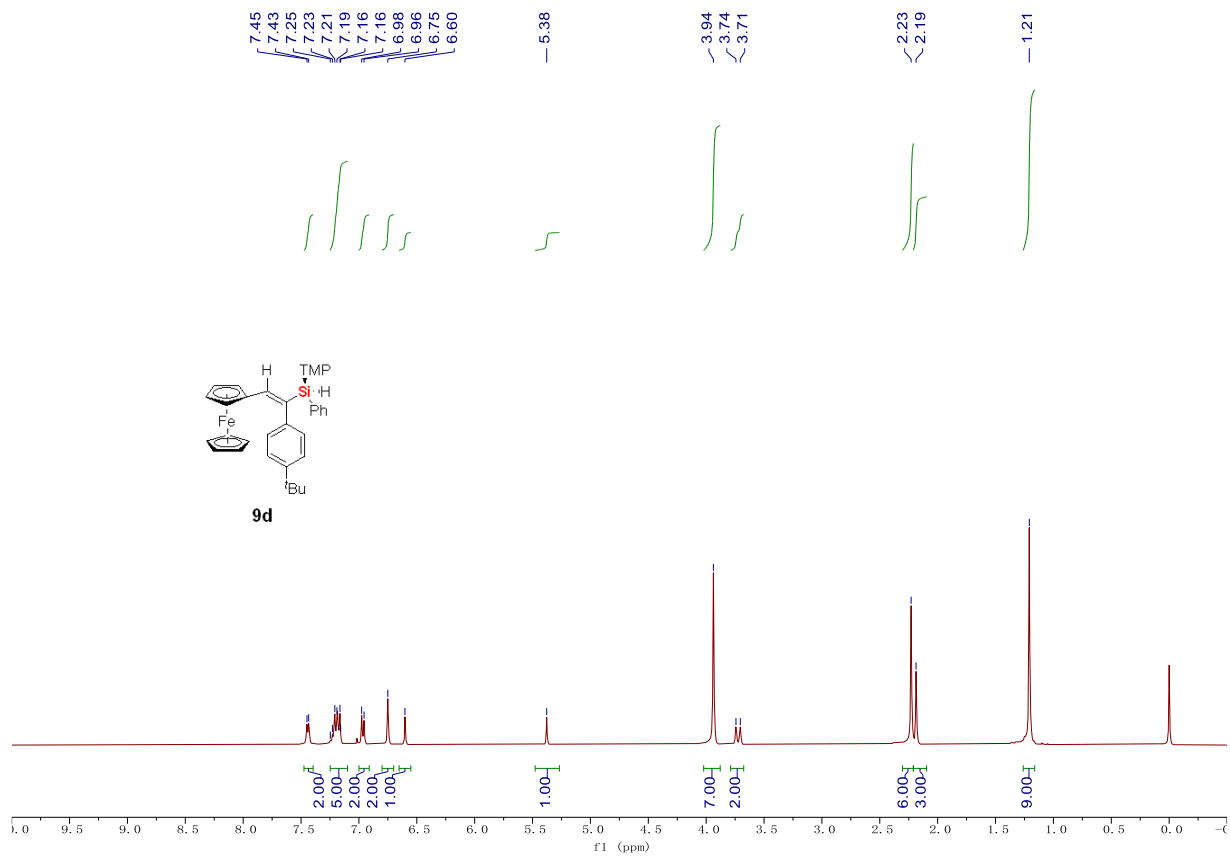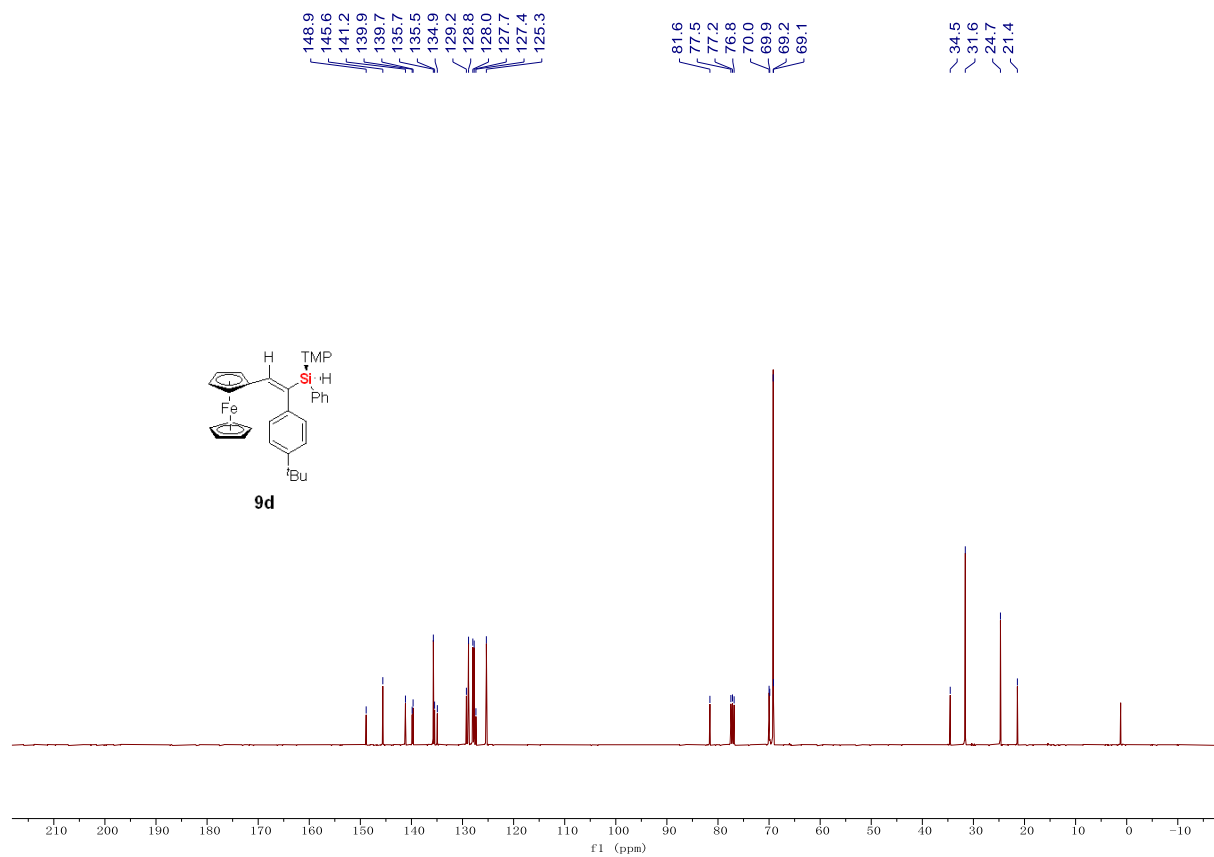



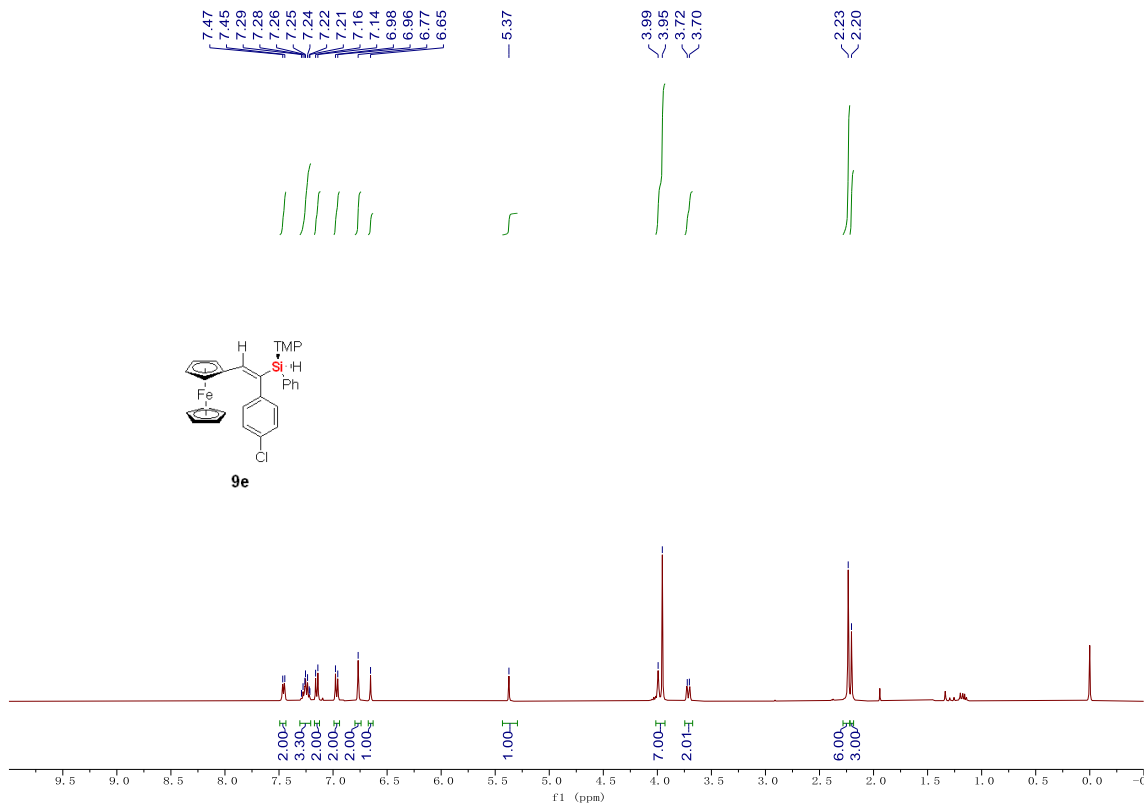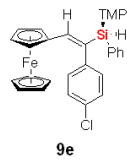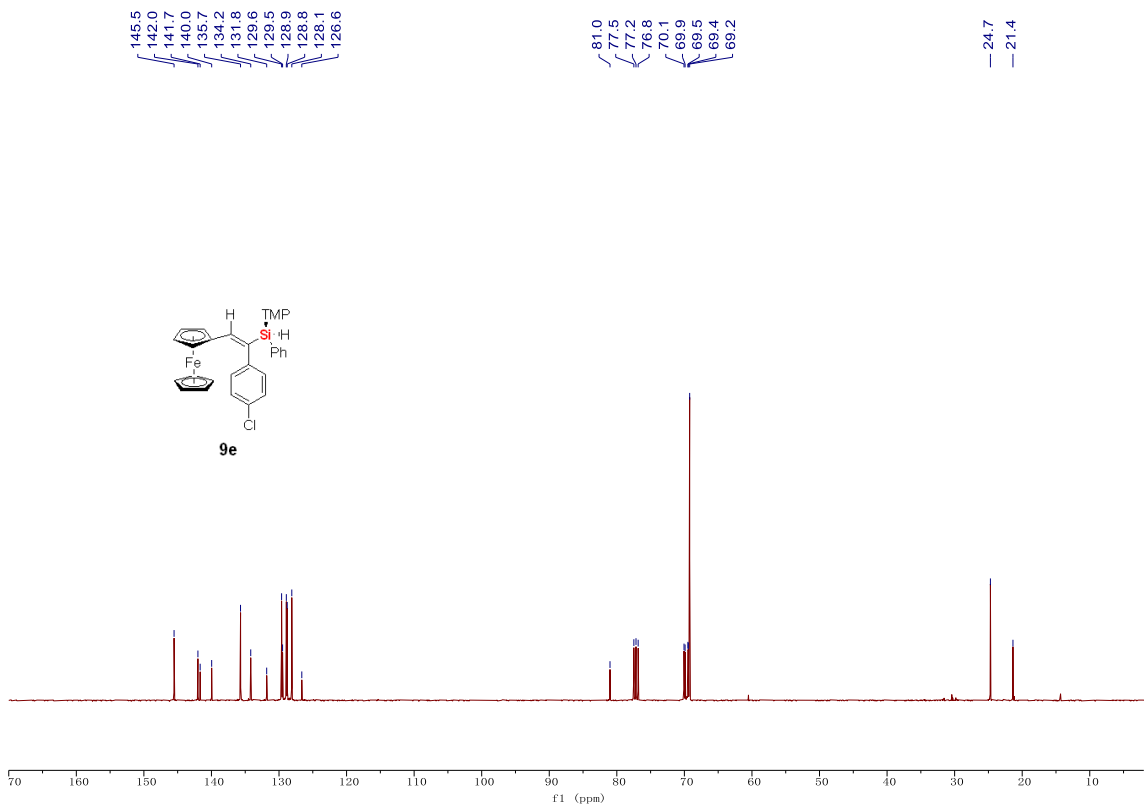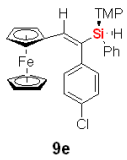

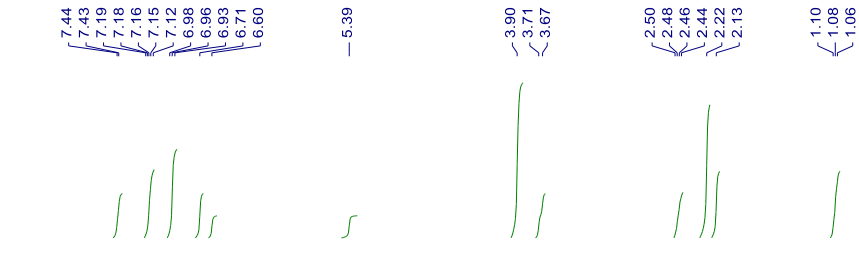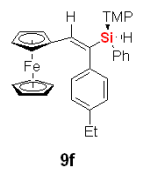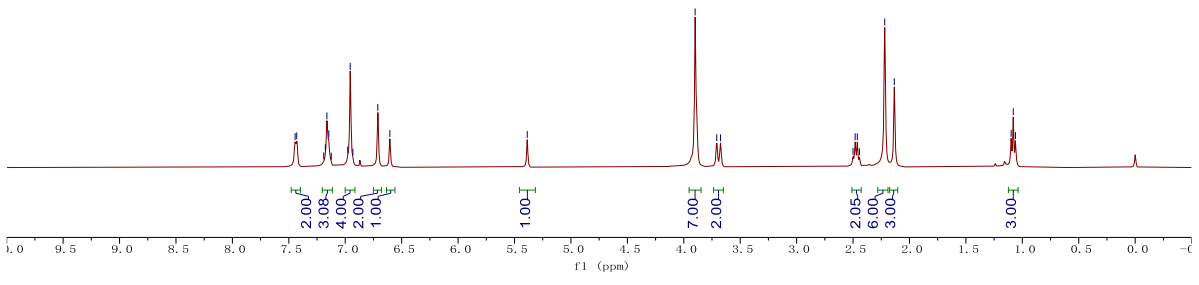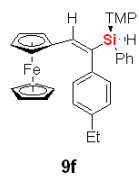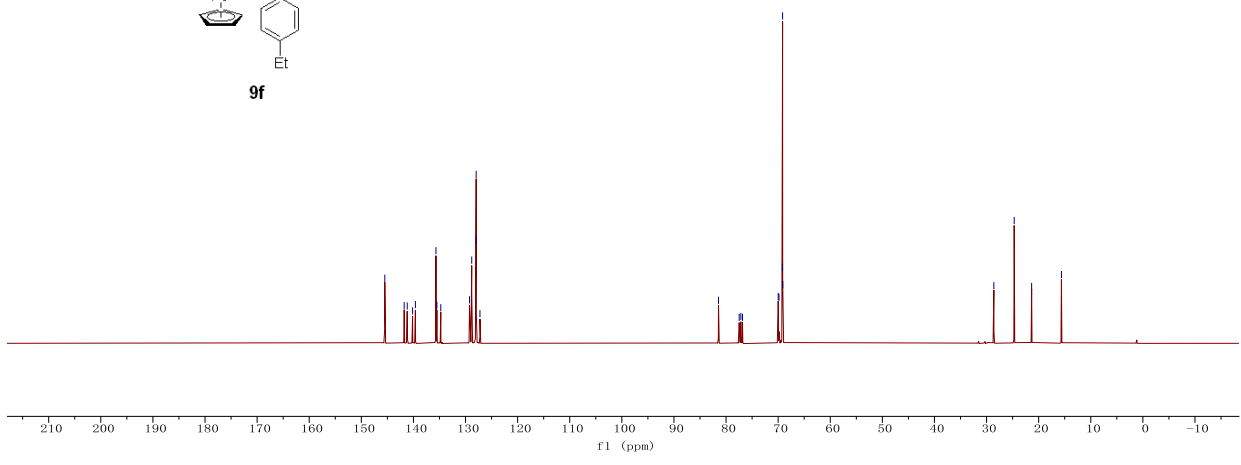

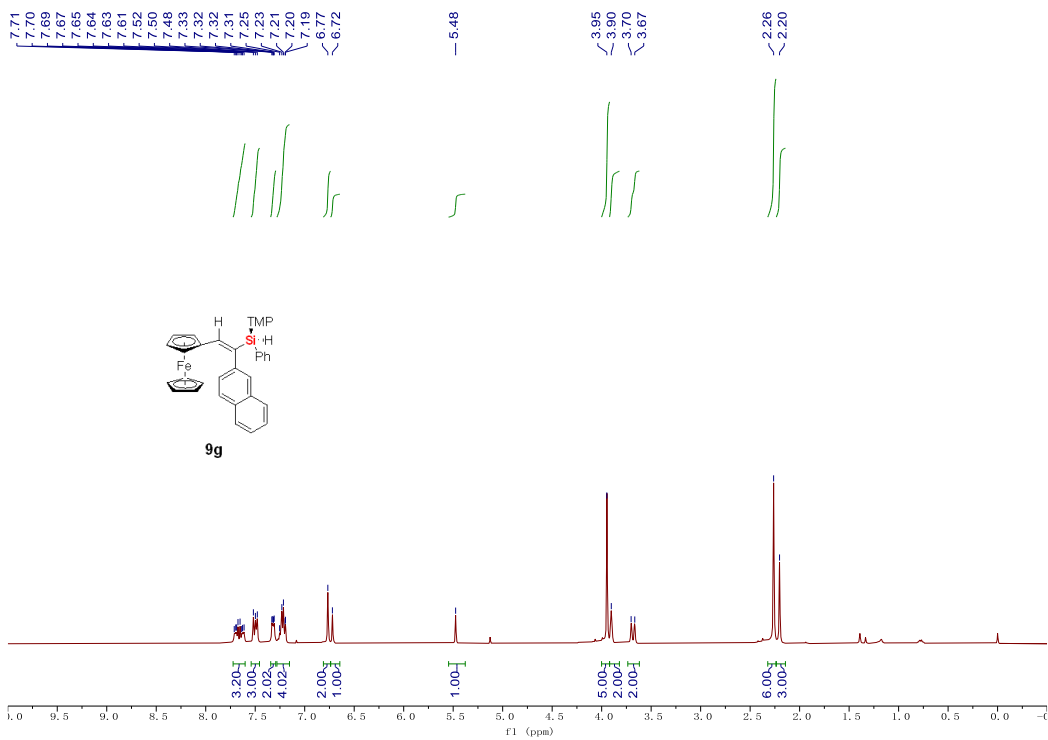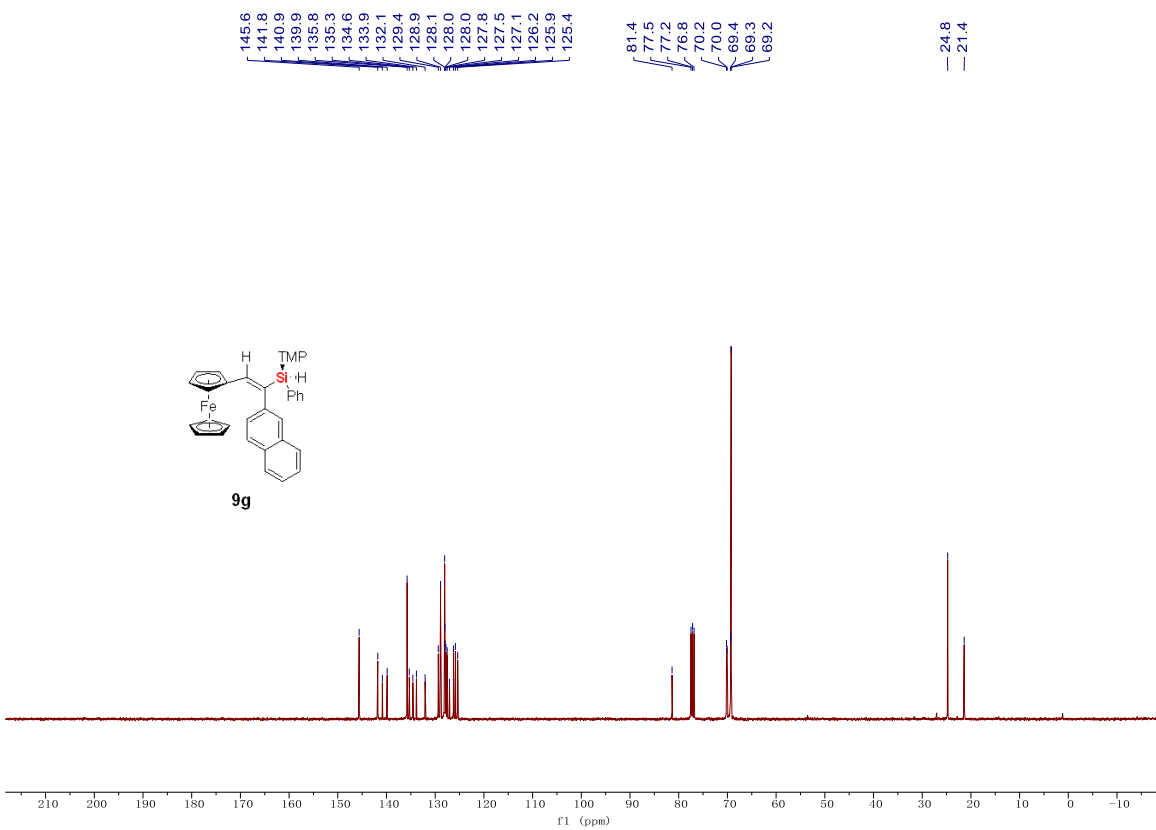

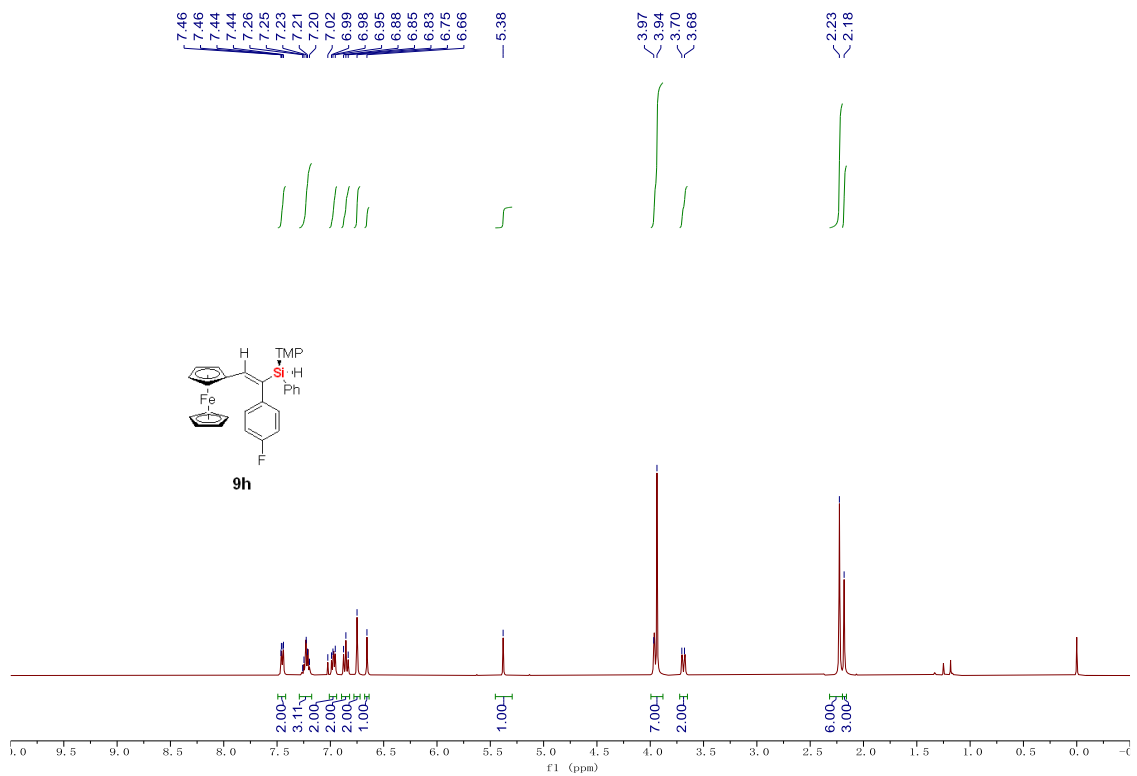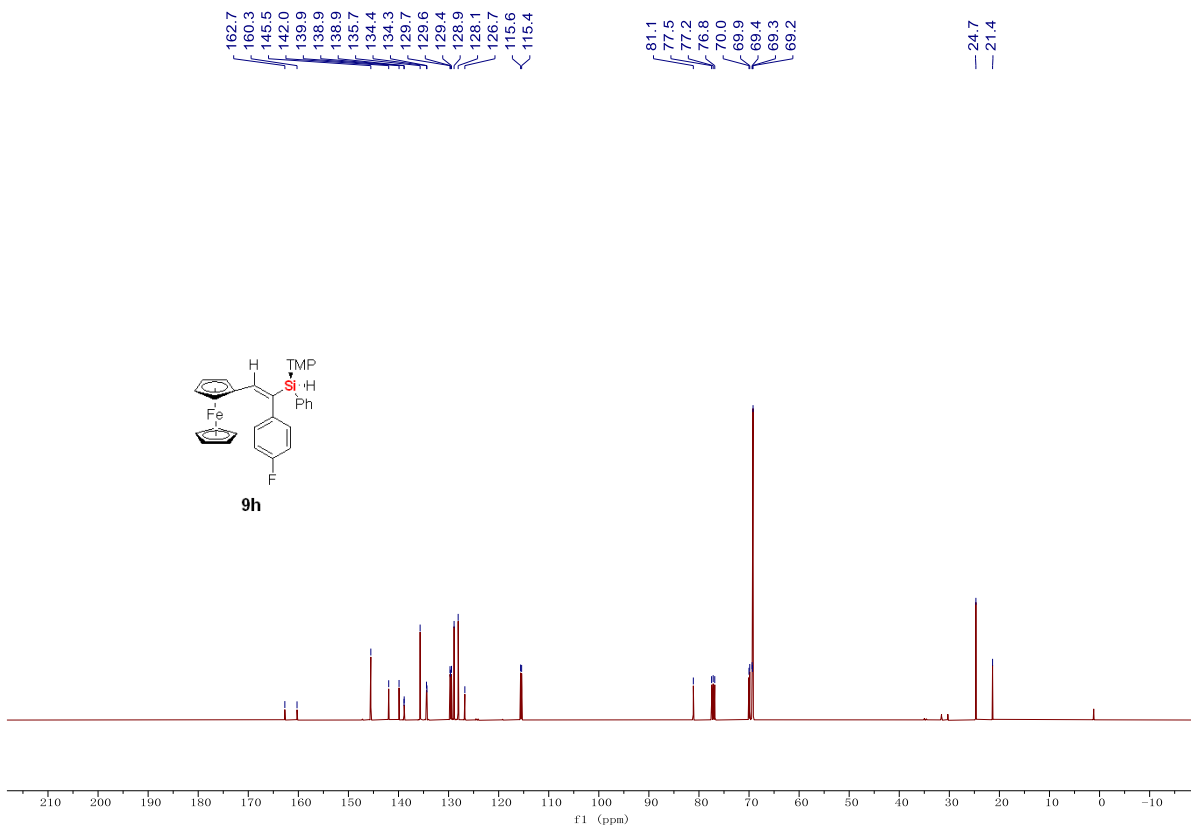

-116.9

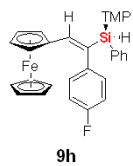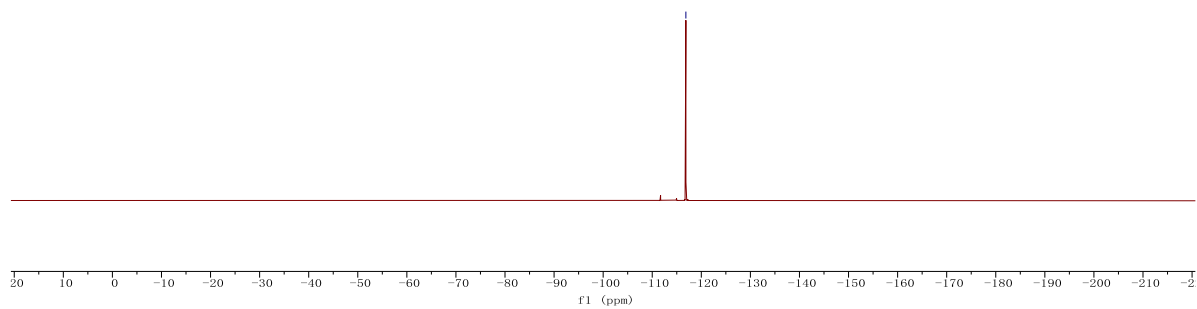

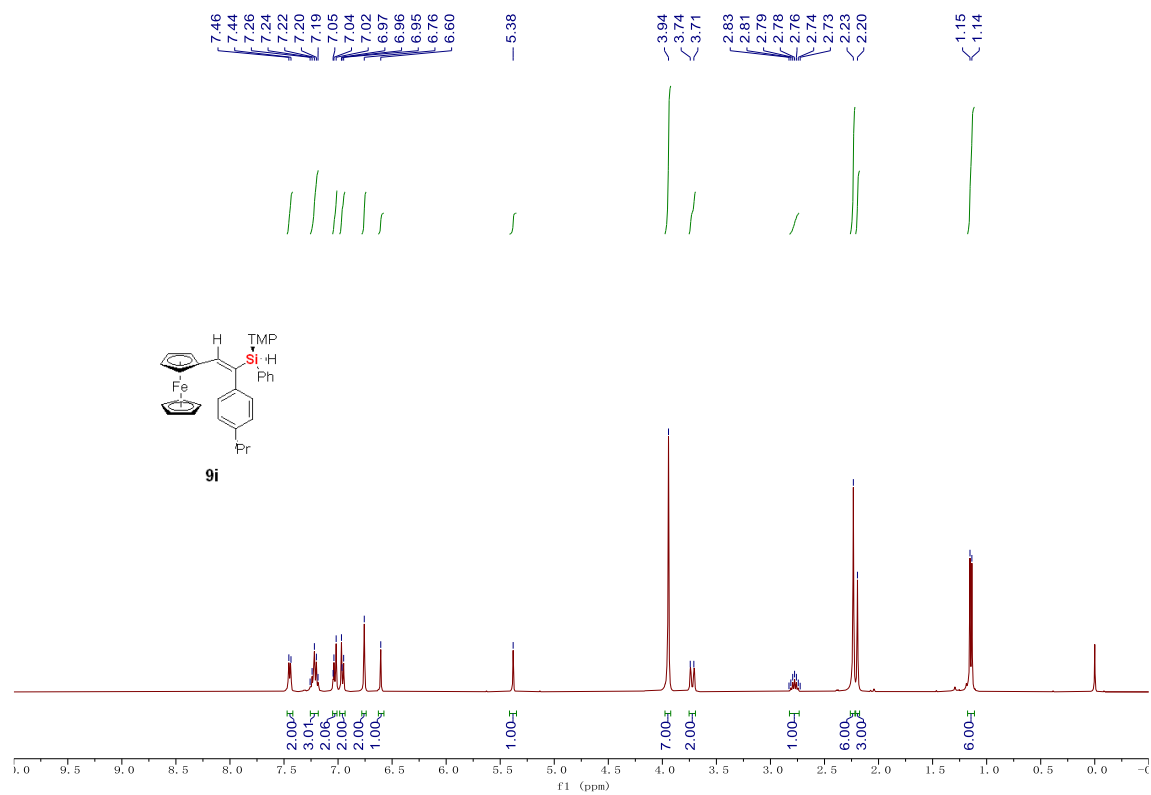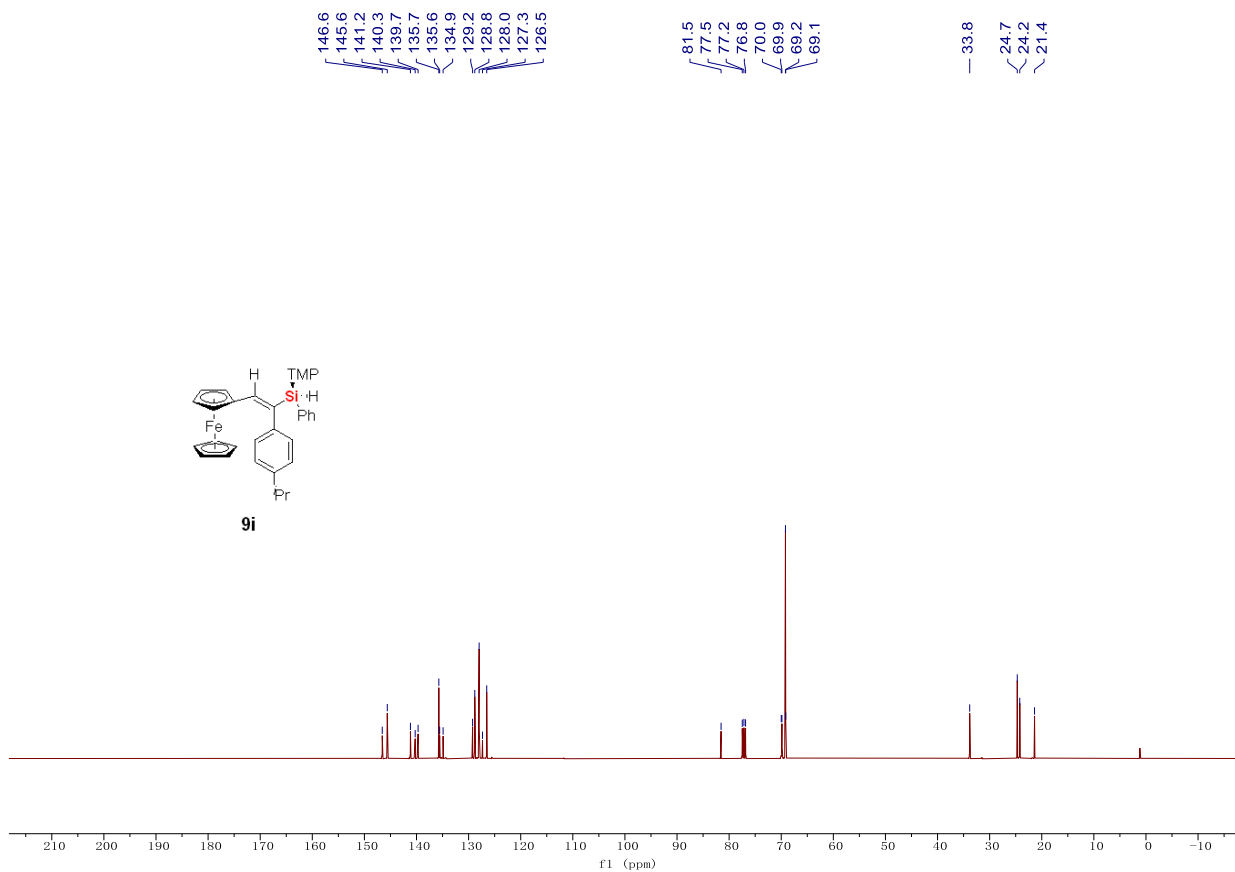

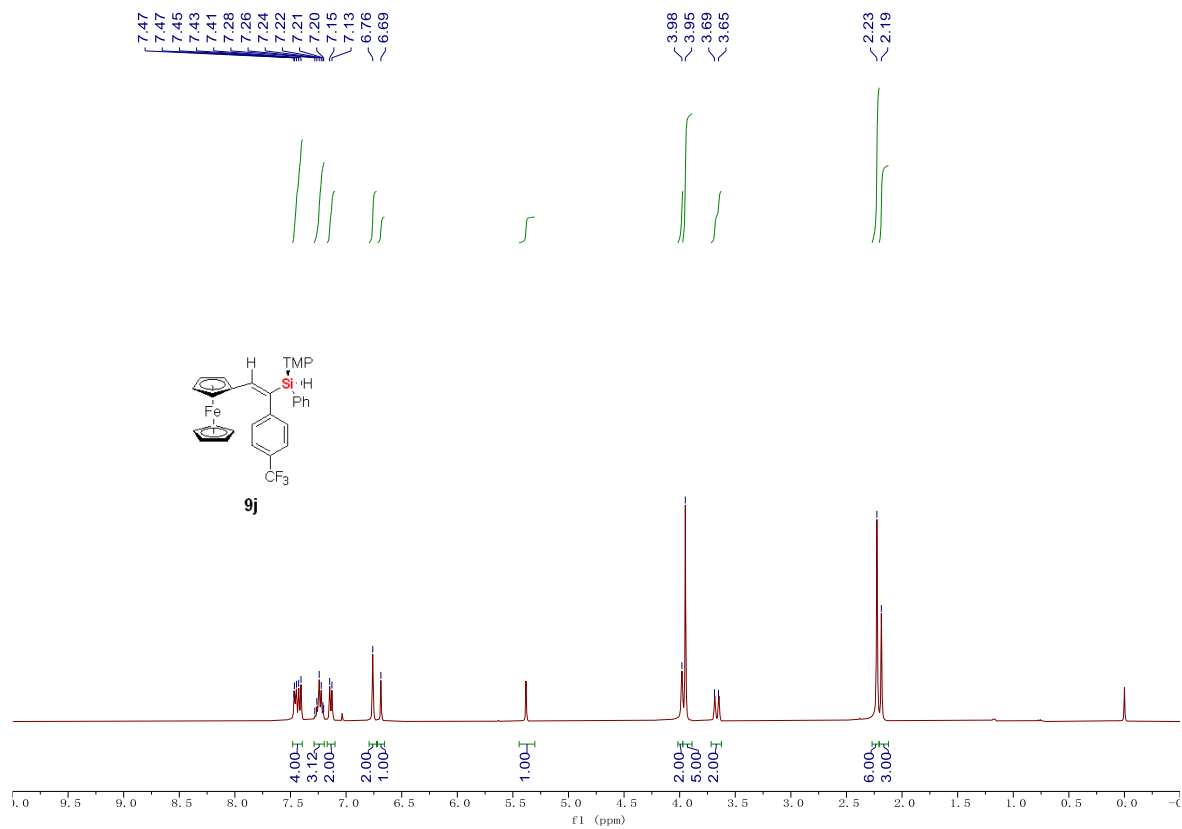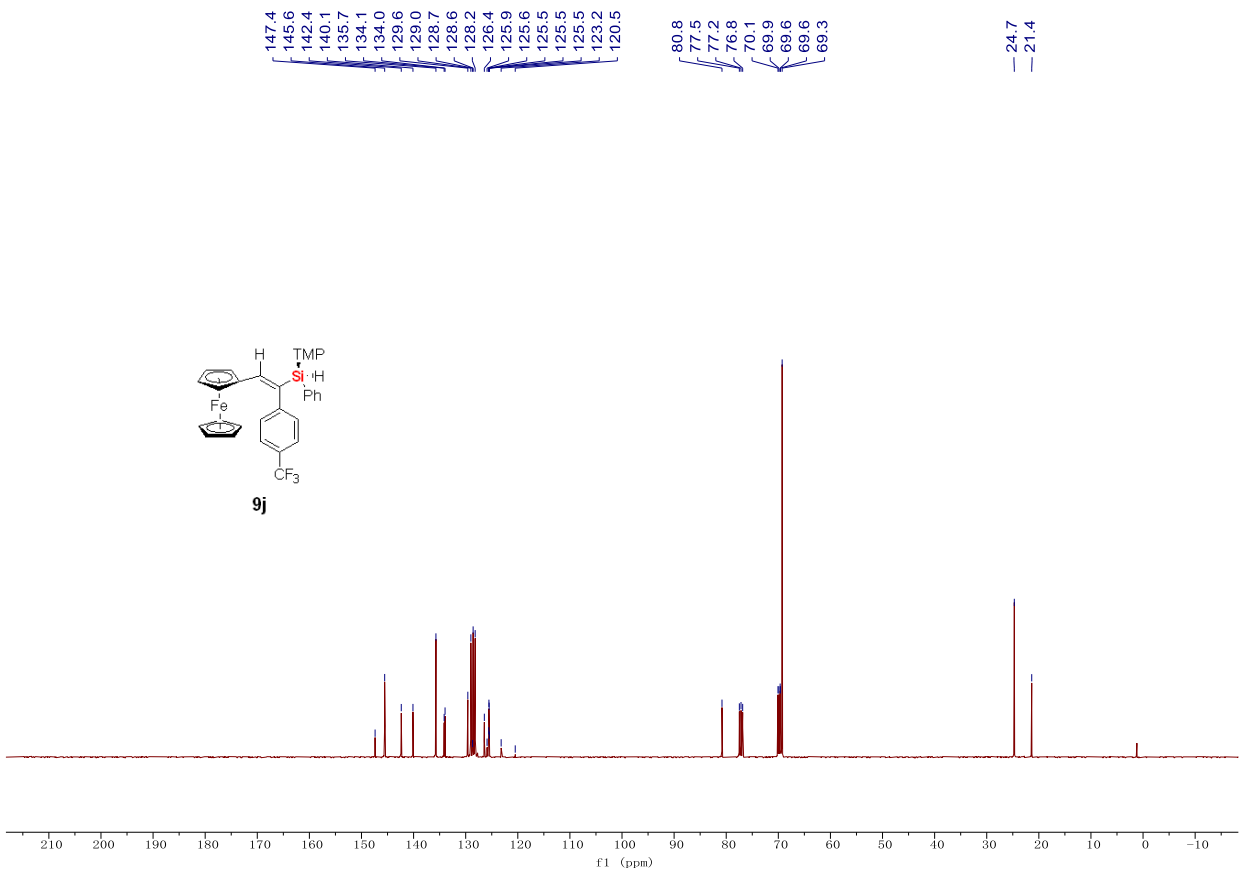

-61.9

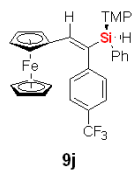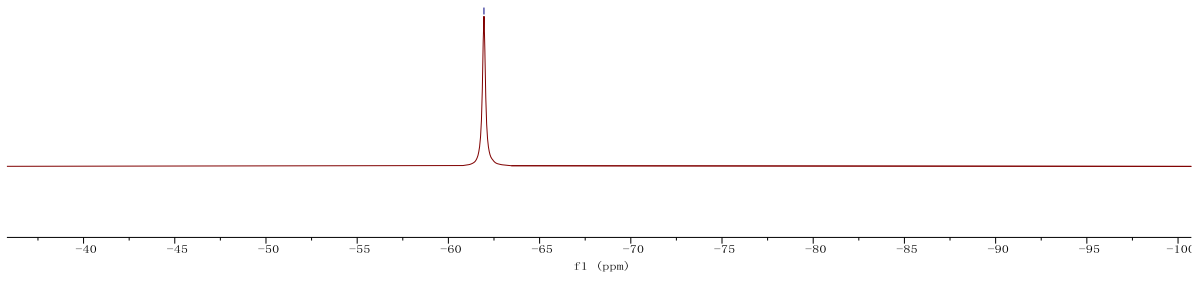



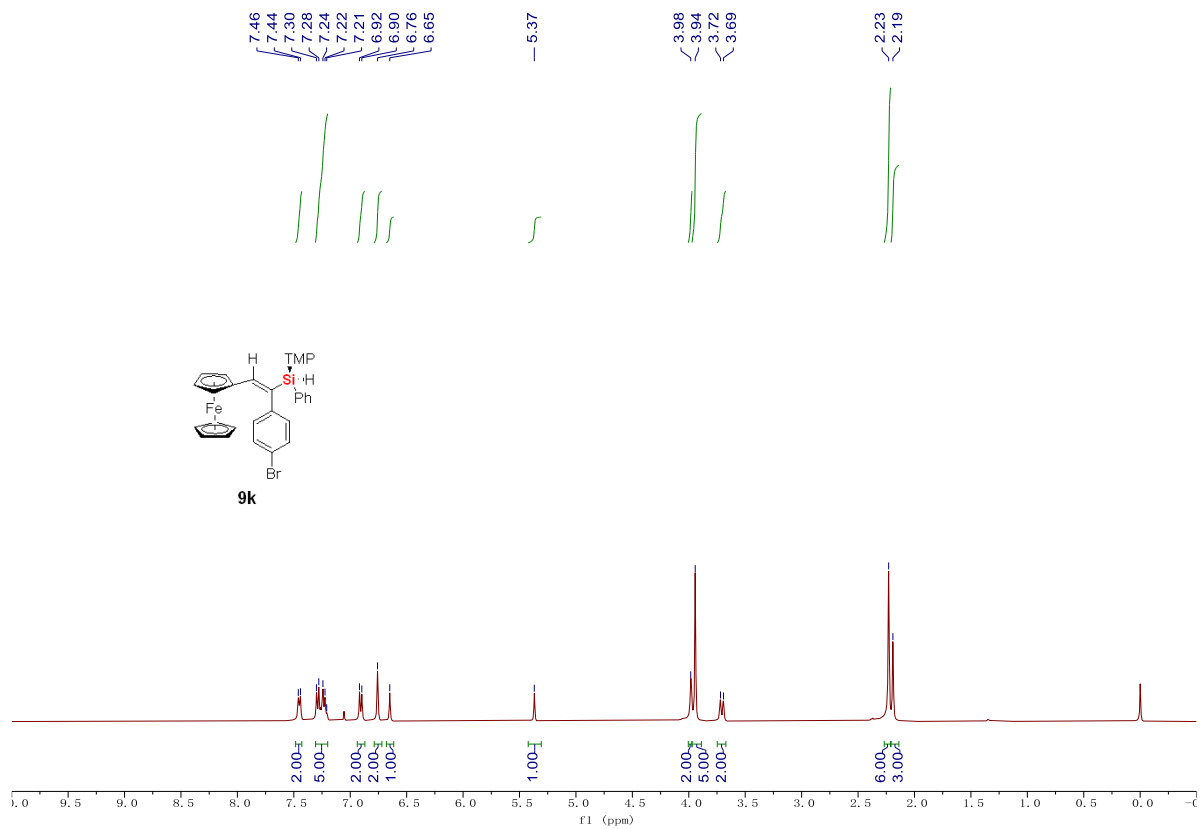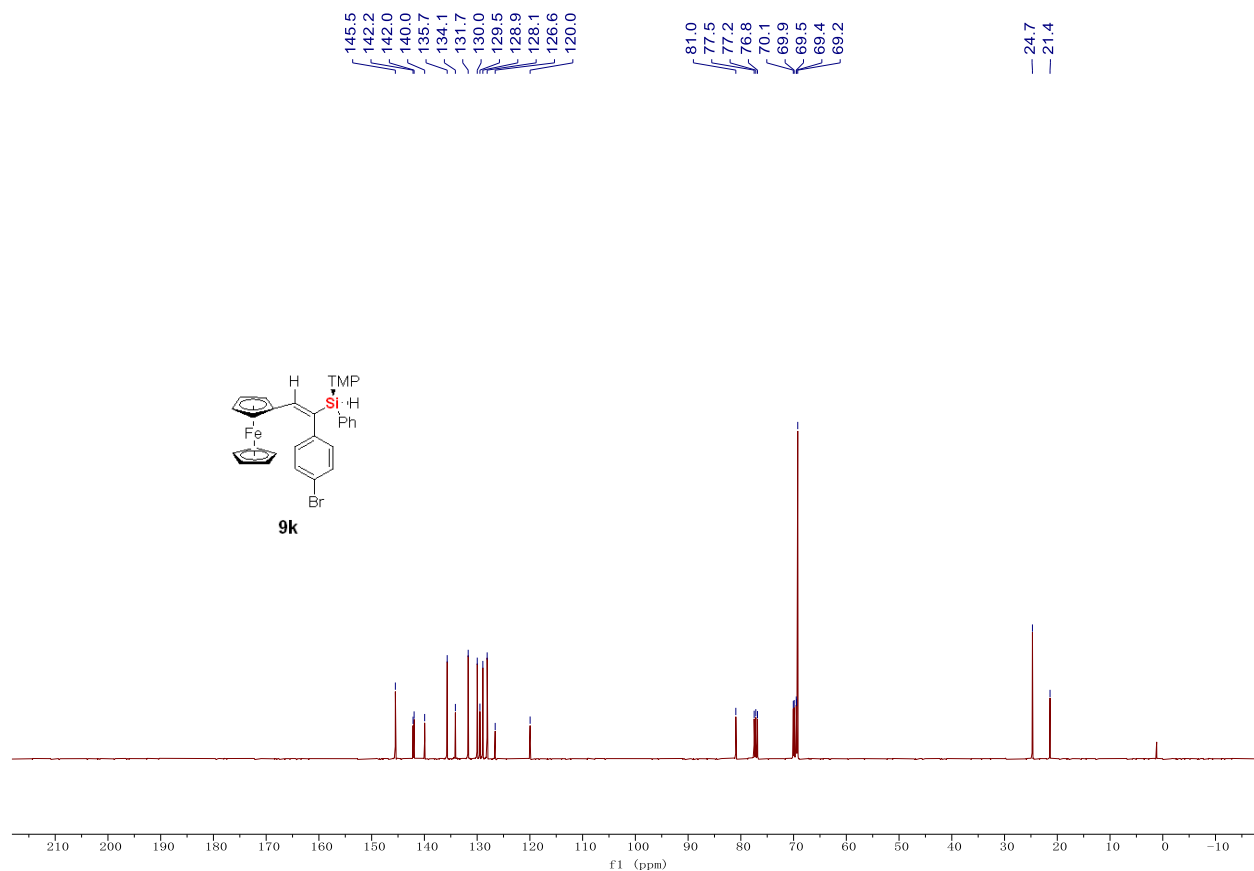

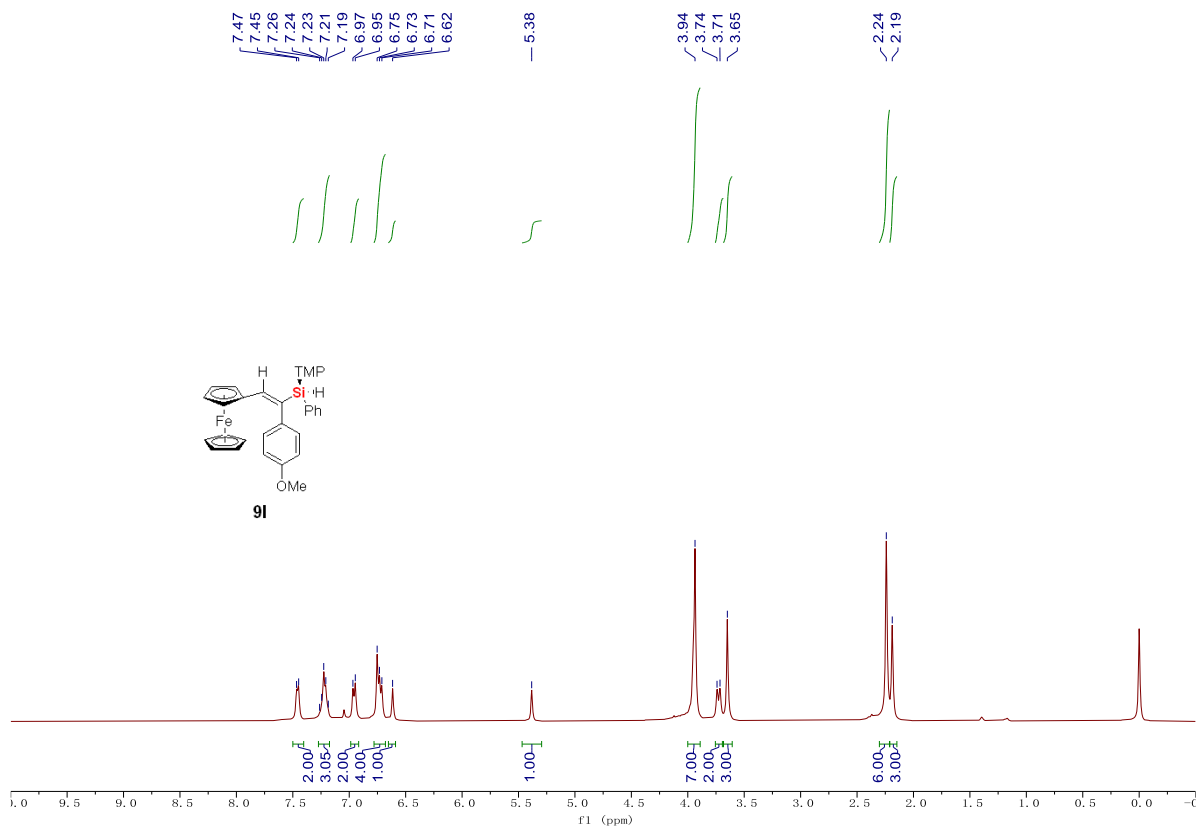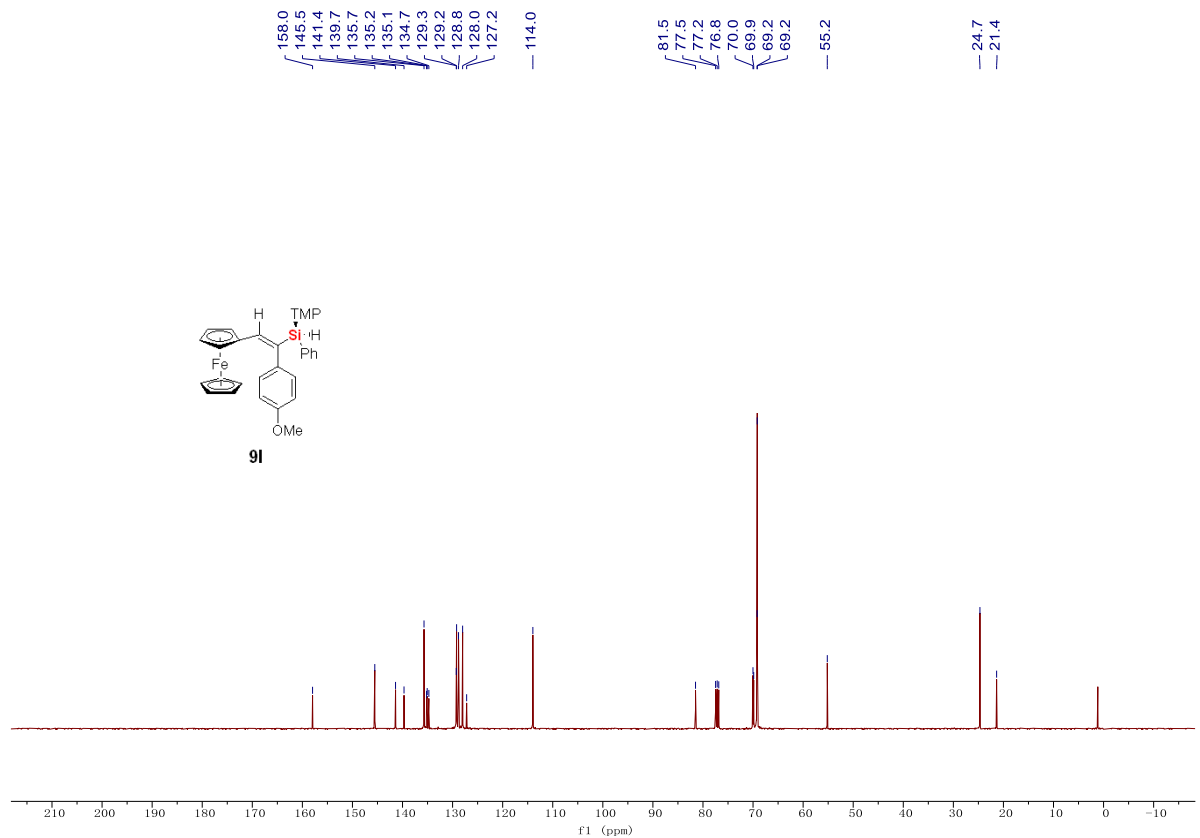

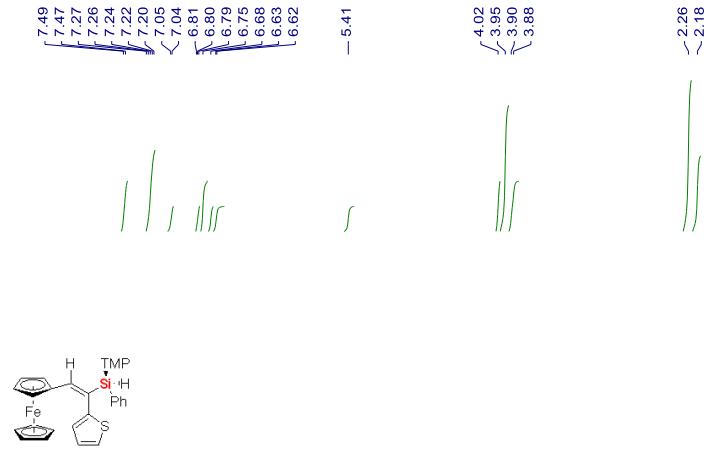

**9m**

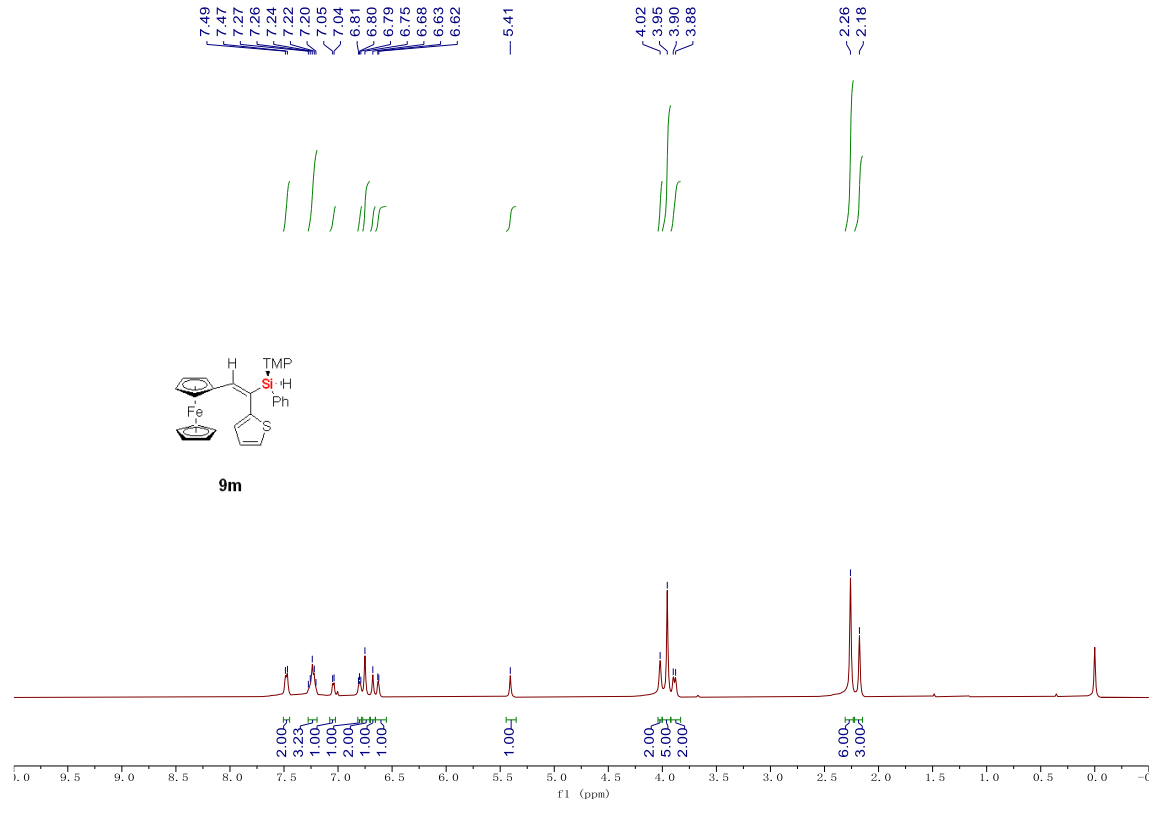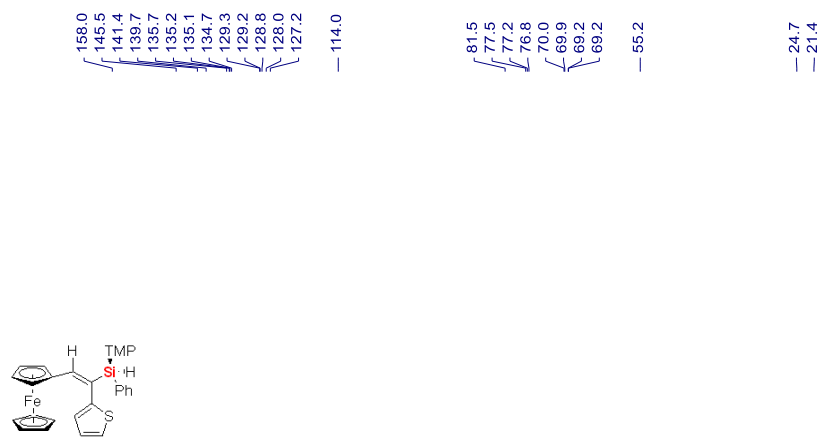

**9m**

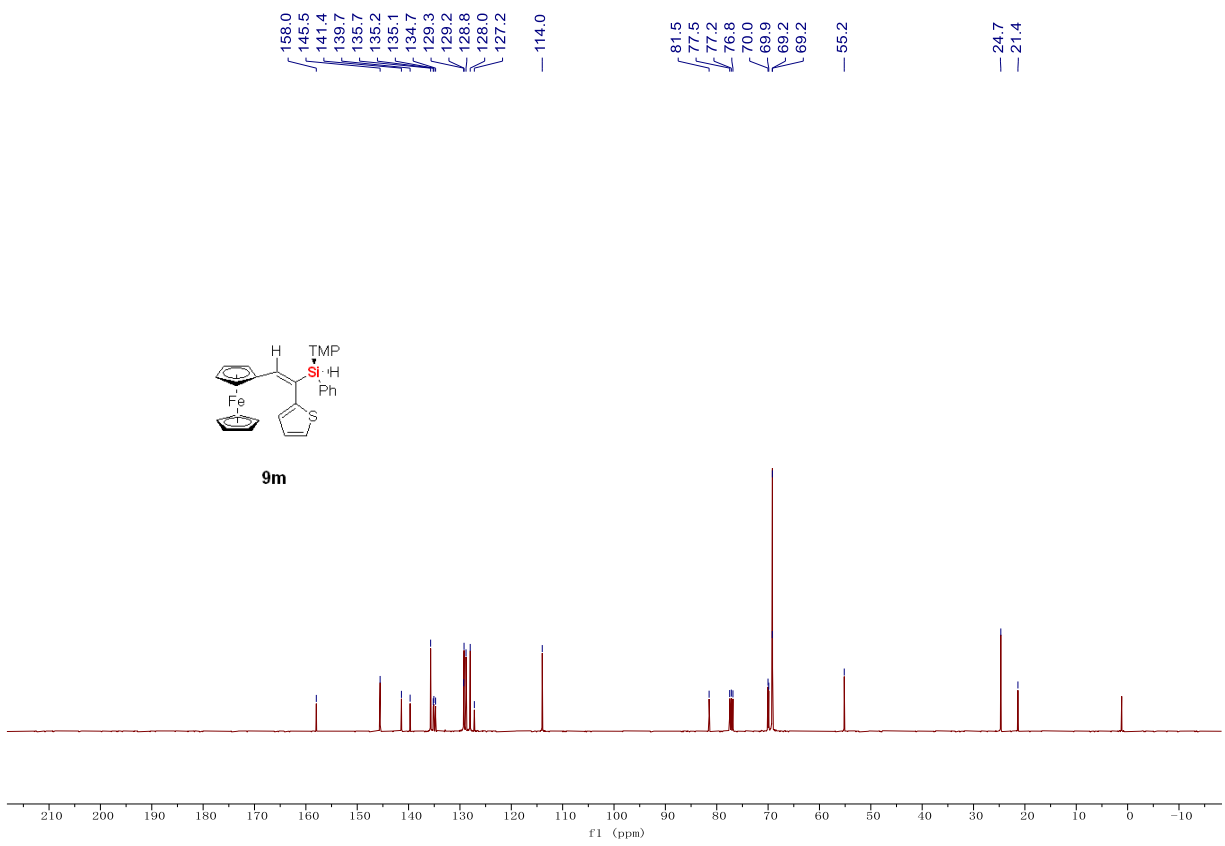

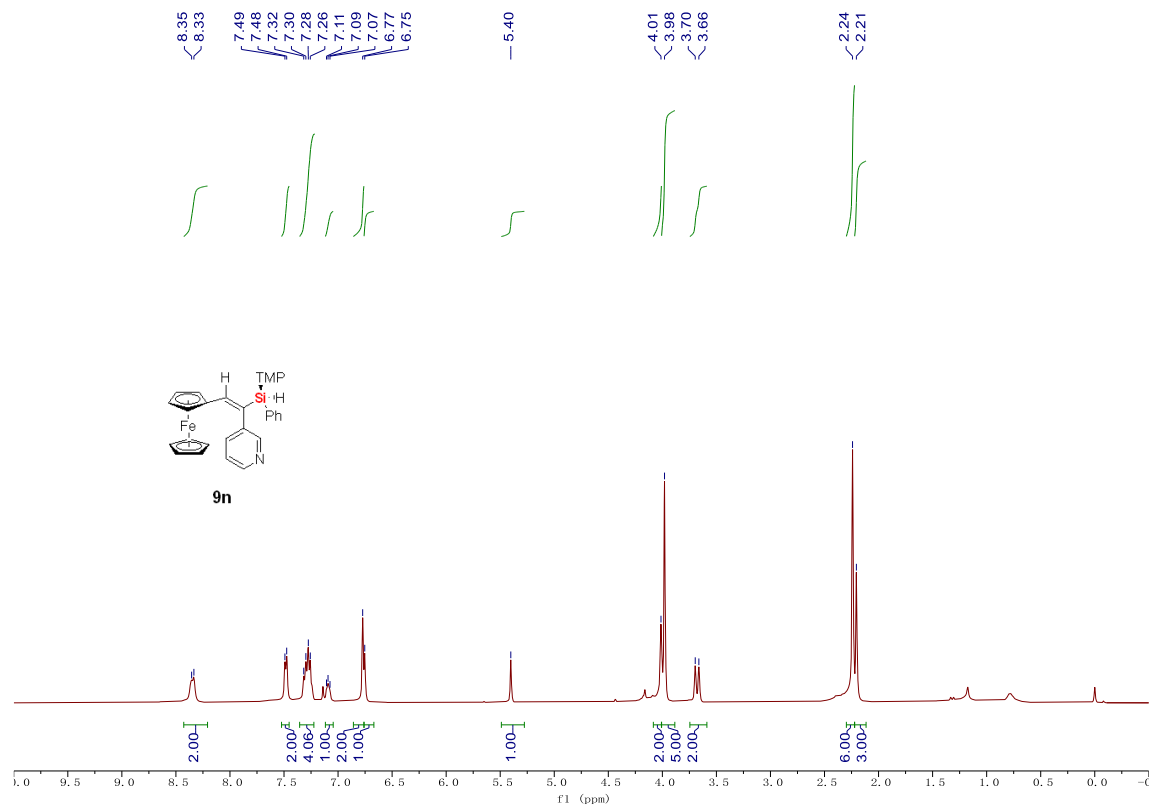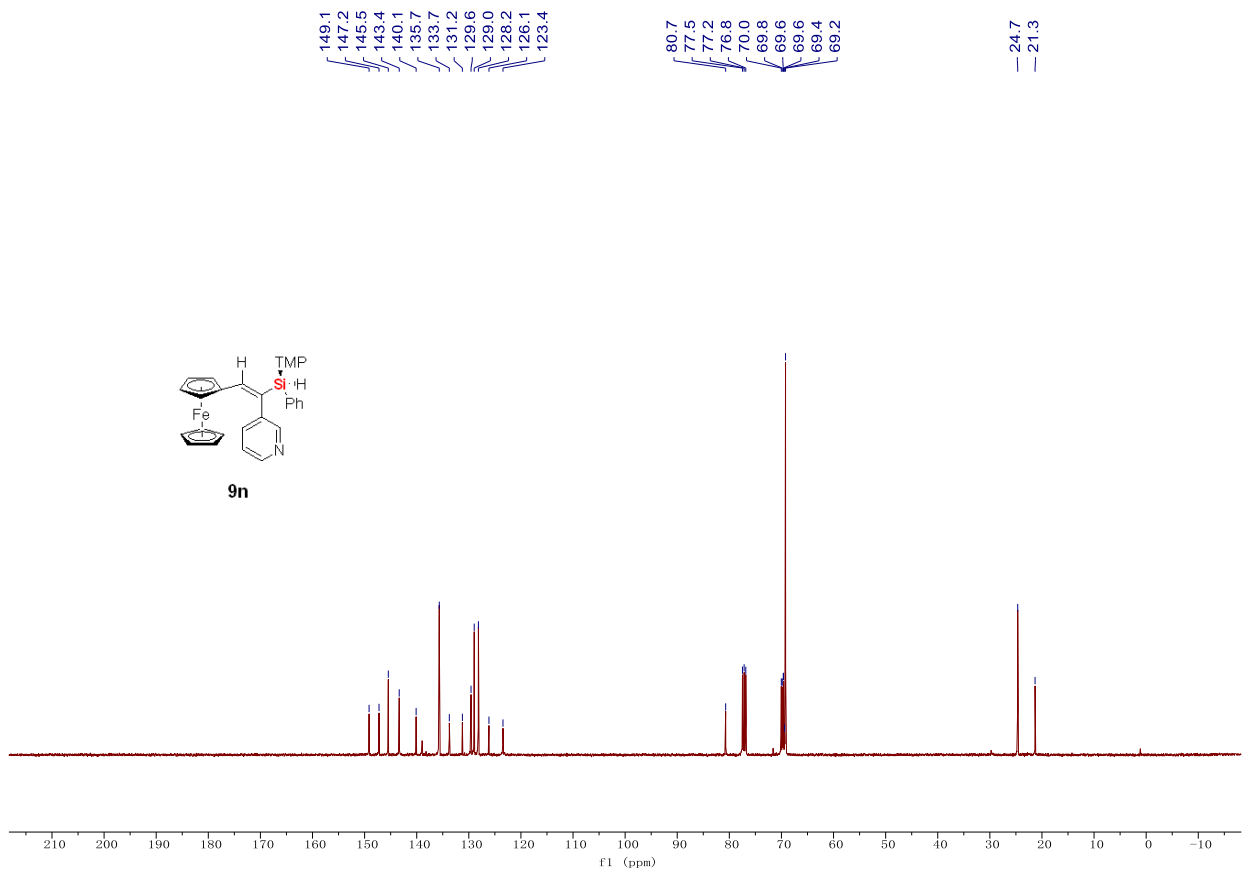

J

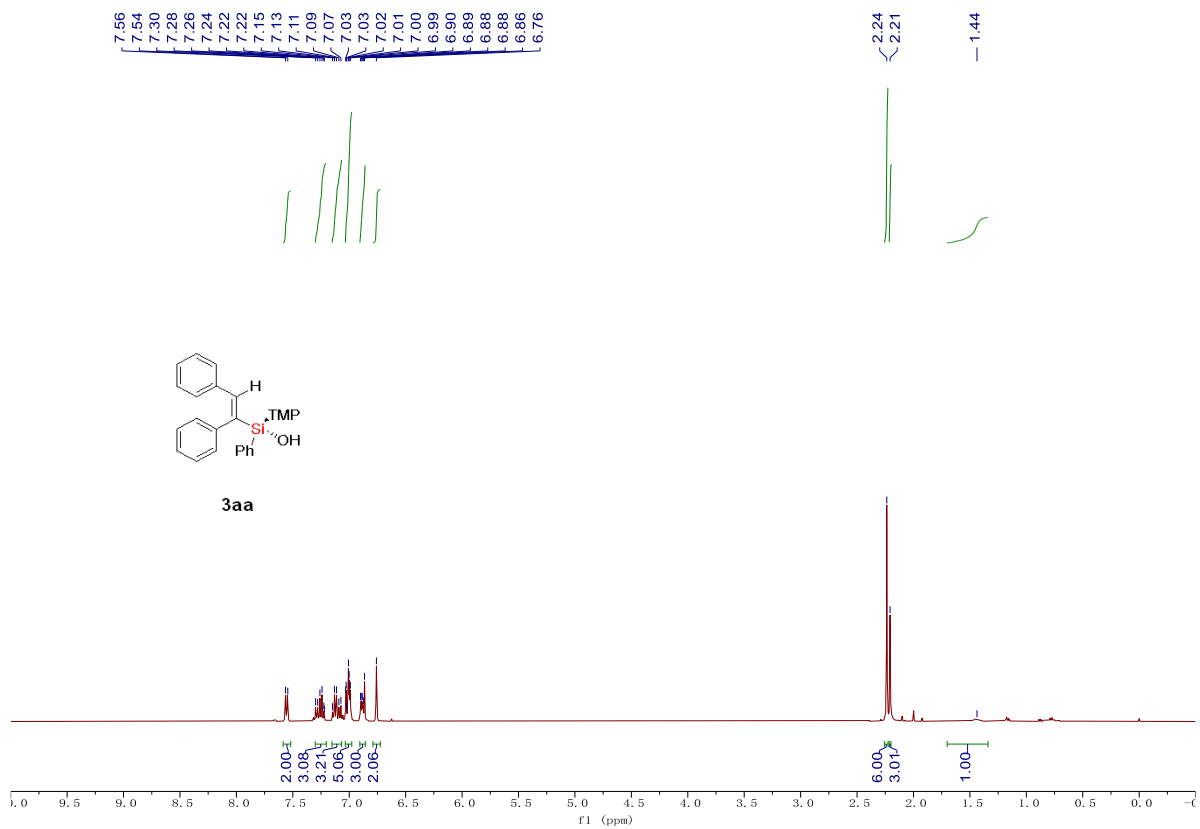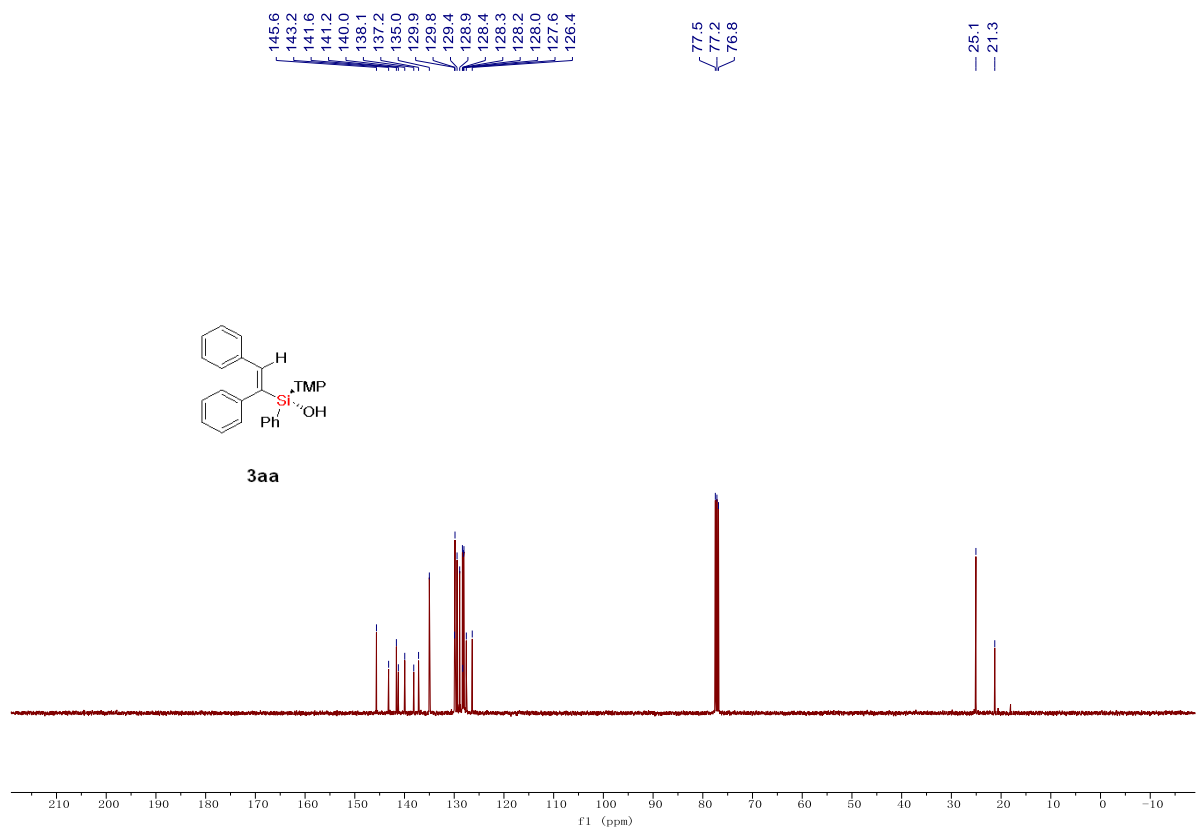

7.52  
7.50  
7.31  
7.29  
7.26  
7.24  
7.22  
7.16  
7.14  
7.12  
7.10  
7.07  
6.89  
6.83  
6.80  
6.68  
6.60  
6.78

2.23  
2.22  
2.19  
2.18

0.48

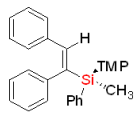

3ab

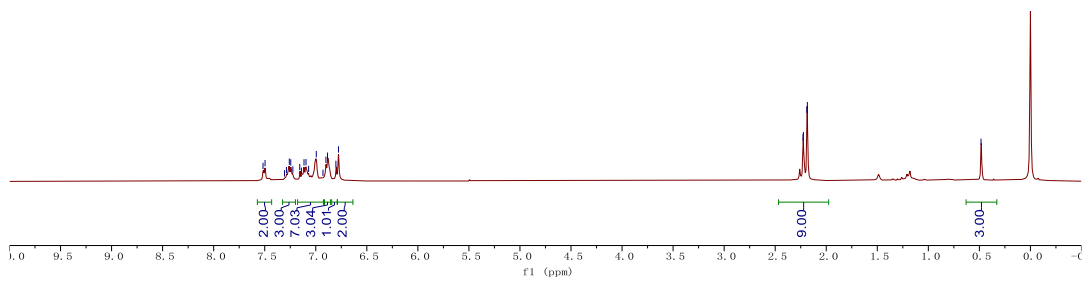

145.8  
144.4  
142.3  
140.5  
139.4  
139.4  
137.6  
135.9  
135.3  
129.9  
129.7  
129.5  
128.3  
128.1  
128.9  
128.8  
128.7  
128.1  
128.0  
127.2  
126.0

77.5  
77.2  
76.8

25.7

21.2

1.5

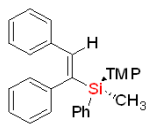

3ab

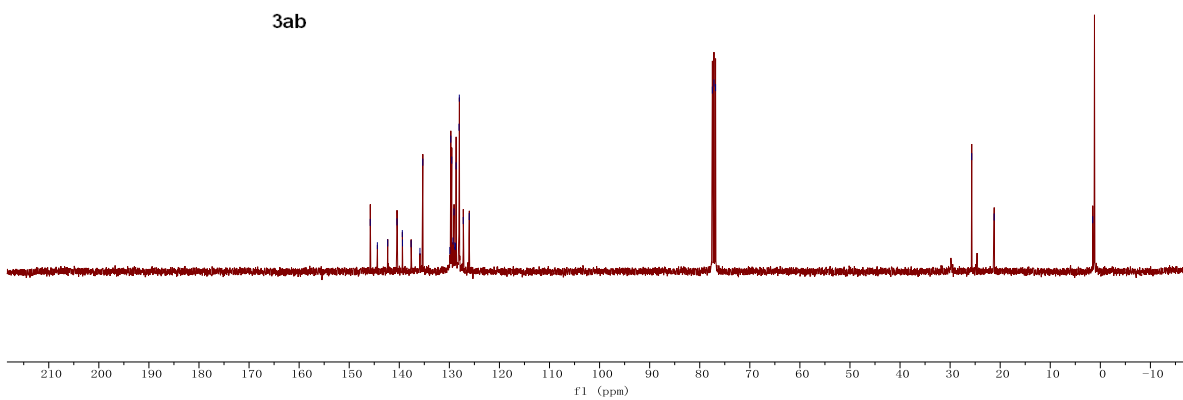

## 4 HPLC

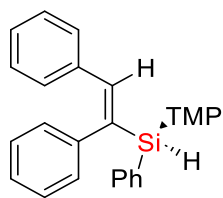

**3a**

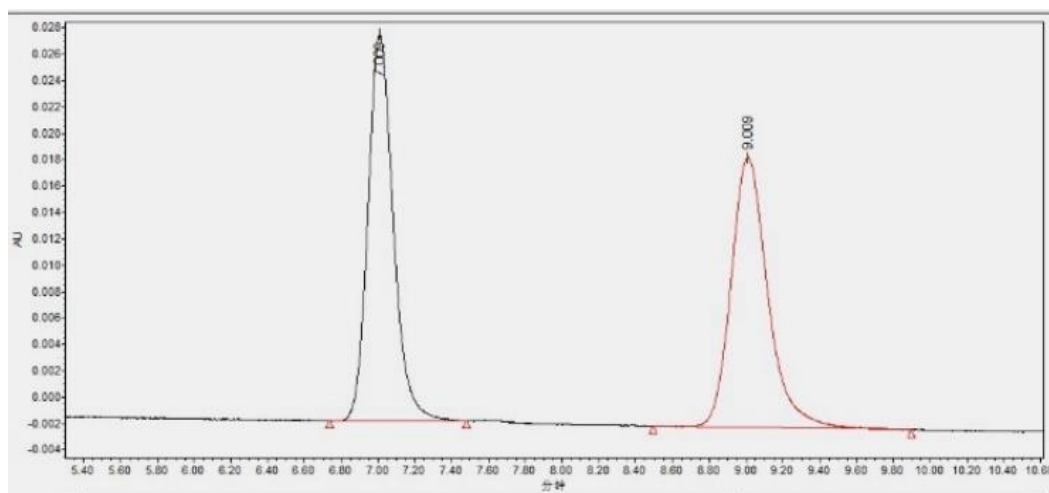

|          | Time/min | Area   | Height | Area% |
|----------|----------|--------|--------|-------|
| <b>1</b> | 7.009    | 280700 | 29297  | 49.62 |
| <b>2</b> | 9.009    | 284956 | 20478  | 50.38 |

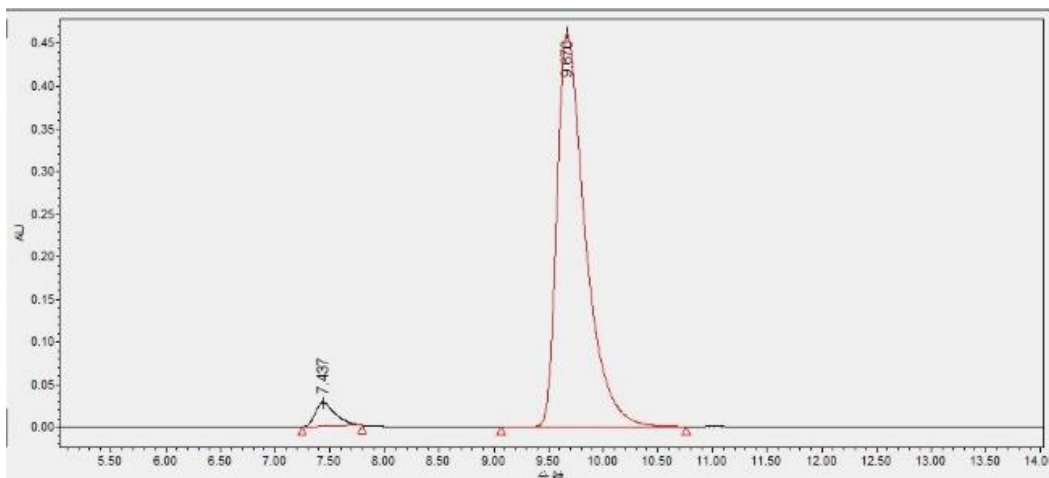

|          | Time/min | Area    | Height | Area% |
|----------|----------|---------|--------|-------|
| <b>1</b> | 7.437    | 357405  | 28088  | 4.13  |
| <b>2</b> | 9.670    | 8303133 | 461522 | 95.87 |

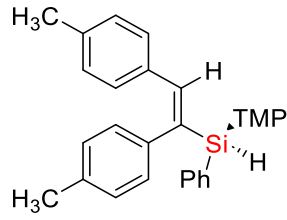

**3b**

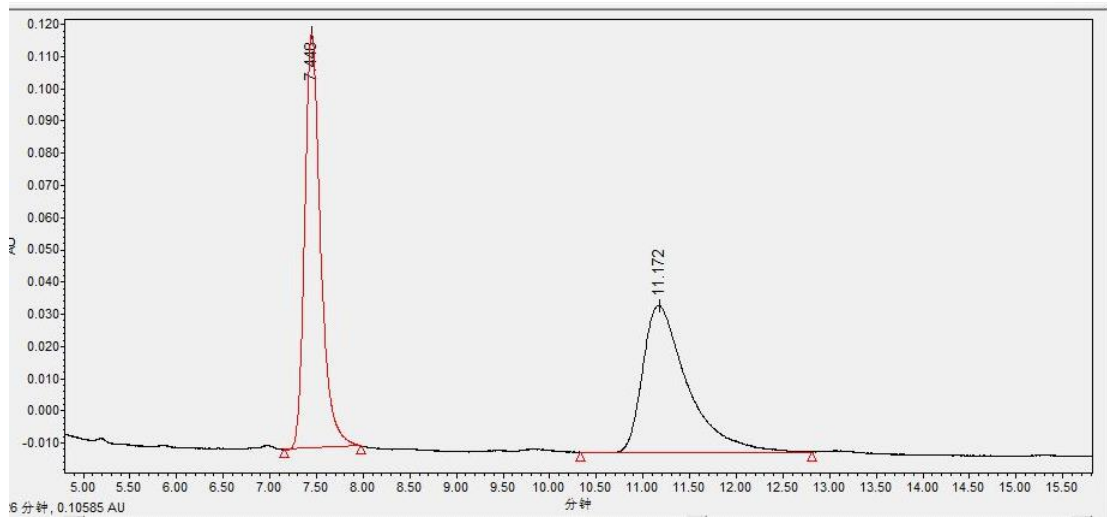

|   | Time/min | Area    | Height | Area% |
|---|----------|---------|--------|-------|
| 1 | 7.448    | 1528903 | 128814 | 50.30 |
| 2 | 11.172   | 1510493 | 45621  | 49.70 |

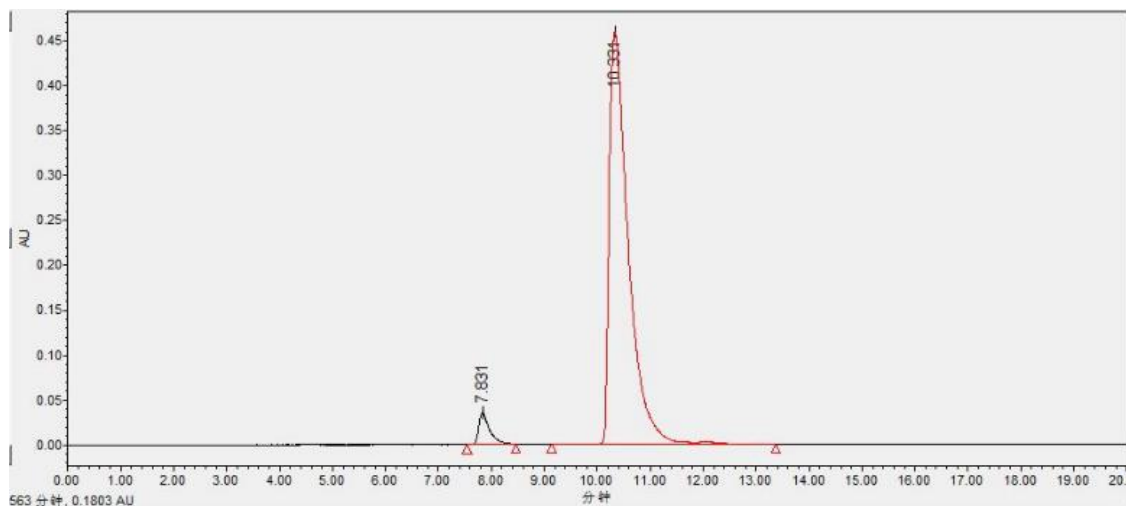

|   | Time/min | Area     | Height | Area% |
|---|----------|----------|--------|-------|
| 1 | 7.831    | 468851   | 35327  | 3.98  |
| 2 | 10.331   | 11316766 | 458559 | 96.02 |



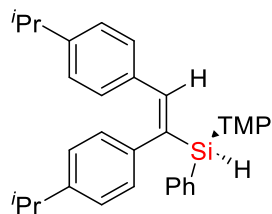

**3c**

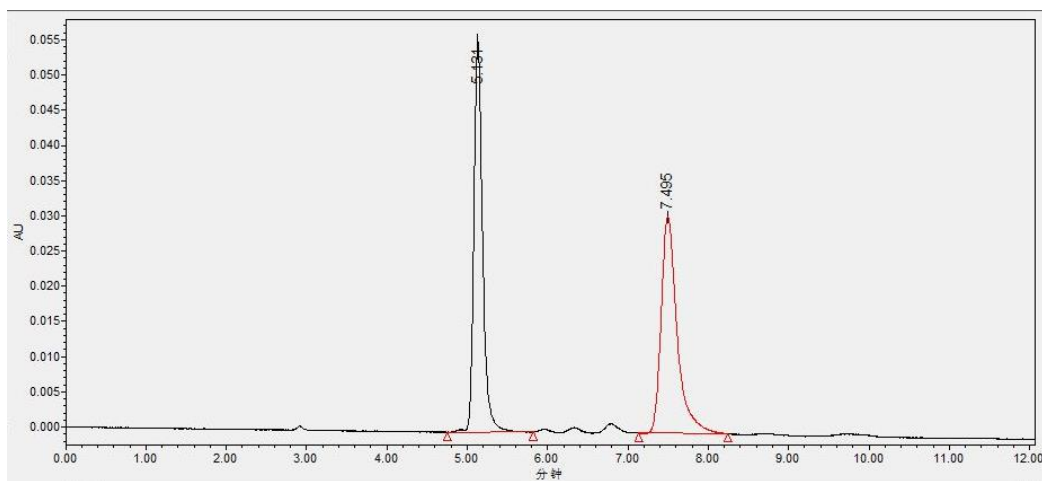

|          | Time/min | Area   | Height | Area% |
|----------|----------|--------|--------|-------|
| <b>1</b> | 5.131    | 420822 | 55709  | 49.72 |
| <b>2</b> | 7.495    | 425646 | 30756  | 50.28 |

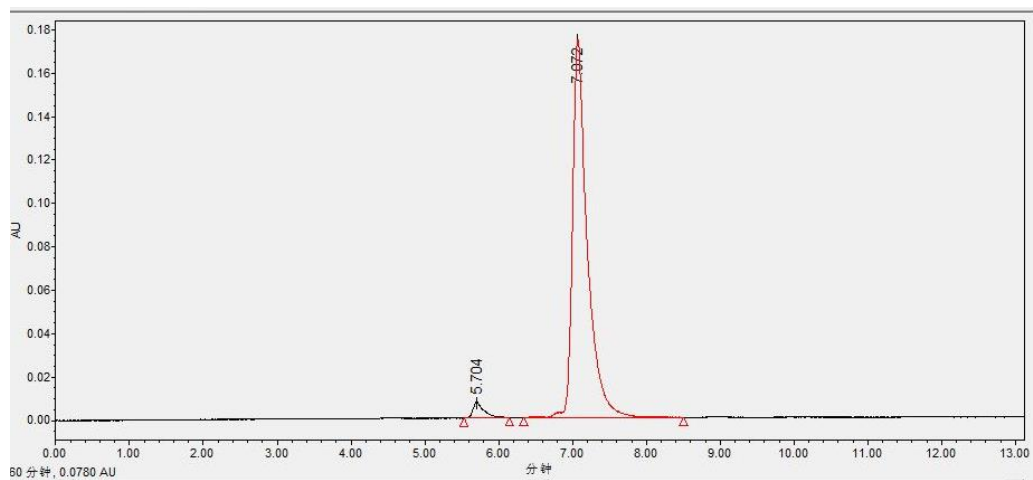

|          | Time/min | Area   | Height | Area% |
|----------|----------|--------|--------|-------|
| <b>1</b> | 5.704    | 76575  | 7241   | 3.06  |
| <b>2</b> | 7.072    | 242866 | 45621  | 96.94 |

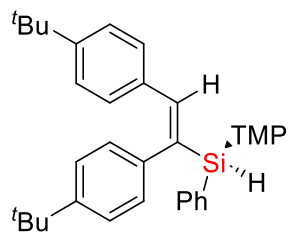

**3d**

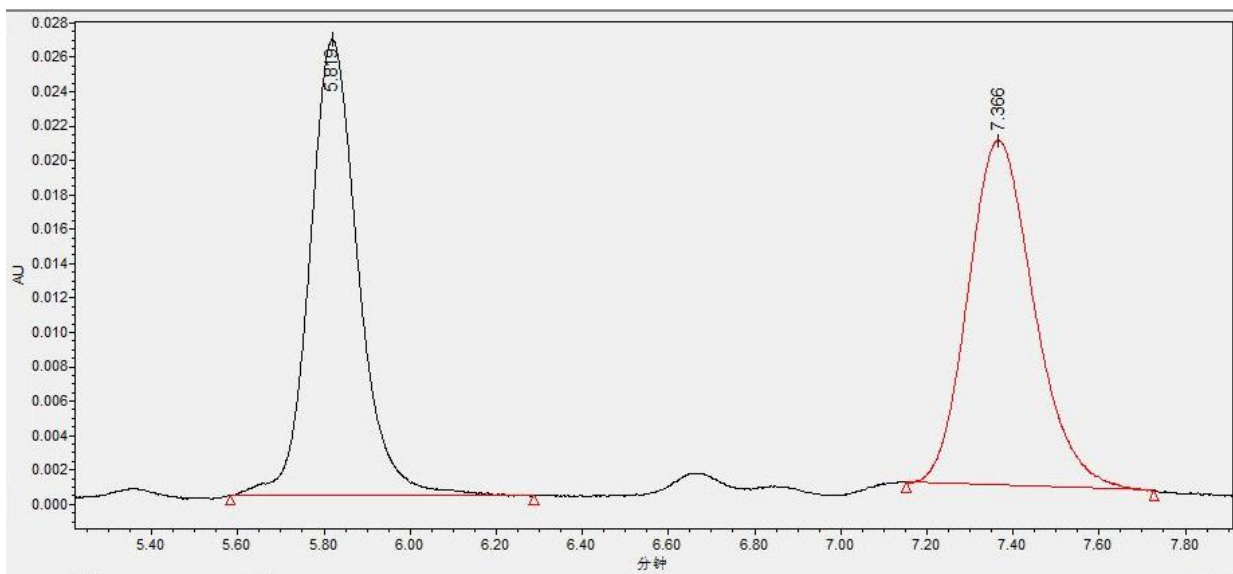

|          | Time/min | Area   | Height | Area% |
|----------|----------|--------|--------|-------|
| <b>1</b> | 5.819    | 207023 | 26508  | 49.23 |
| <b>2</b> | 7.366    | 213488 | 20074  | 50.77 |

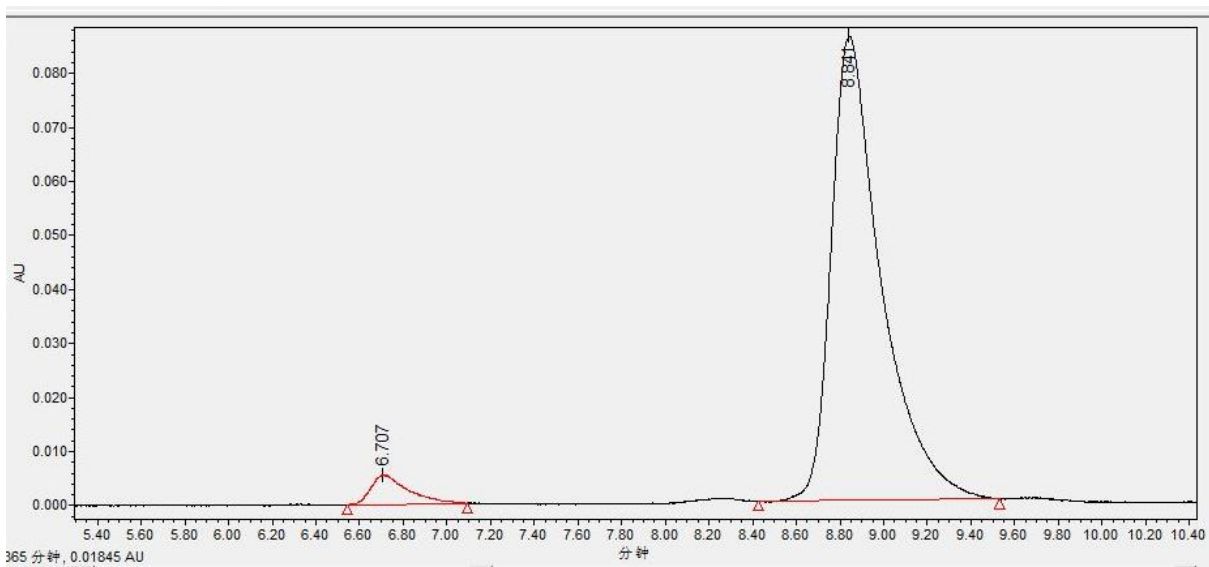

|          | Time/min | Area     | Height | Area% |
|----------|----------|----------|--------|-------|
| <b>1</b> | 6.707    | 63702    | 5494   | 4.45  |
| <b>2</b> | 8.841    | 13682299 | 86000  | 95.55 |

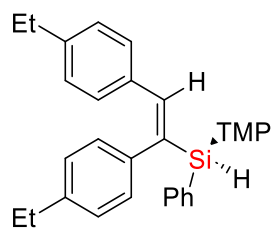

**3e**

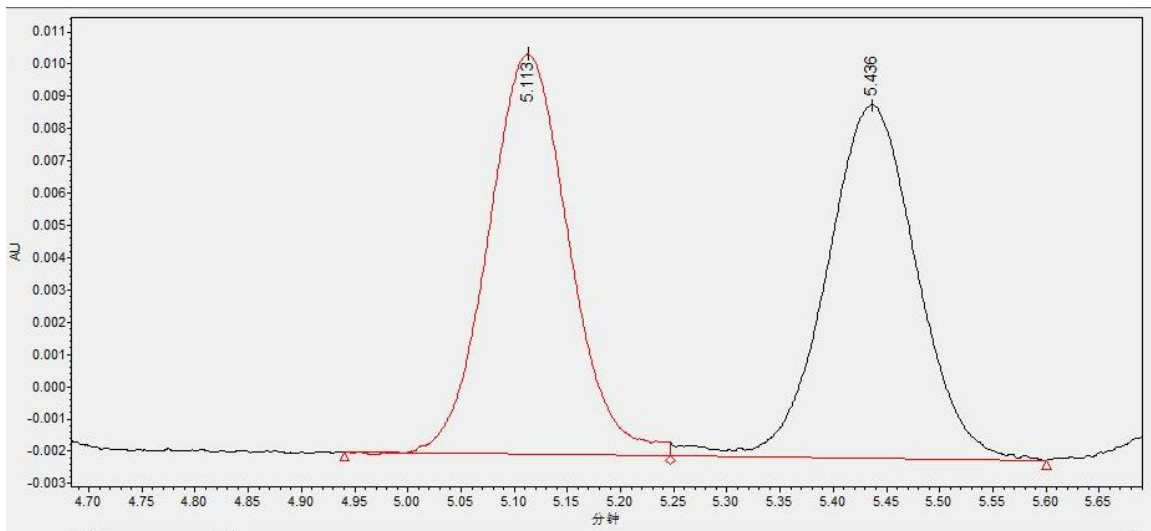

|          | Time/min | Area  | Height | Area% |
|----------|----------|-------|--------|-------|
| <b>1</b> | 5.113    | 65342 | 12411  | 50.24 |
| <b>2</b> | 5.436    | 64708 | 10959  | 49.76 |

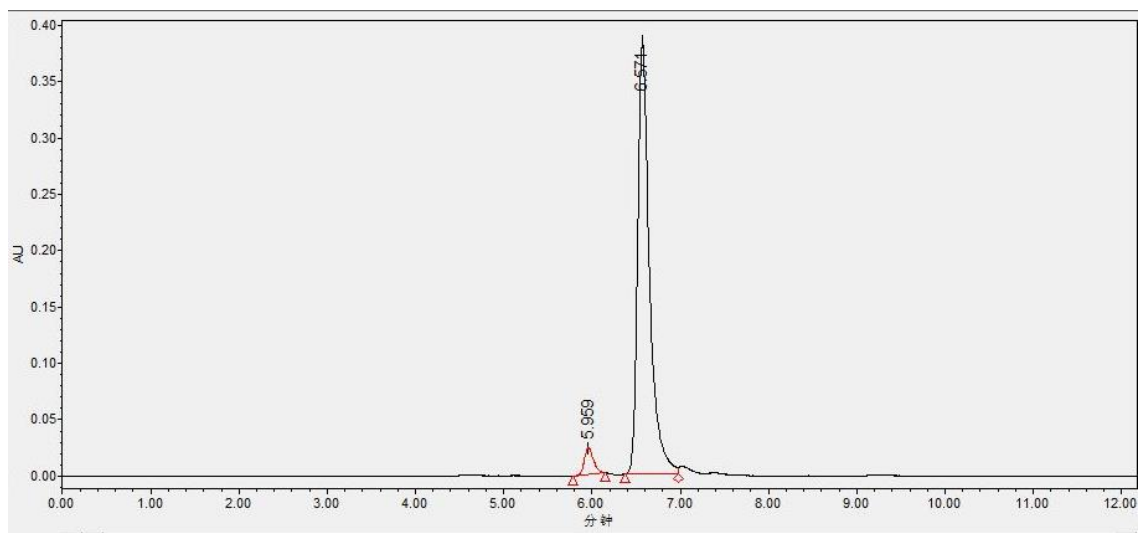

|          | Time/min | Area    | Height | Area% |
|----------|----------|---------|--------|-------|
| <b>1</b> | 5.959    | 170546  | 23756  | 4.55  |
| <b>2</b> | 6.571    | 3578645 | 382945 | 95.45 |

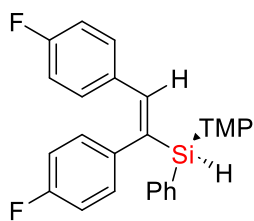

**3f**

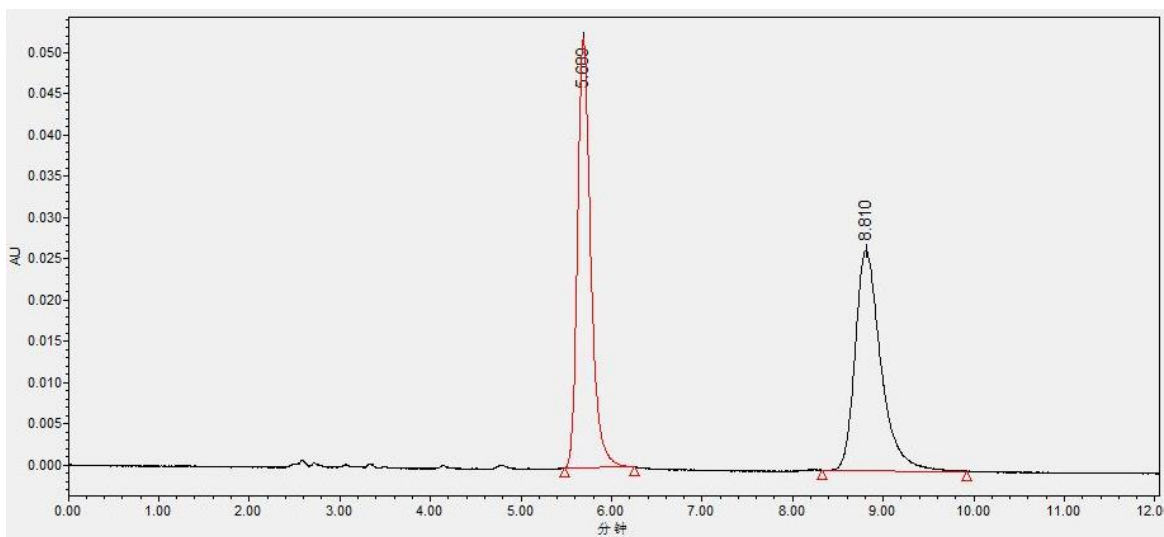

|          | Time/min | Area   | Height | Area% |
|----------|----------|--------|--------|-------|
| <b>1</b> | 5.689    | 527907 | 51909  | 50.15 |
| <b>2</b> | 8.810    | 524796 | 26639  | 49.85 |

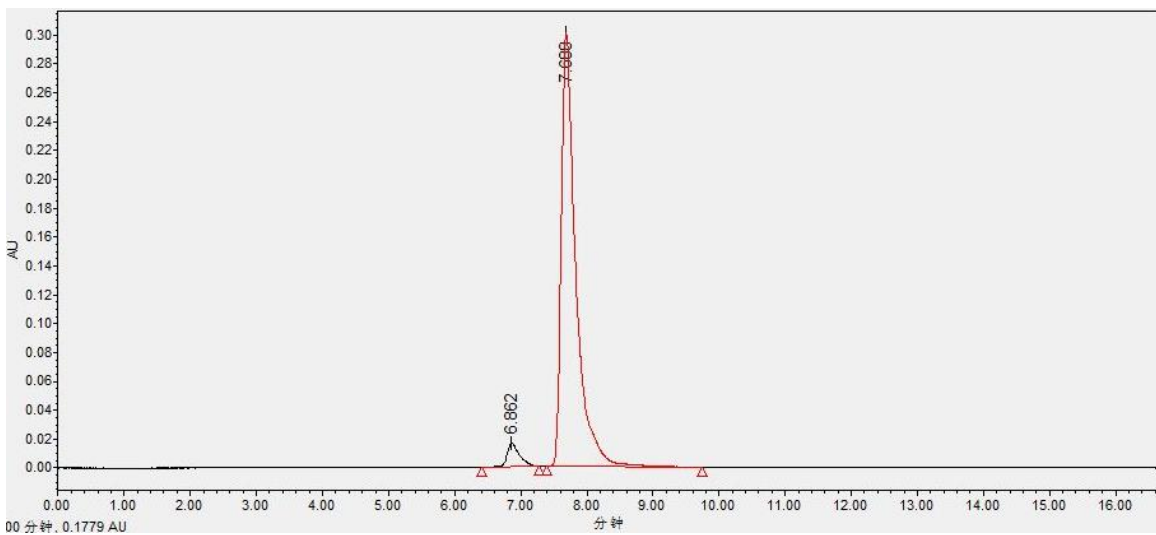

|          | Time/min | Area    | Height | Area% |
|----------|----------|---------|--------|-------|
| <b>1</b> | 6.862    | 215398  | 16584  | 4.49  |
| <b>2</b> | 7.688    | 4579305 | 300398 | 95.51 |

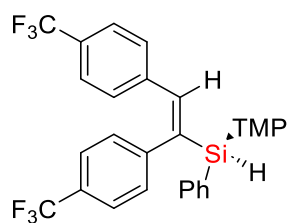

**3g**

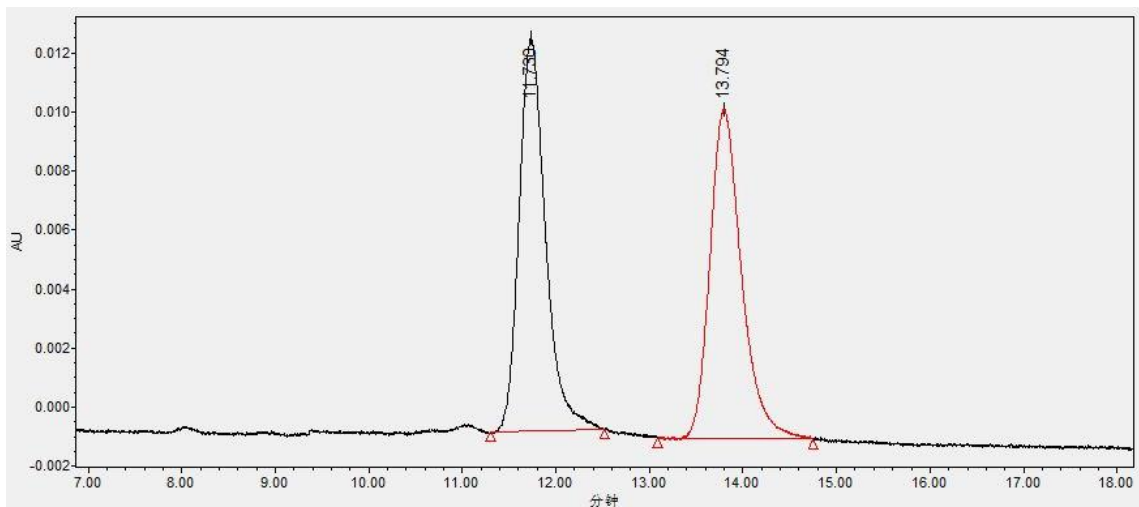

|          | Time/min | Area   | Height | Area% |
|----------|----------|--------|--------|-------|
| <b>1</b> | 11.730   | 262328 | 13313  | 49.98 |
| <b>2</b> | 13.794   | 262512 | 11167  | 50.02 |

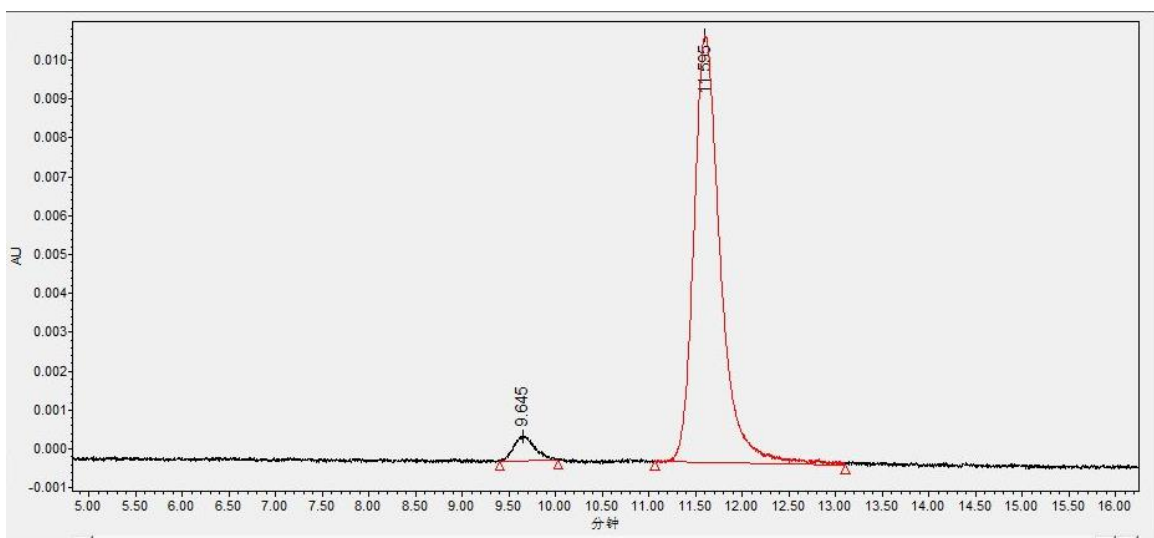

|          | Time/min | Area   | Height | Area% |
|----------|----------|--------|--------|-------|
| <b>1</b> | 9.645    | 10034  | 649    | 4.41  |
| <b>2</b> | 11.595   | 217507 | 10976  | 95.59 |

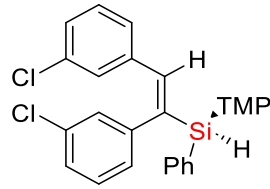

**3h**

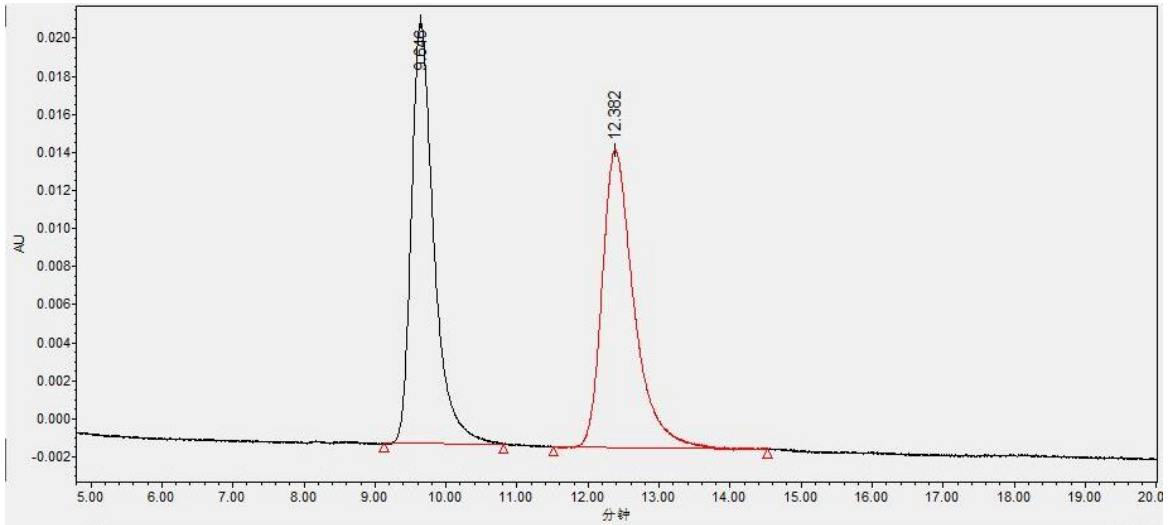

|          | Time/min | Area   | Height | Area% |
|----------|----------|--------|--------|-------|
| <b>1</b> | 9.464    | 486739 | 22160  | 50.01 |
| <b>2</b> | 12.382   | 486580 | 15655  | 49.99 |

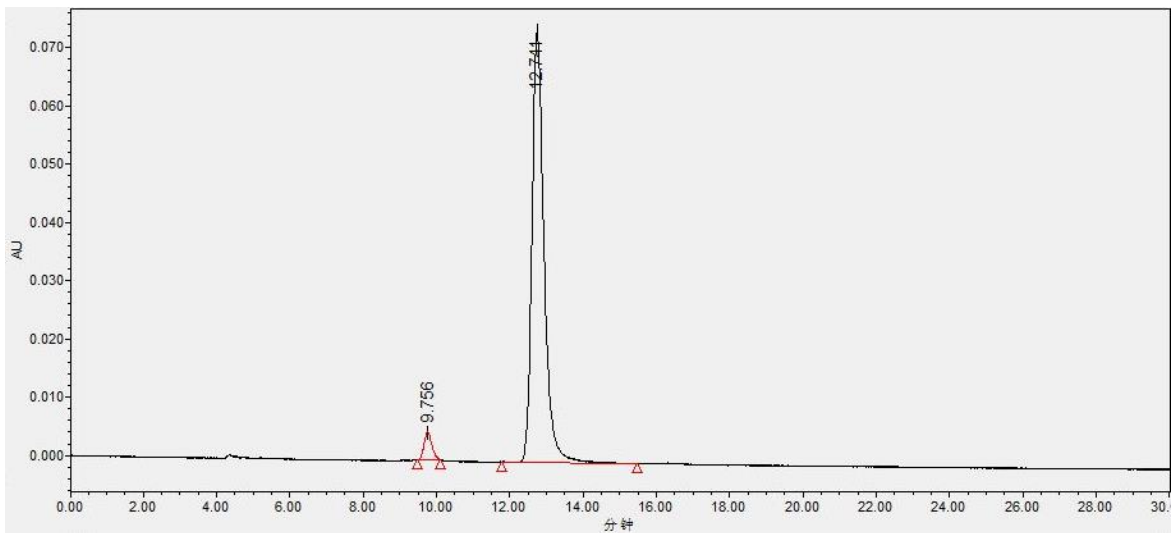

|          | Time/min | Area    | Height | Area% |
|----------|----------|---------|--------|-------|
| <b>1</b> | 9.756    | 70144   | 4801   | 3.96  |
| <b>2</b> | 12.741   | 1702092 | 74040  | 96.04 |

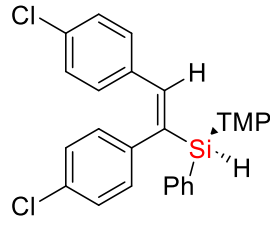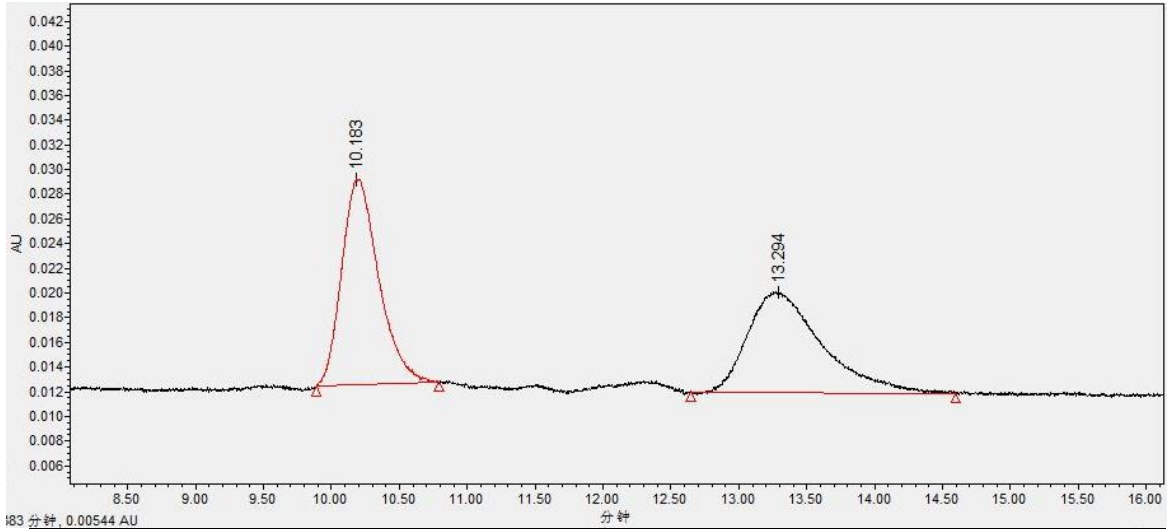

|          | Time/min | Area   | Height | Area% |
|----------|----------|--------|--------|-------|
| <b>1</b> | 10.183   | 317200 | 16701  | 50.95 |
| <b>2</b> | 13.294   | 305313 | 8132   | 49.05 |

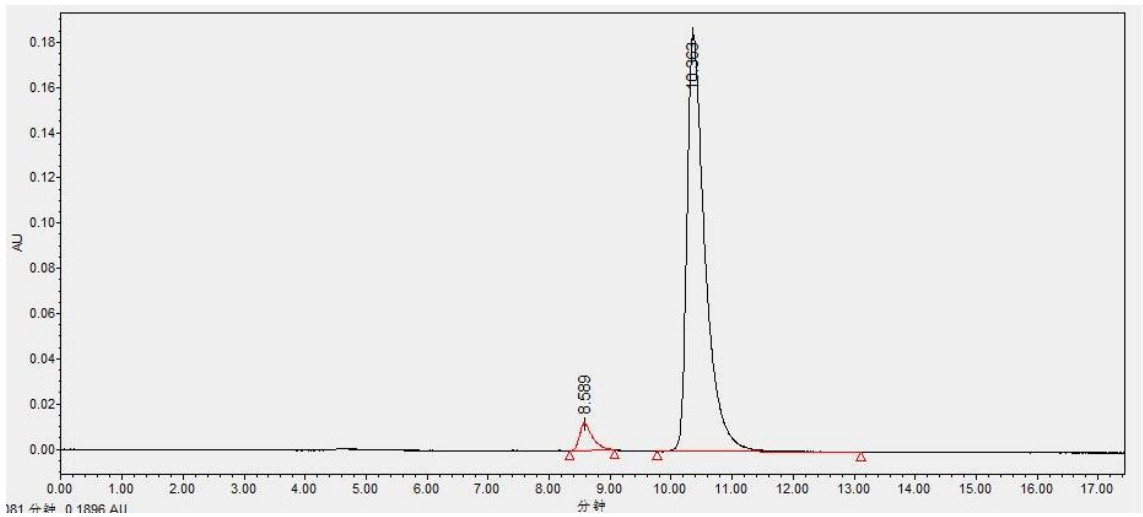

|          | Time/min | Area    | Height | Area% |
|----------|----------|---------|--------|-------|
| <b>1</b> | 8.589    | 180187  | 12080  | 4.50  |
| <b>2</b> | 10.363   | 3824919 | 184641 | 95.50 |

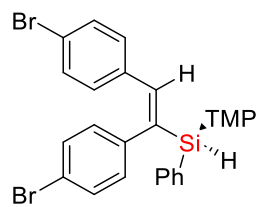

**3j**

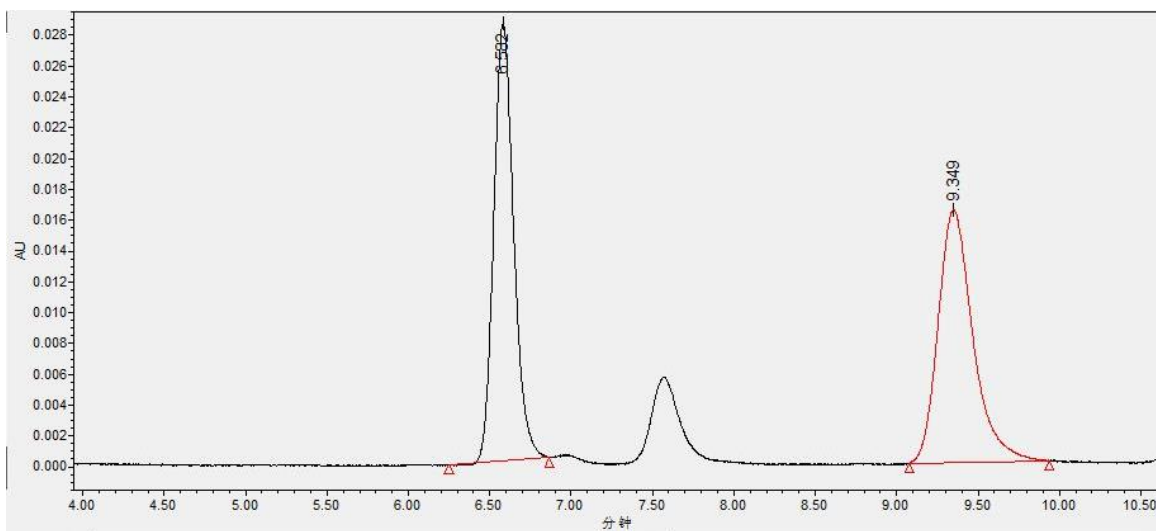

|          | Time/min | Area   | Height | Area% |
|----------|----------|--------|--------|-------|
| <b>1</b> | 6.582    | 242142 | 28385  | 49.90 |
| <b>2</b> | 9.349    | 243130 | 16403  | 50.10 |

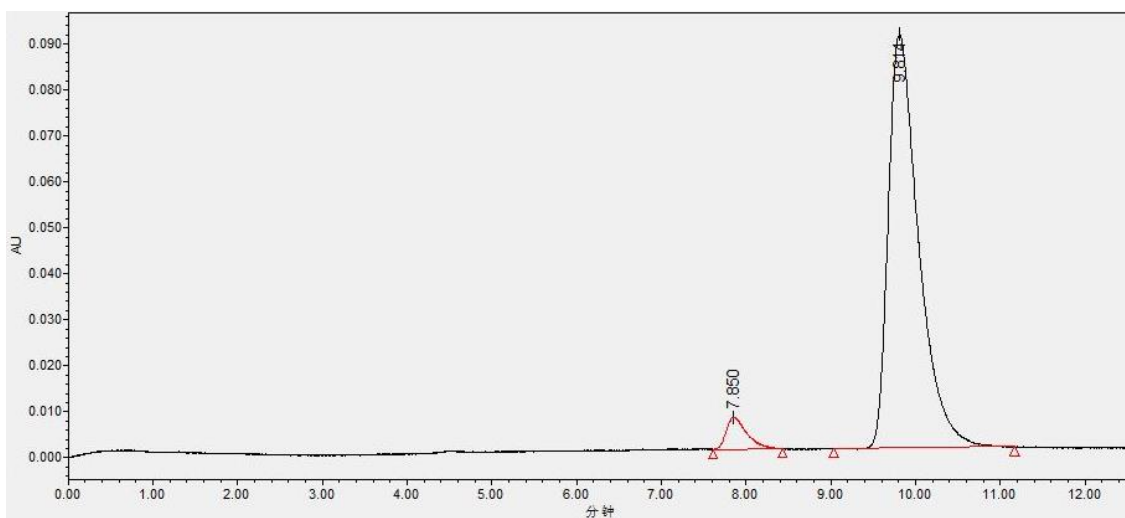

|          | Time/min | Area    | Height | Area% |
|----------|----------|---------|--------|-------|
| <b>1</b> | 7.850    | 117167  | 6952   | 4.97  |
| <b>2</b> | 9.814    | 2240643 | 89998  | 95.03 |



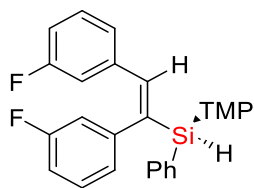

**3k**

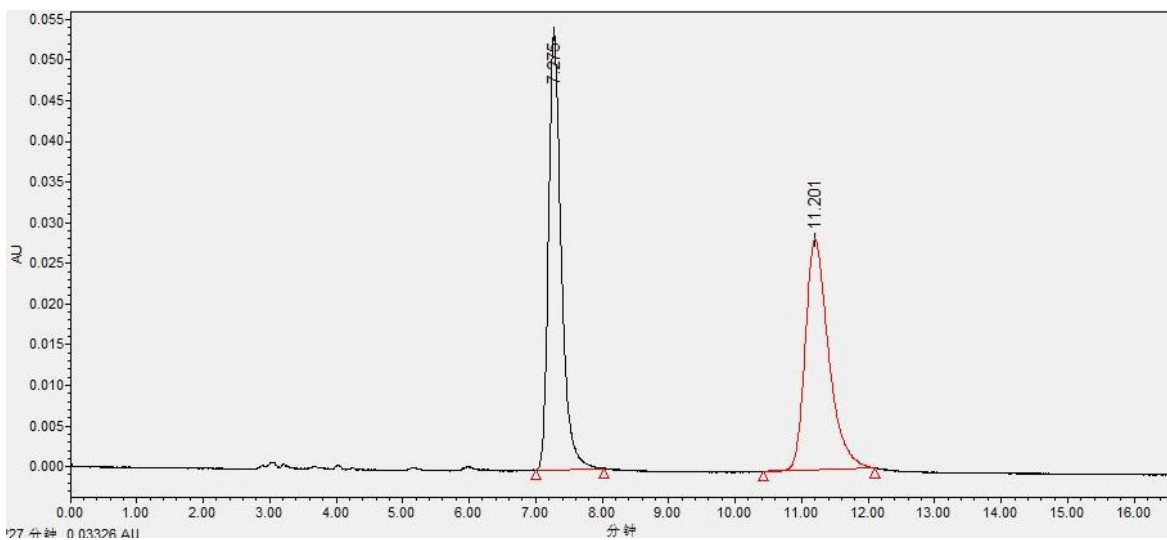

|          | Time/min | Area   | Height | Area% |
|----------|----------|--------|--------|-------|
| <b>1</b> | 7.275    | 718808 | 53542  | 50.89 |
| <b>2</b> | 11.201   | 693734 | 28403  | 49.11 |

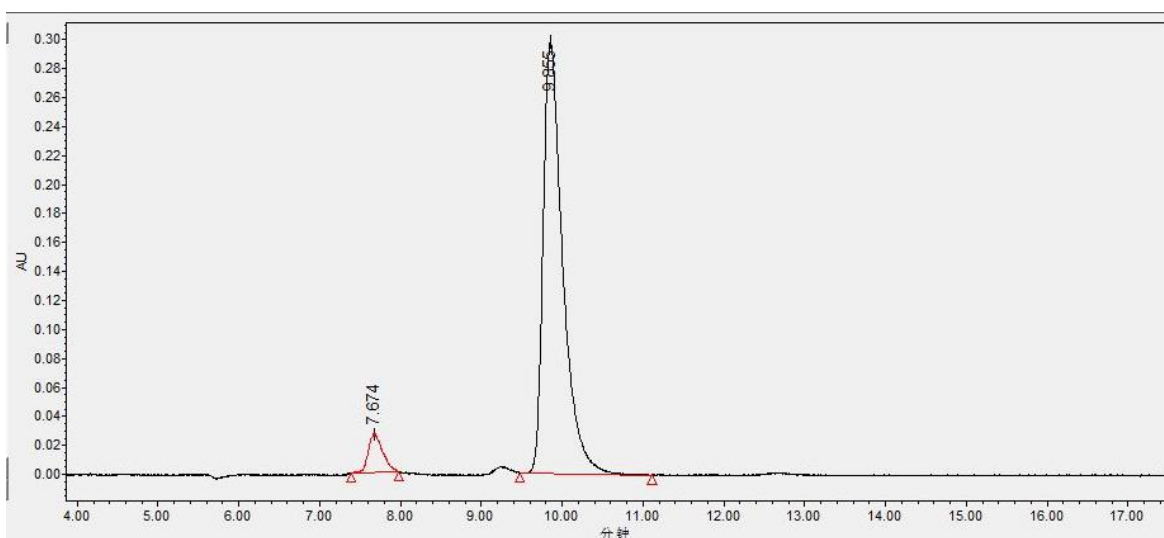

|          | Time/min | Area    | Height | Area% |
|----------|----------|---------|--------|-------|
| <b>1</b> | 7.674    | 324505  | 26520  | 6.09  |
| <b>2</b> | 9.855    | 5008261 | 297423 | 93.91 |

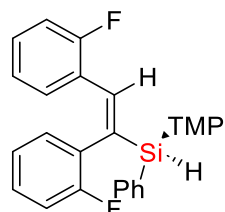

**3I**

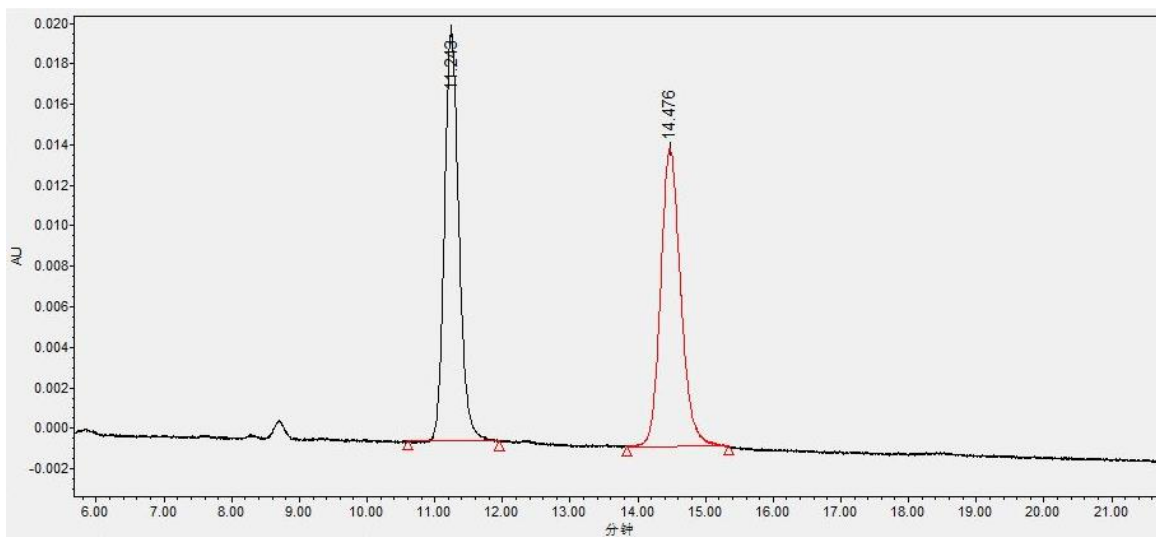

|          | Time/min | Area   | Height | Area% |
|----------|----------|--------|--------|-------|
| <b>1</b> | 11.243   | 301741 | 20238  | 49.98 |
| <b>2</b> | 14.476   | 301978 | 14712  | 50.02 |

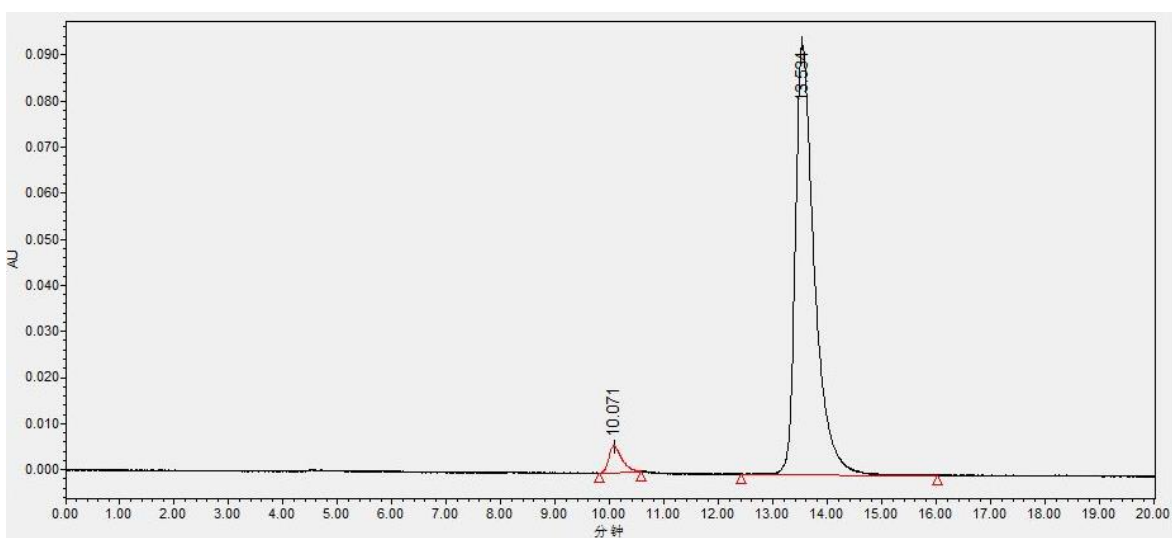

|          | Time/min | Area    | Height | Area% |
|----------|----------|---------|--------|-------|
| <b>1</b> | 10.071   | 94473   | 5765   | 3.99  |
| <b>2</b> | 13.534   | 2274083 | 93517  | 96.01 |

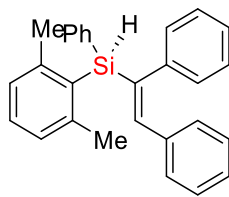

**3m**

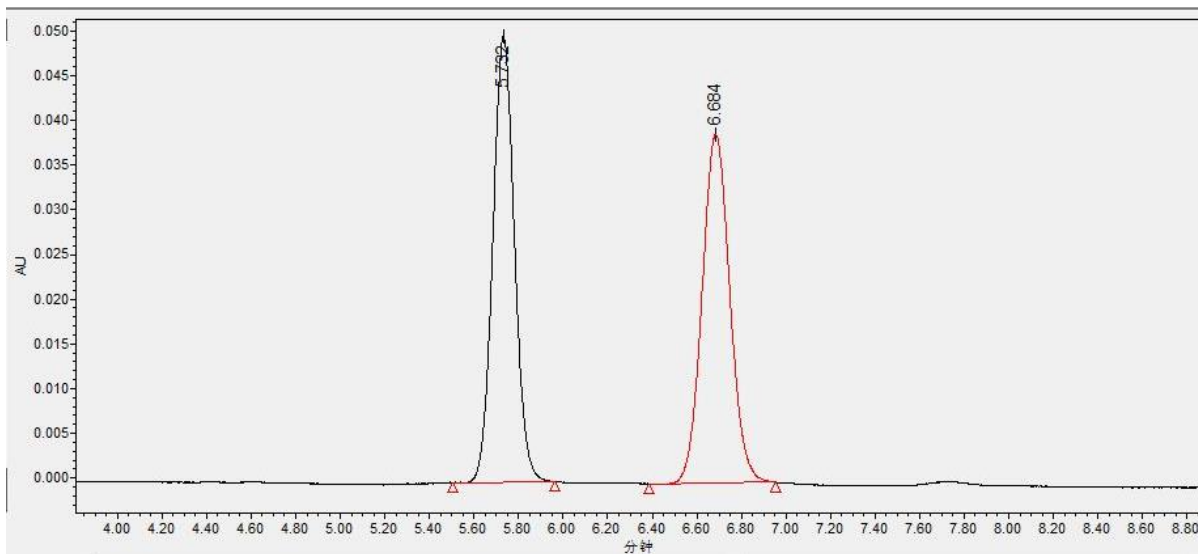

|          | Time/min | Area   | Height | Area% |
|----------|----------|--------|--------|-------|
| <b>1</b> | 5.732    | 335533 | 49775  | 49.90 |
| <b>2</b> | 6.684    | 336879 | 38983  | 50.10 |

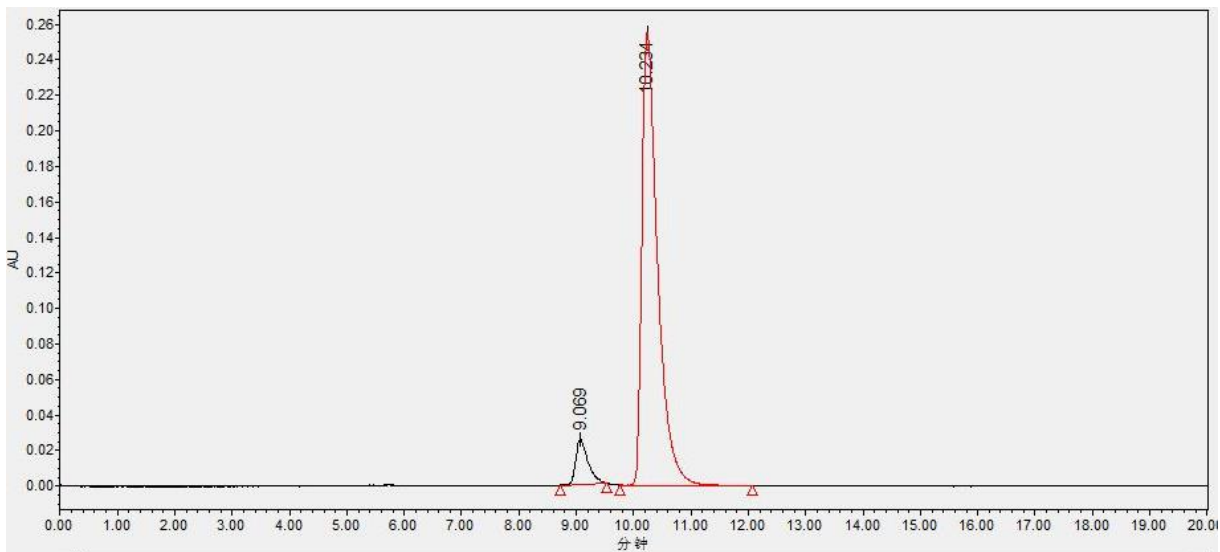

|          | Time/min | Area    | Height | Area% |
|----------|----------|---------|--------|-------|
| <b>1</b> | 9.069    | 376365  | 25532  | 7.19  |
| <b>2</b> | 10.234   | 4859147 | 254651 | 92.81 |

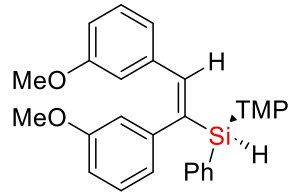

**3n**

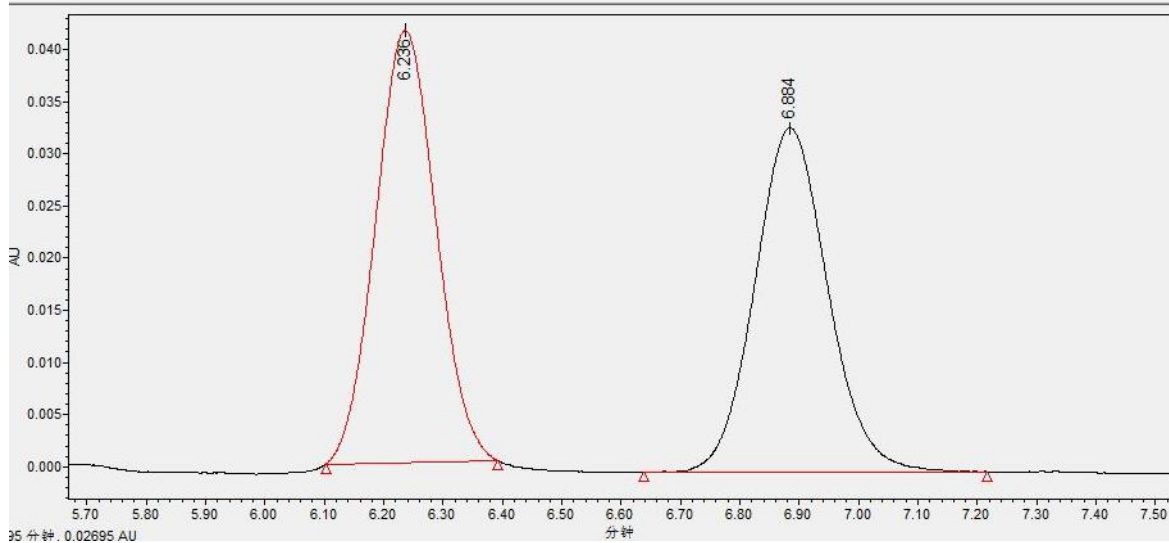

|          | Time/min | Area   | Height | Area% |
|----------|----------|--------|--------|-------|
| <b>1</b> | 6.236    | 292916 | 41404  | 50.91 |
| <b>2</b> | 6.884    | 282412 | 33006  | 49.09 |

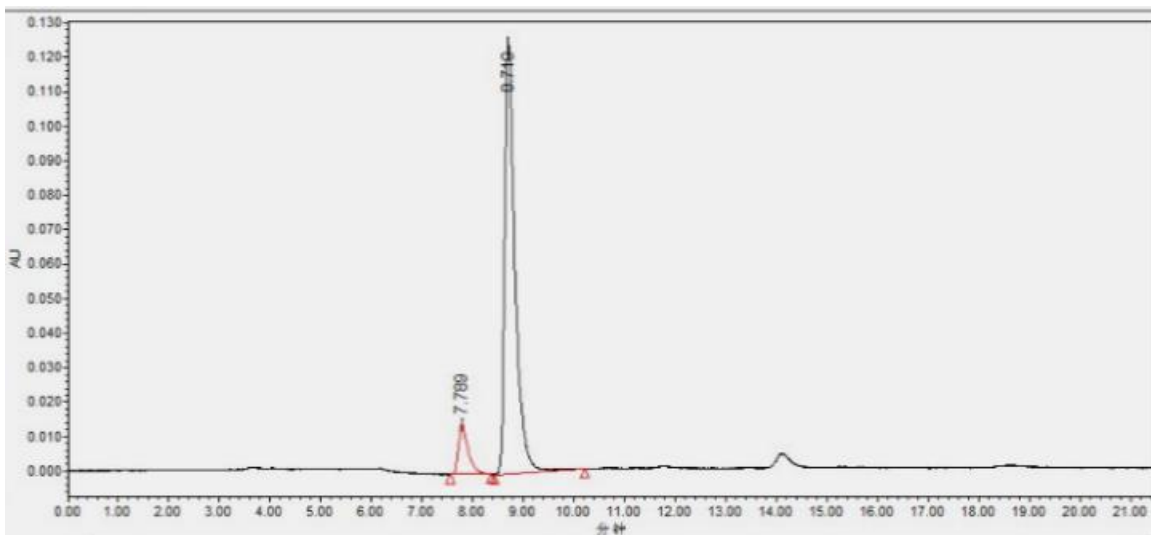

|          | Time/min | Area   | Height | Area% |
|----------|----------|--------|--------|-------|
| <b>1</b> | 7.789    | 191605 | 14665  | 9.80  |
| <b>2</b> | 8.710    | 176316 | 124880 | 90.20 |

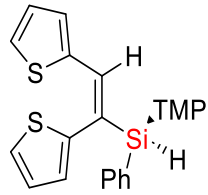

**3o**

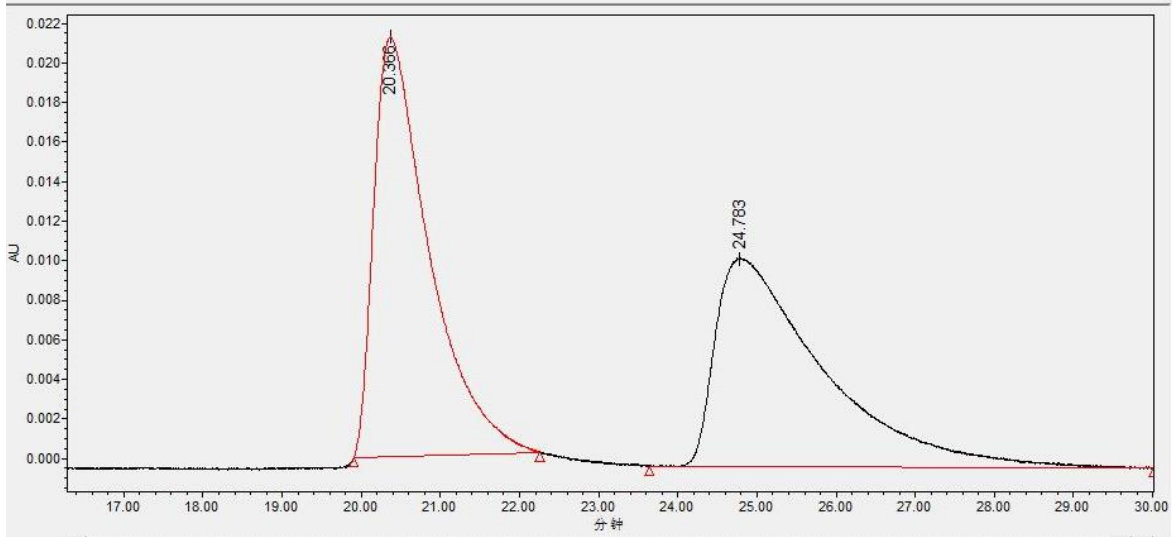

|   | Time/min | Area    | Height | Area% |
|---|----------|---------|--------|-------|
| 1 | 20.366   | 1028800 | 21238  | 50.86 |
| 2 | 24.783   | 994195  | 10534  | 49.14 |

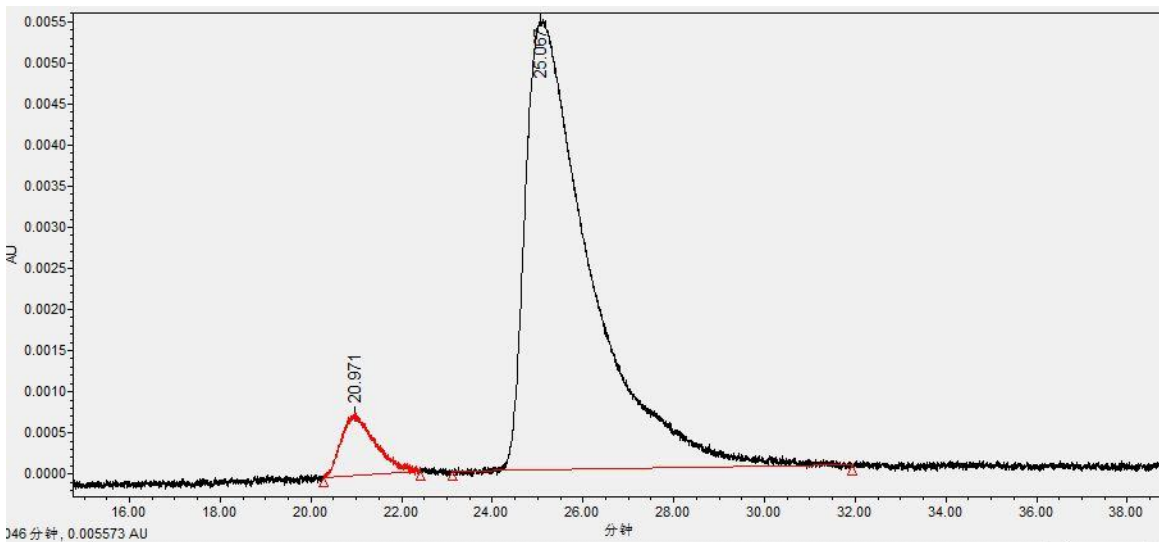

|   | Time/min | Area   | Height | Area% |
|---|----------|--------|--------|-------|
| 1 | 20.971   | 38047  | 759    | 6.55  |
| 2 | 25.067   | 543166 | 5478   | 93.45 |

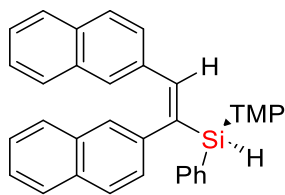

**3p**

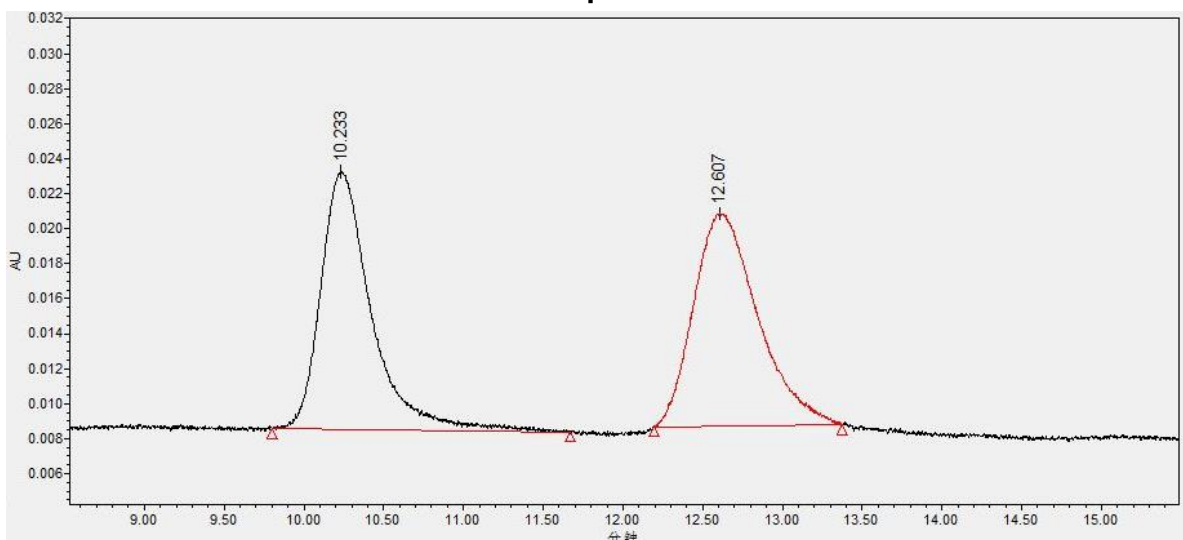

|          | Time/min | Area   | Height | Area% |
|----------|----------|--------|--------|-------|
| <b>1</b> | 10.233   | 328446 | 14809  | 49.04 |
| <b>2</b> | 12.607   | 341350 | 12208  | 50.96 |

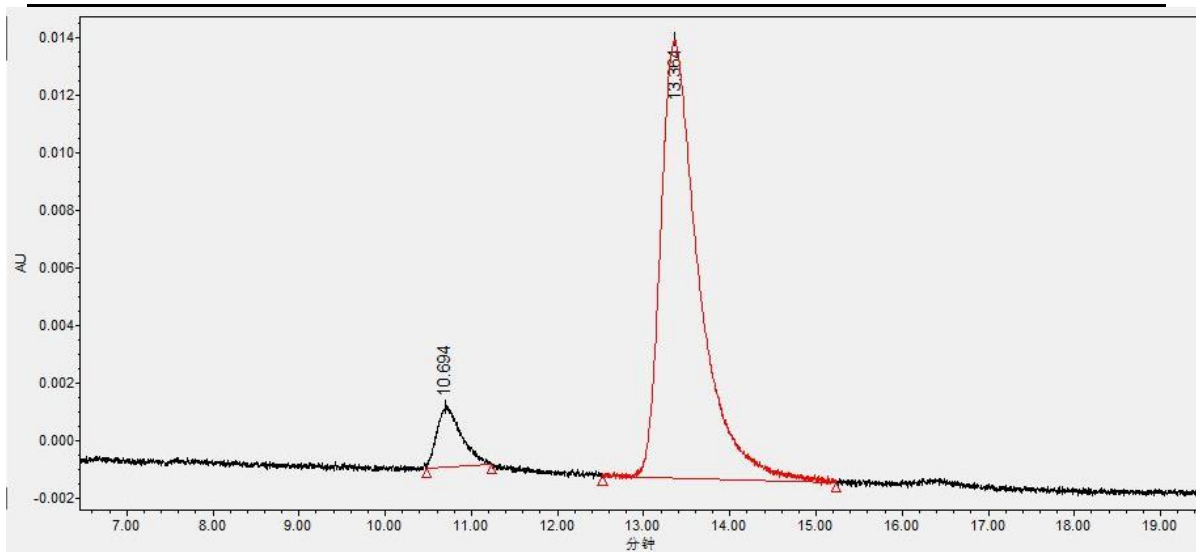

|          | Time/min | Area   | Height | Area% |
|----------|----------|--------|--------|-------|
| <b>1</b> | 10.694   | 40506  | 2114   | 7.93  |
| <b>2</b> | 13.364   | 470327 | 15202  | 92.07 |

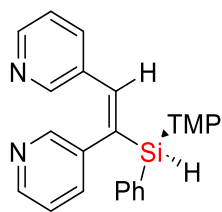

**3q**

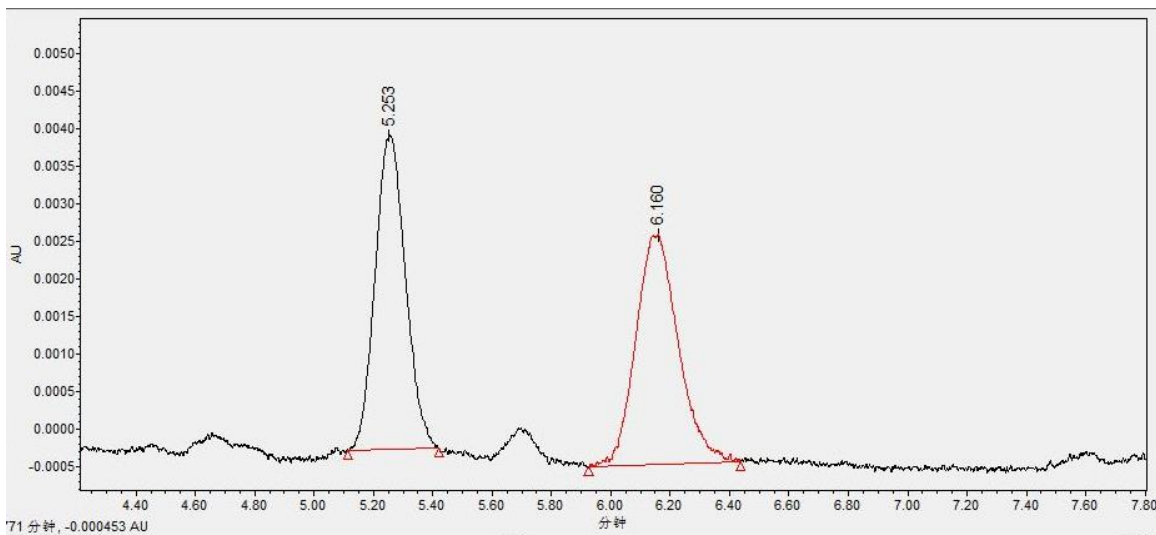

|   | Time/min | Area  | Height | Area% |
|---|----------|-------|--------|-------|
| 1 | 5.253    | 29786 | 4197   | 49.31 |
| 2 | 6.160    | 30619 | 3073   | 50.69 |

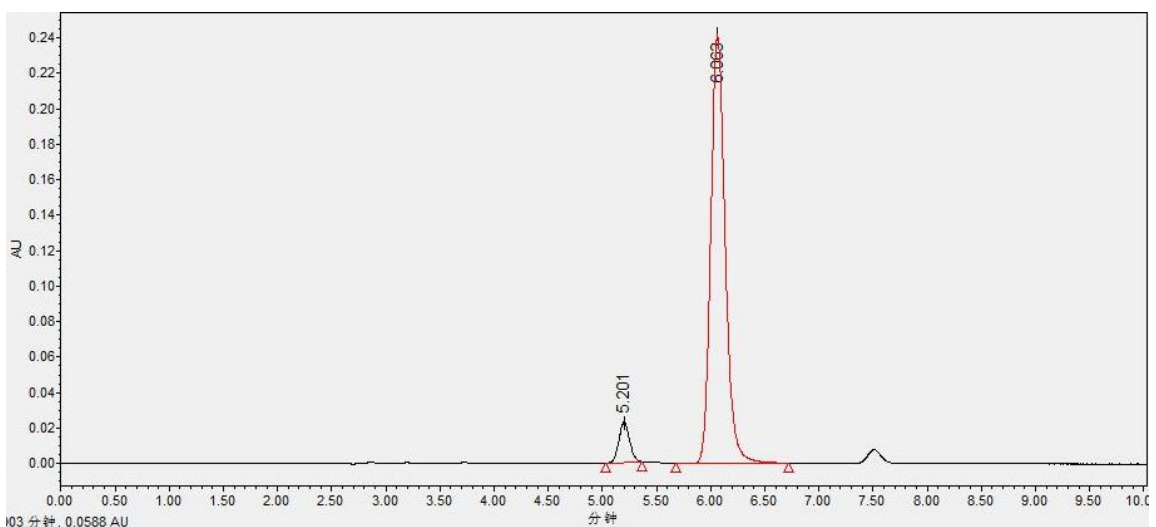

|   | Time/min | Area    | Height | Area% |
|---|----------|---------|--------|-------|
| 1 | 5.201    | 155300  | 22651  | 6.50  |
| 2 | 6.063    | 2234795 | 241941 | 93.50 |

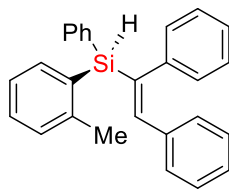

**3r**

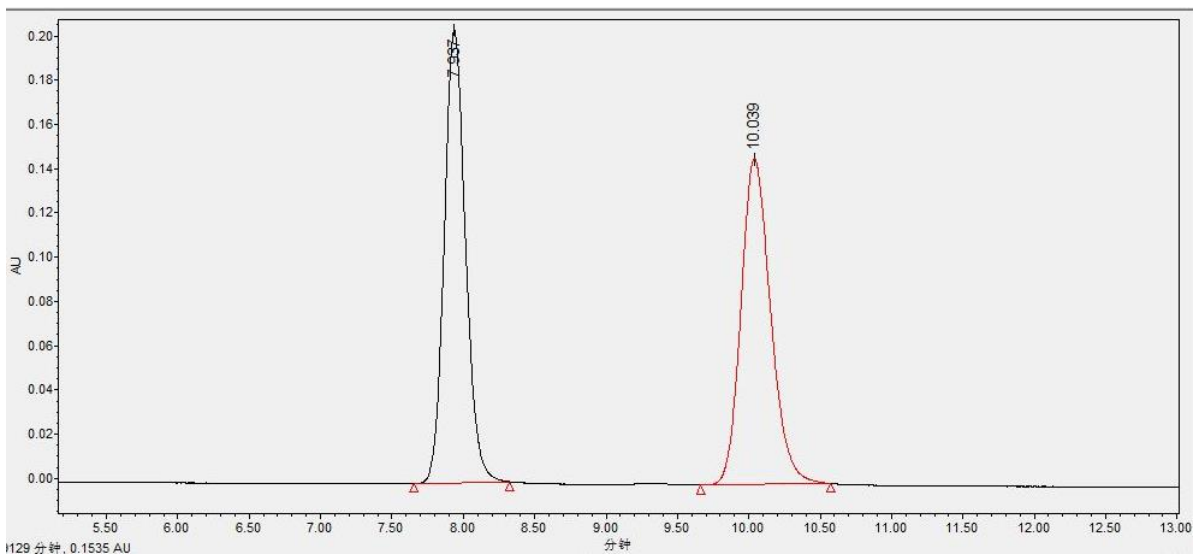

|          | Time/min | Area    | Height | Area% |
|----------|----------|---------|--------|-------|
| <b>1</b> | 7.937    | 2121153 | 204569 | 49.95 |
| <b>2</b> | 10.039   | 2125697 | 147146 | 50.05 |

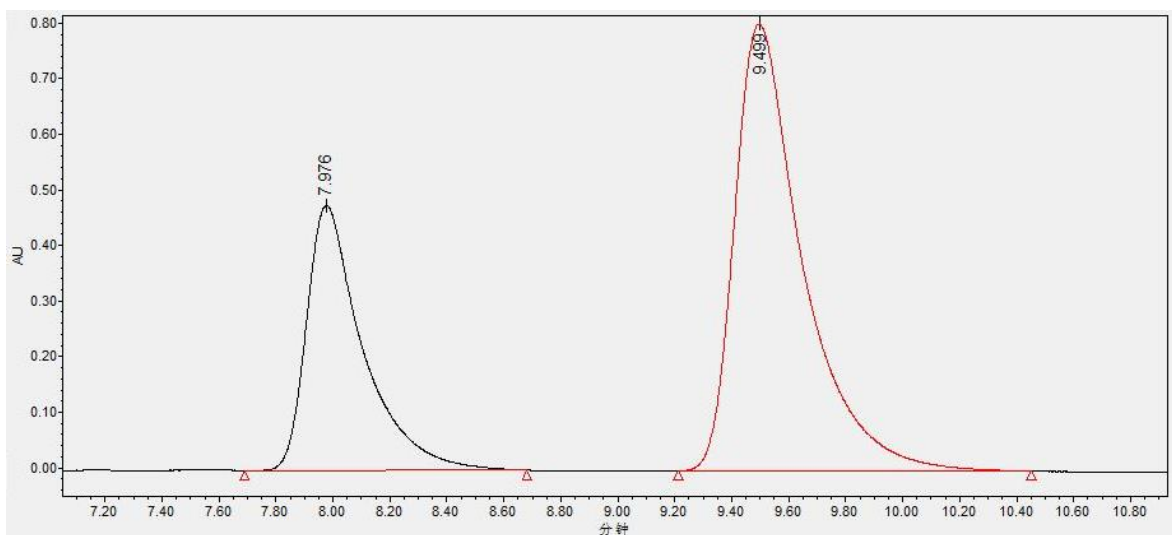

|          | Time/min | Area     | Height | Area% |
|----------|----------|----------|--------|-------|
| <b>1</b> | 7.976    | 6541942  | 476958 | 32.92 |
| <b>2</b> | 9.499    | 13332400 | 804749 | 67.08 |



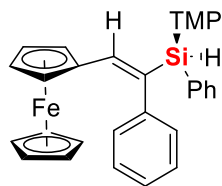

9a

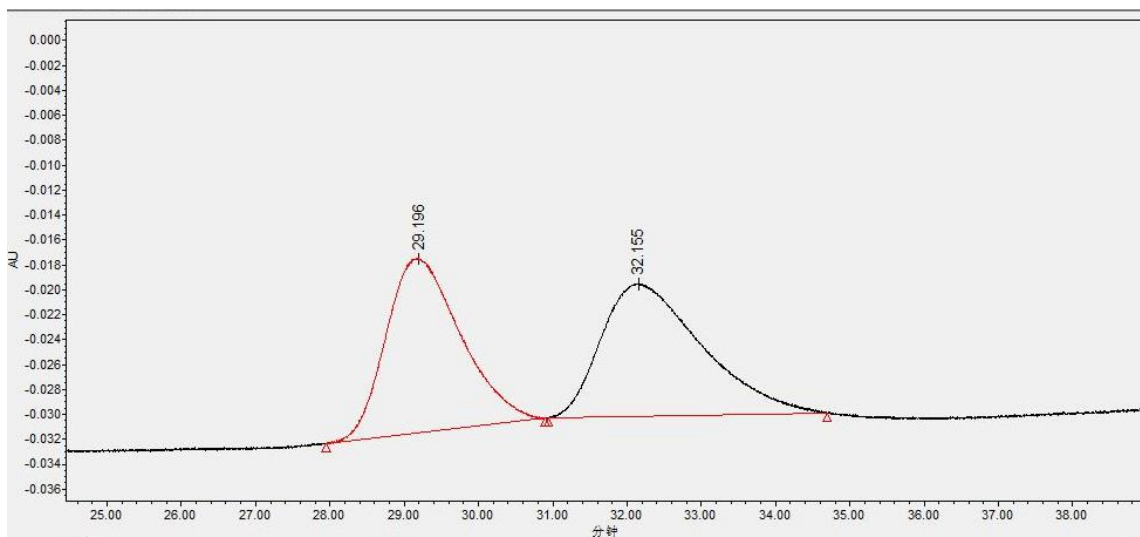

|   | Time/min | Area   | Height | Area% |
|---|----------|--------|--------|-------|
| 1 | 29.196   | 971007 | 14004  | 49.28 |
| 2 | 32.155   | 999438 | 10662  | 50.72 |

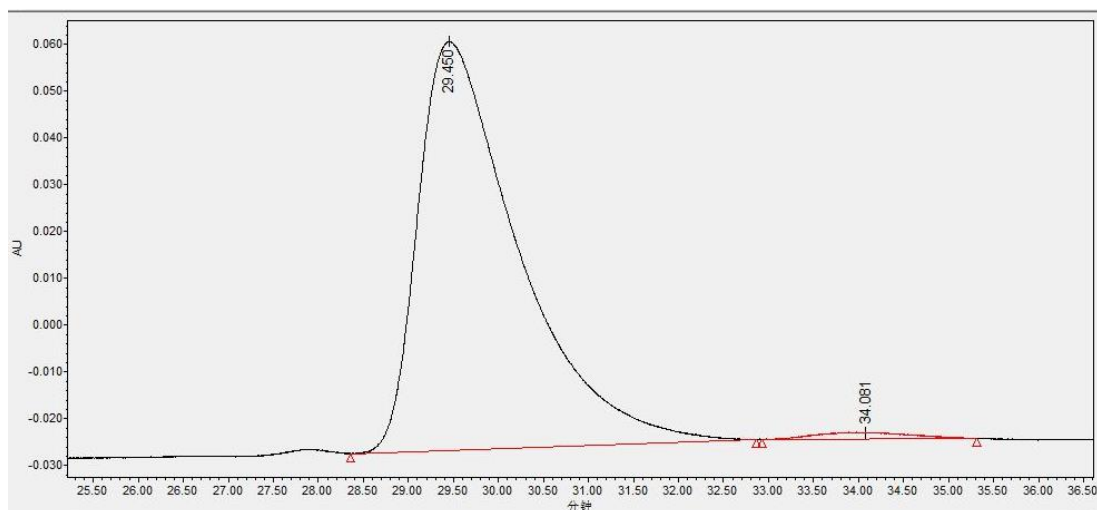

|   | Time/min | Area    | Height | Area% |
|---|----------|---------|--------|-------|
| 1 | 29.450   | 6750339 | 87265  | 1.52  |
| 2 | 34.081   | 104067  | 4170   | 98.48 |

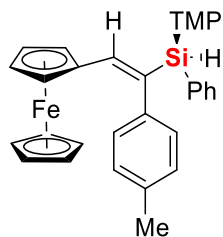

**9b**

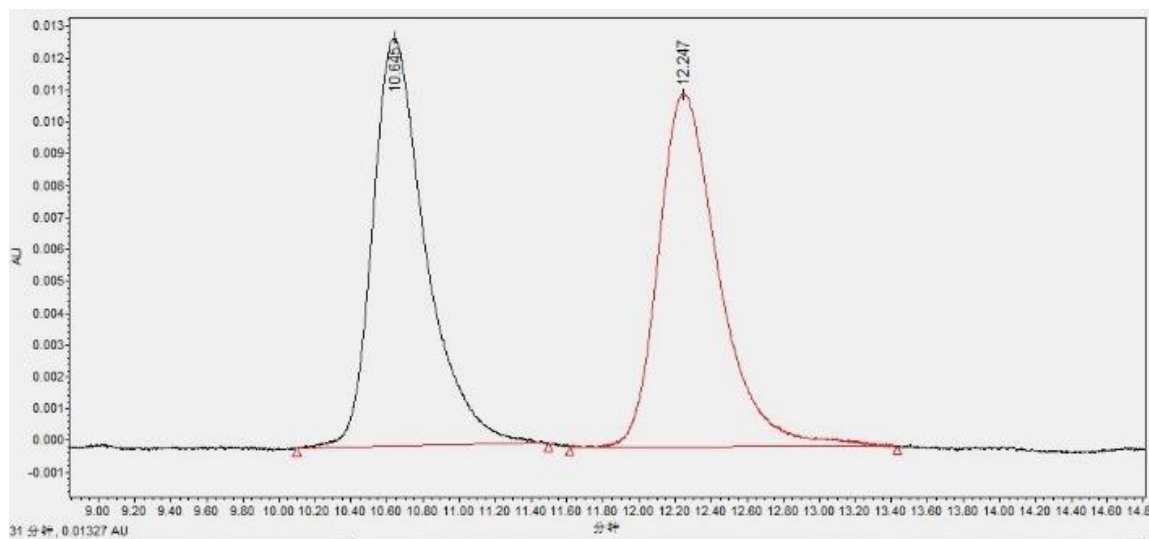

|          | Time/min | Area   | Height | Area% |
|----------|----------|--------|--------|-------|
| <b>1</b> | 10.645   | 262454 | 12803  | 50.44 |
| <b>2</b> | 12.247   | 257900 | 11073  | 49.56 |

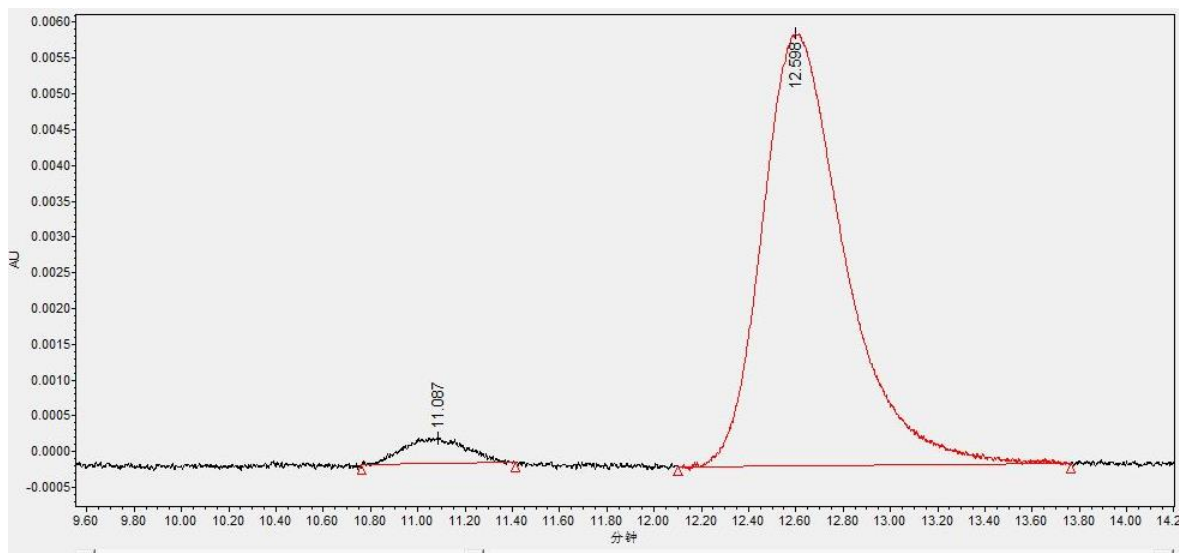

|          | Time/min | Area   | Height | Area% |
|----------|----------|--------|--------|-------|
| <b>1</b> | 11.035   | 45845  | 2399   | 4.51  |
| <b>2</b> | 12.600   | 971111 | 40187  | 95.49 |

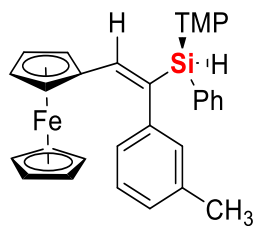

**9c**

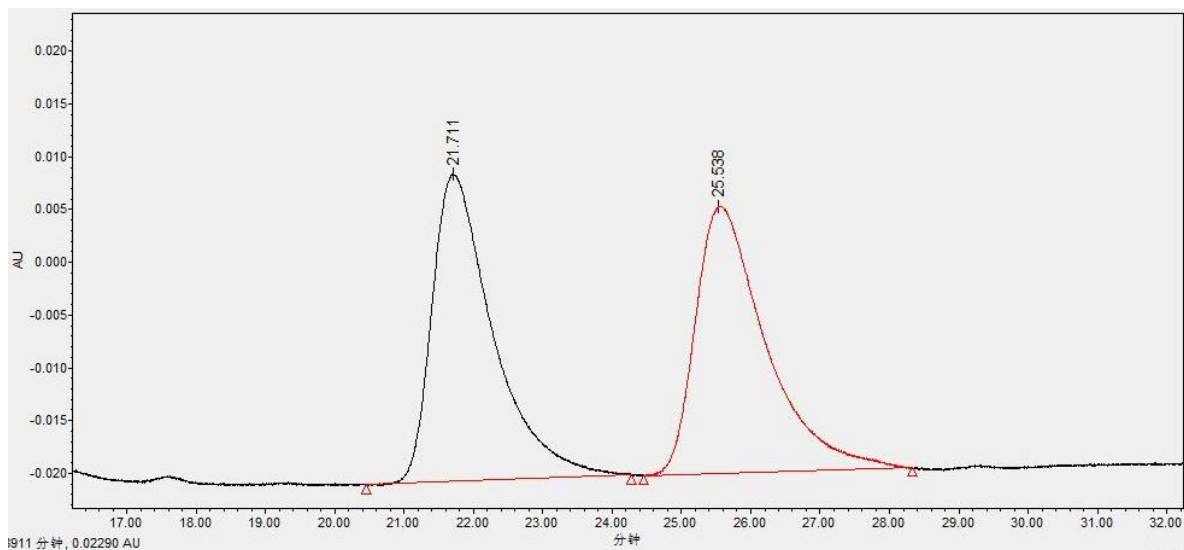

|          | Time/min | Area    | Height | Area% |
|----------|----------|---------|--------|-------|
| <b>1</b> | 21.711   | 1785034 | 29197  | 49.99 |
| <b>2</b> | 25.538   | 1786105 | 25363  | 50.01 |

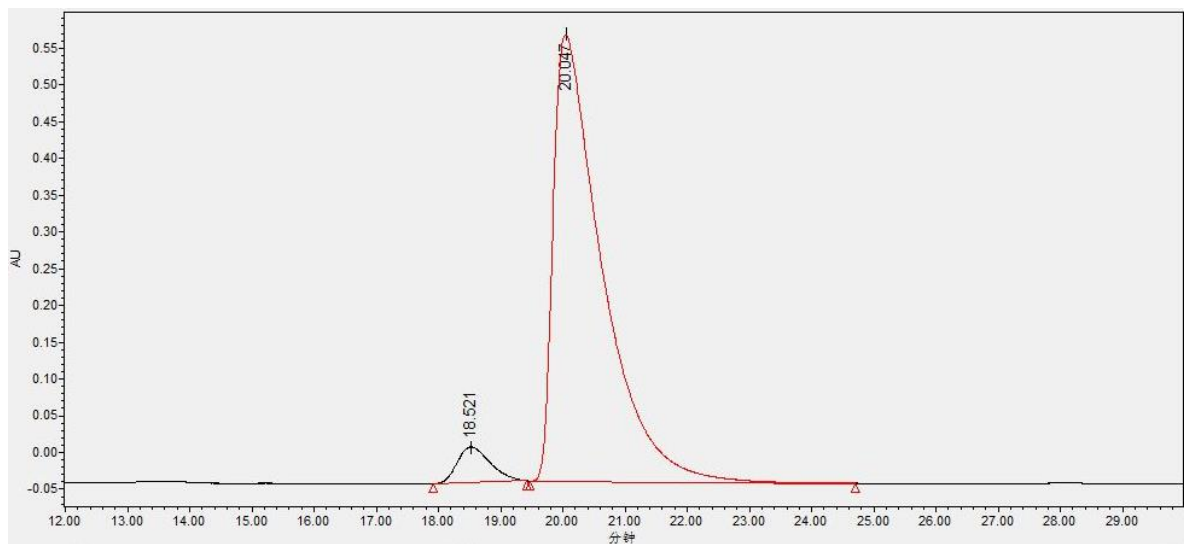

|          | Time/min | Area     | Height | Area% |
|----------|----------|----------|--------|-------|
| <b>1</b> | 18.521   | 1781880  | 48488  | 5.12  |
| <b>2</b> | 20.047   | 33028250 | 607257 | 94.88 |

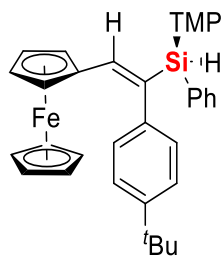

9d

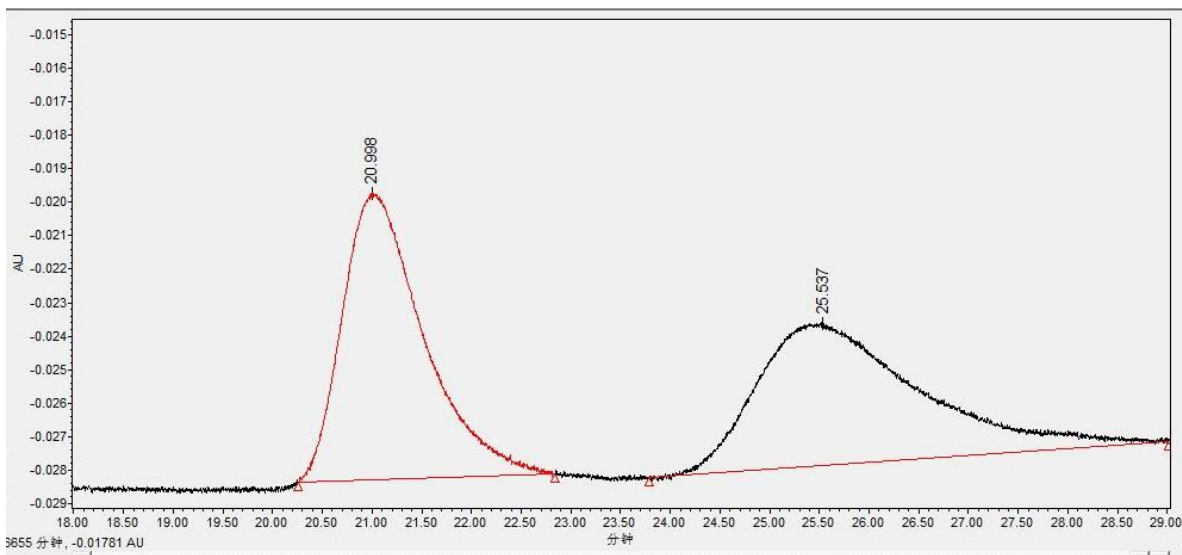

|   | Time/min | Area   | Height | Area% |
|---|----------|--------|--------|-------|
| 1 | 20.998   | 485373 | 8586   | 50.25 |
| 2 | 25.537   | 480465 | 4268   | 49.75 |

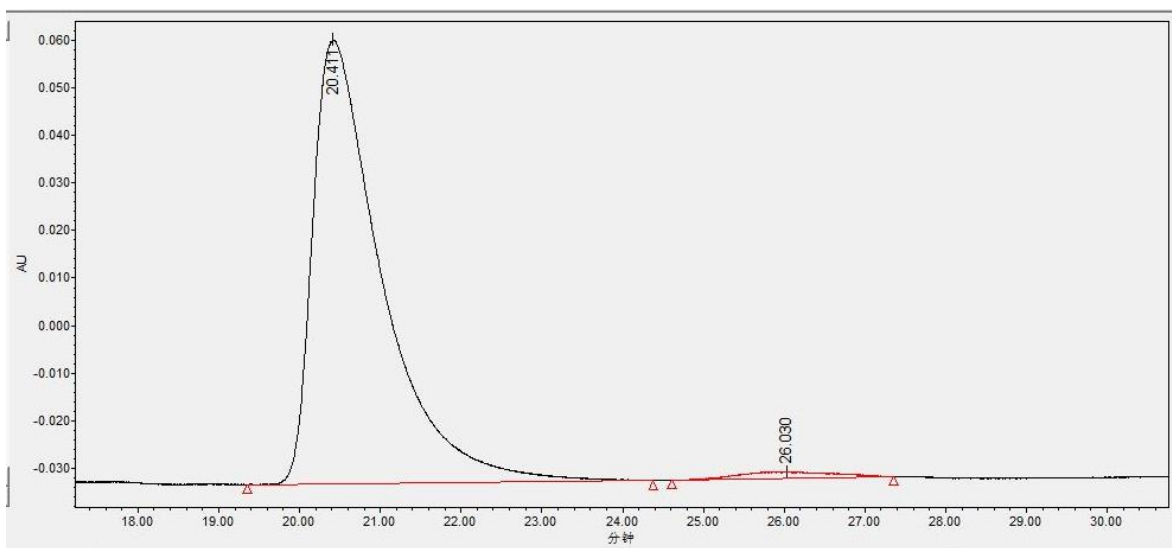

|   | Time/min | Area    | Height | Area% |
|---|----------|---------|--------|-------|
| 1 | 20.411   | 5522570 | 93154  | 98.02 |
| 2 | 26.030   | 111681  | 1409   | 1.98  |

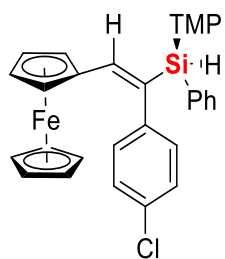

9e

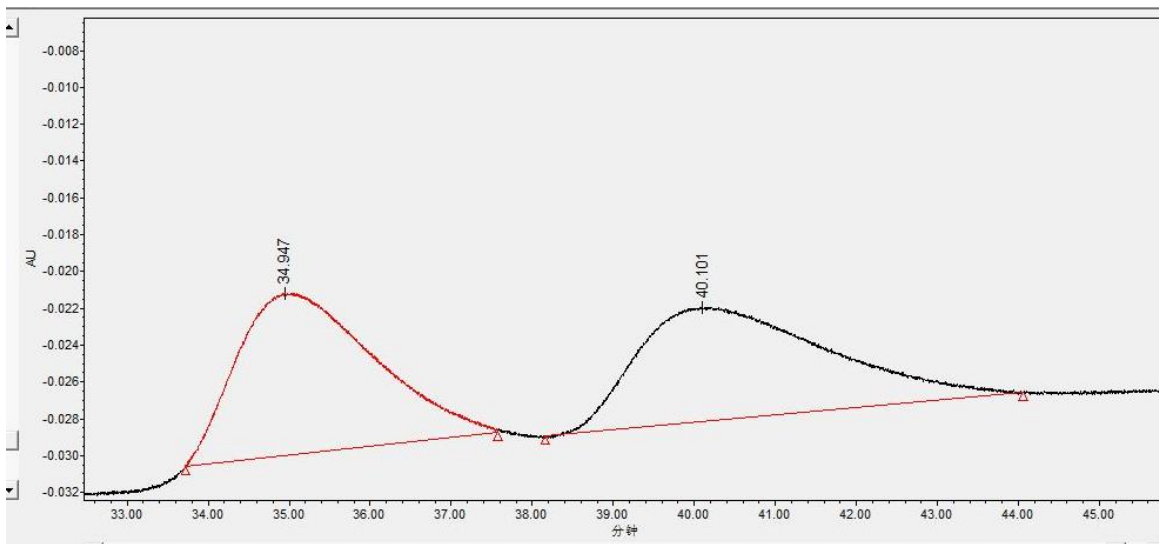

|   | Time/min | Area    | Height | Area% |
|---|----------|---------|--------|-------|
| 1 | 34.947   | 1029903 | 8809   | 50.58 |
| 2 | 40.101   | 1006181 | 6229   | 49.42 |

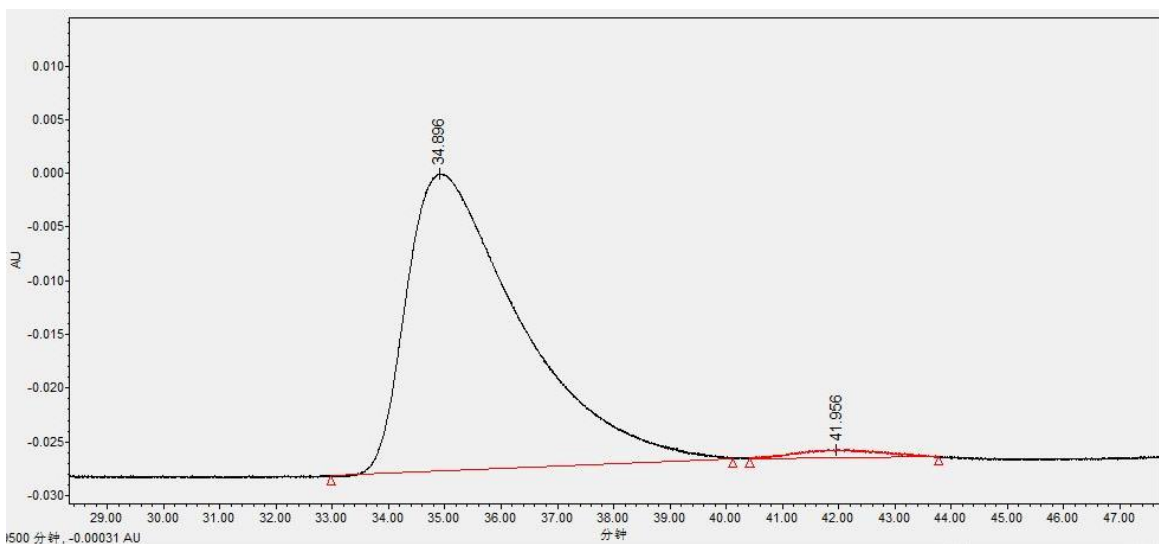

|   | Time/min | Area    | Height | Area% |
|---|----------|---------|--------|-------|
| 1 | 34.896   | 3897846 | 27758  | 98.14 |
| 2 | 41.956   | 74036   | 752    | 1.86  |

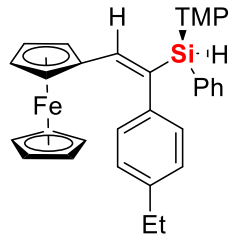

9f

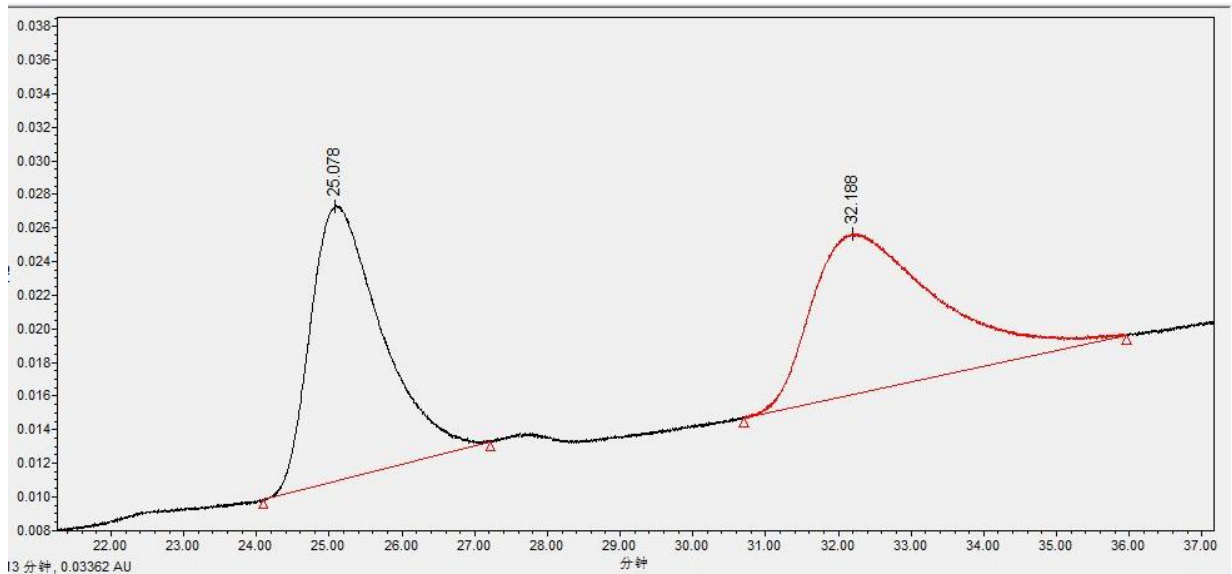

|   | Time/min | Area    | Height | Area% |
|---|----------|---------|--------|-------|
| 1 | 25.078   | 1110204 | 16432  | 49.72 |
| 2 | 32.188   | 1122869 | 9576   | 50.26 |

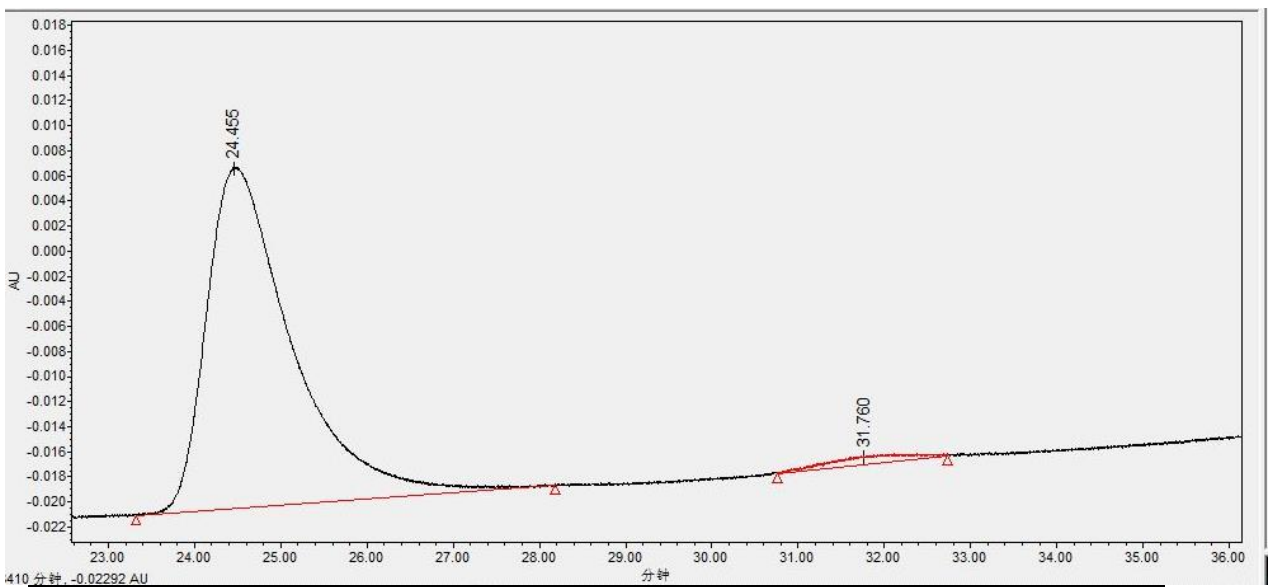

|   | Time/min | Area    | Height | Area% |
|---|----------|---------|--------|-------|
| 1 | 24.455   | 1863560 | 27145  | 97.86 |
| 2 | 31.760   | 40839   | 649    | 2.14  |

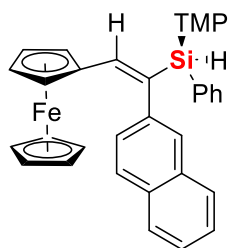

9g

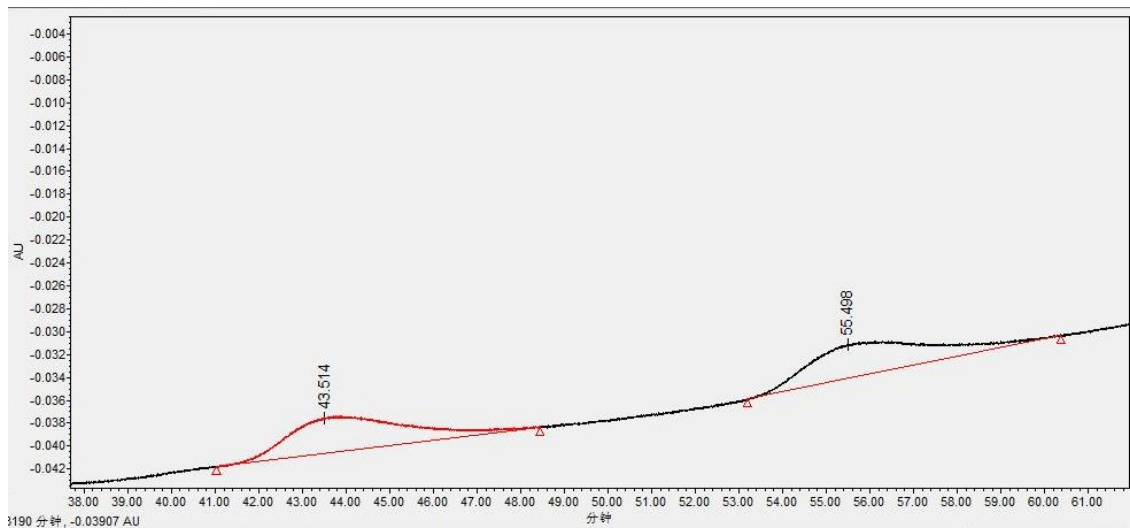

|   | Time/min | Area   | Height | Area% |
|---|----------|--------|--------|-------|
| 1 | 43.514   | 572265 | 3150   | 50.28 |
| 2 | 55.498   | 565979 | 3017   | 49.72 |

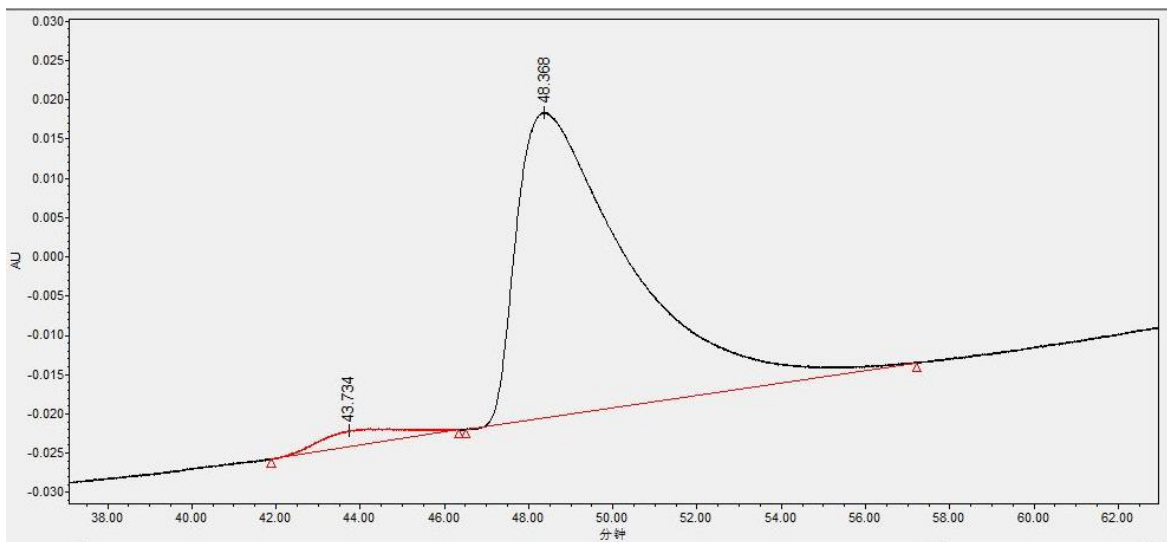

|   | Time/min | Area    | Height | Area% |
|---|----------|---------|--------|-------|
| 1 | 43.734   | 263976  | 2064   | 3.54  |
| 2 | 48.368   | 7195450 | 38967  | 96.46 |

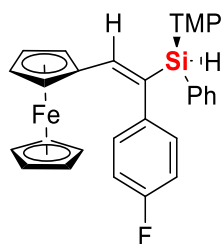

9h

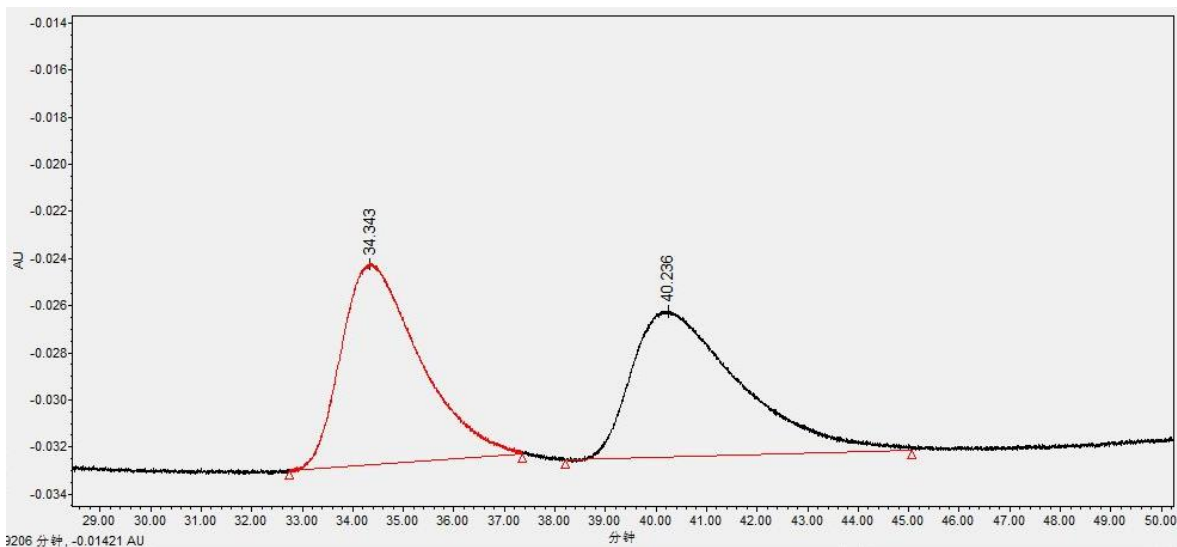

|   | Time/min | Area   | Height | Area% |
|---|----------|--------|--------|-------|
| 1 | 35.371   | 828081 | 8675   | 50.34 |
| 2 | 39.909   | 816930 | 6565   | 49.66 |

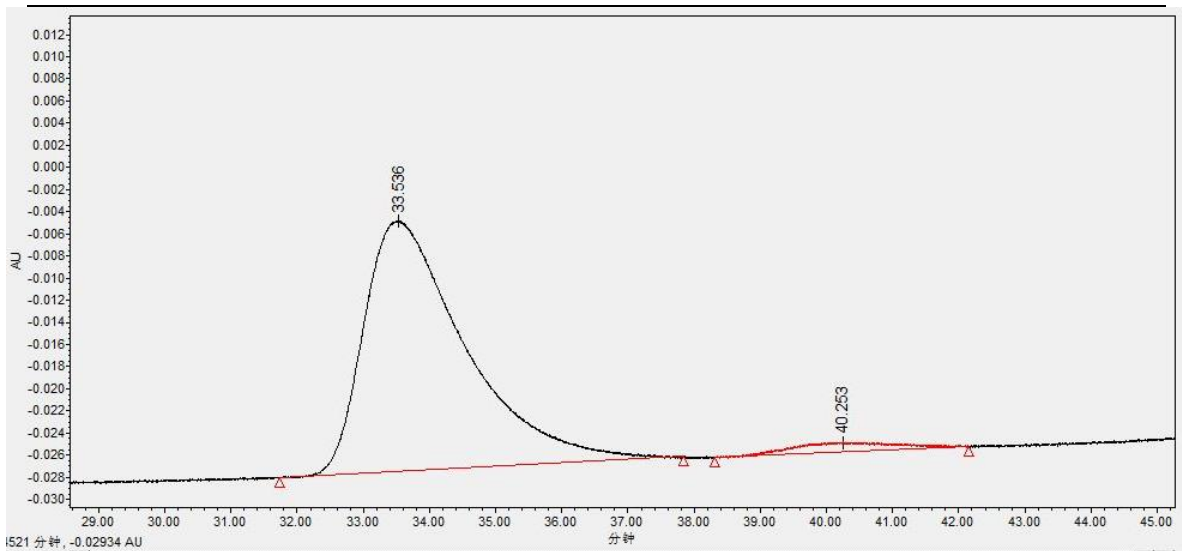

|   | Time/min | Area    | Height | Area% |
|---|----------|---------|--------|-------|
| 1 | 33.536   | 2418736 | 22668  | 96.04 |
| 2 | 40.253   | 99717   | 922    | 3.96  |



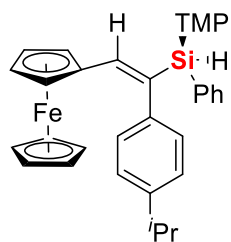

9i

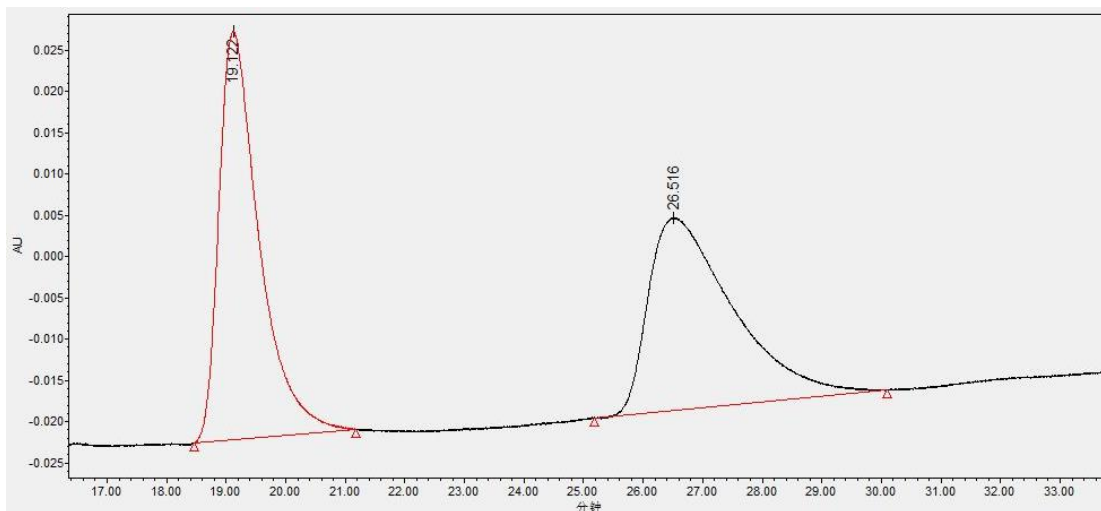

|   | Time/min | Area    | Height | Area% |
|---|----------|---------|--------|-------|
| 1 | 19.122   | 2321459 | 49441  | 50.40 |
| 2 | 26.516   | 2284722 | 23327  | 49.60 |

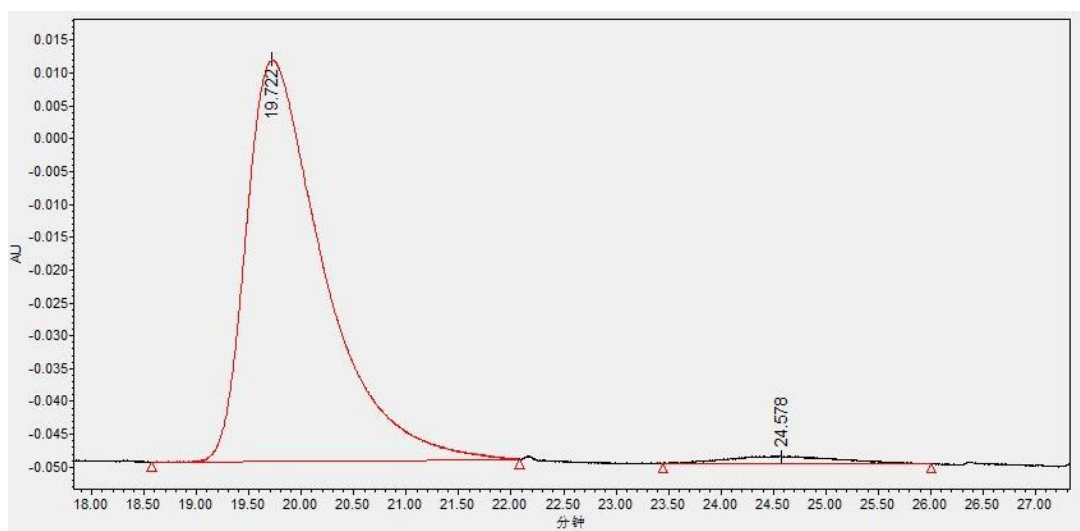

|   | Time/min | Area    | Height | Area% |
|---|----------|---------|--------|-------|
| 1 | 19.722   | 3131360 | 61087  | 97.55 |
| 2 | 24.578   | 78683   | 1111   | 2.45  |

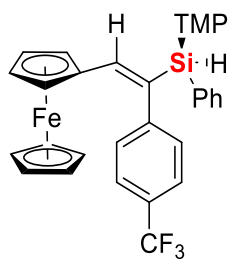

9j

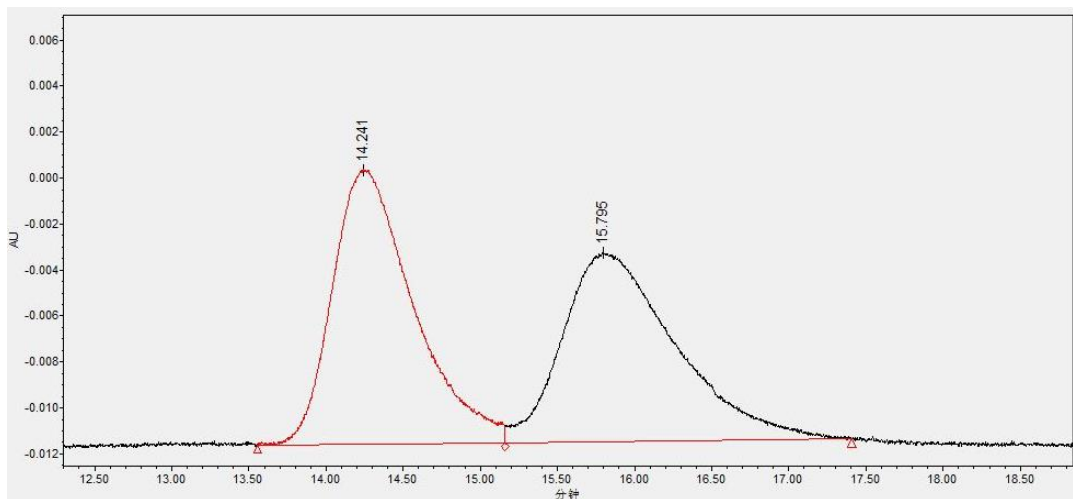

|   | Time/min | Area   | Height | Area% |
|---|----------|--------|--------|-------|
| 1 | 14.241   | 434400 | 11918  | 50.97 |
| 2 | 15.795   | 417907 | 8229   | 49.03 |

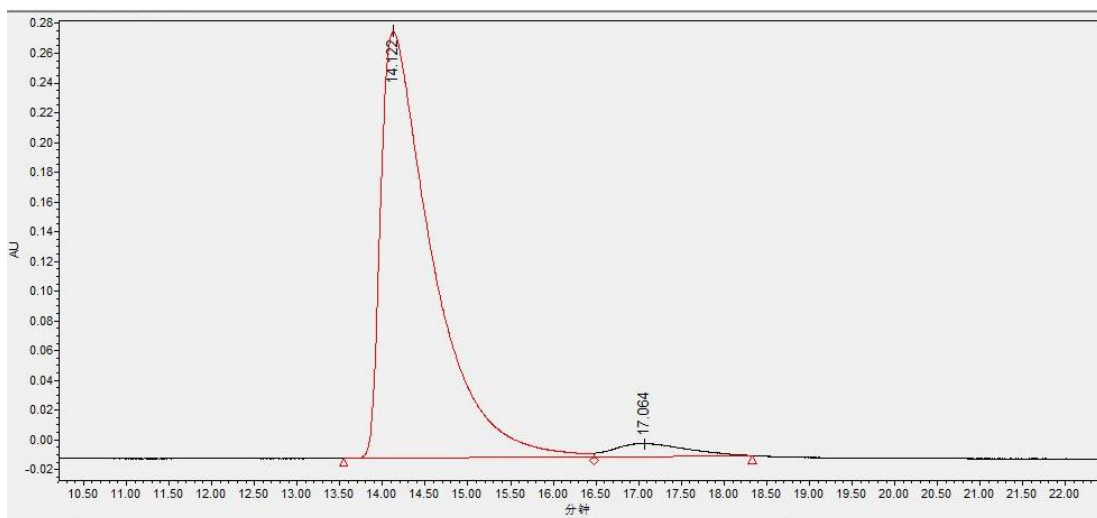

|   | Time/min | Area     | Height | Area% |
|---|----------|----------|--------|-------|
| 1 | 14.122   | 11983976 | 286494 | 95.96 |
| 2 | 17.064   | 504007   | 8652   | 4.04  |

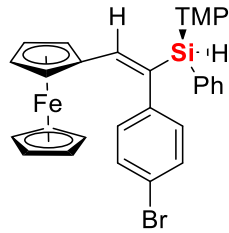

9k

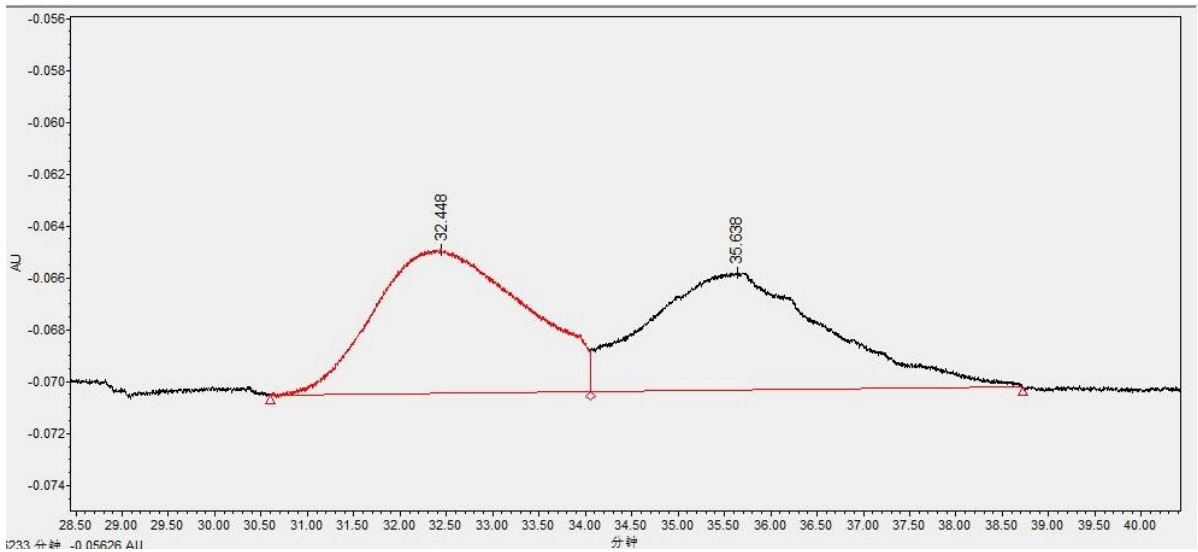

|   | Time/min | Area   | Height | Area% |
|---|----------|--------|--------|-------|
| 1 | 32.448   | 626729 | 5556   | 50.68 |
| 2 | 35.638   | 609939 | 4535   | 49.32 |

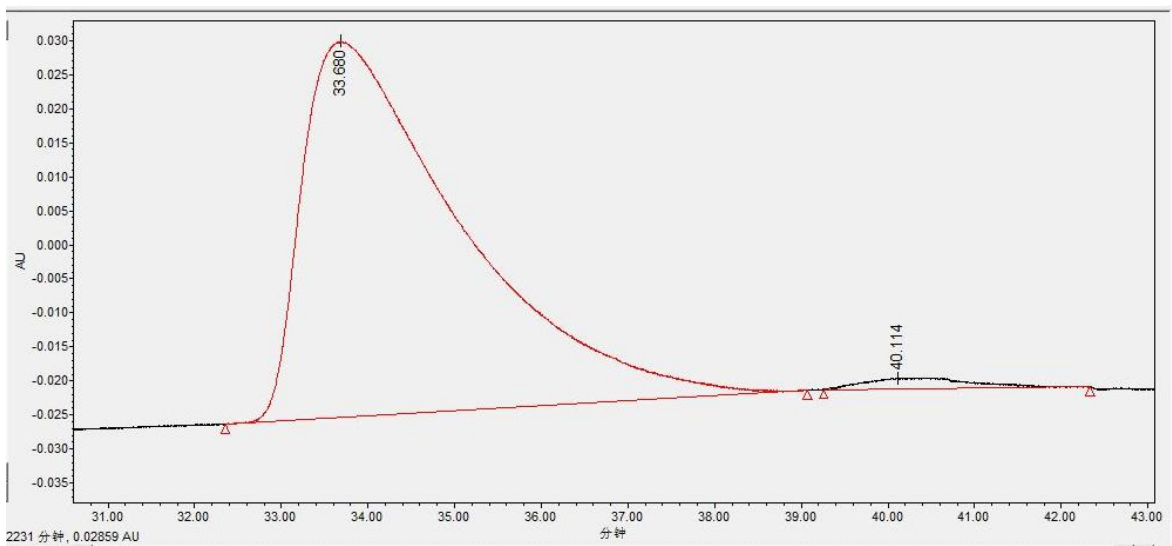

|   | Time/min | Area    | Height | Area% |
|---|----------|---------|--------|-------|
| 1 | 33.680   | 7094678 | 55297  | 98.14 |
| 2 | 40.114   | 134680  | 1569   | 1.86  |

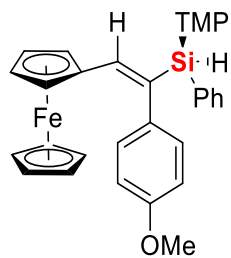

91

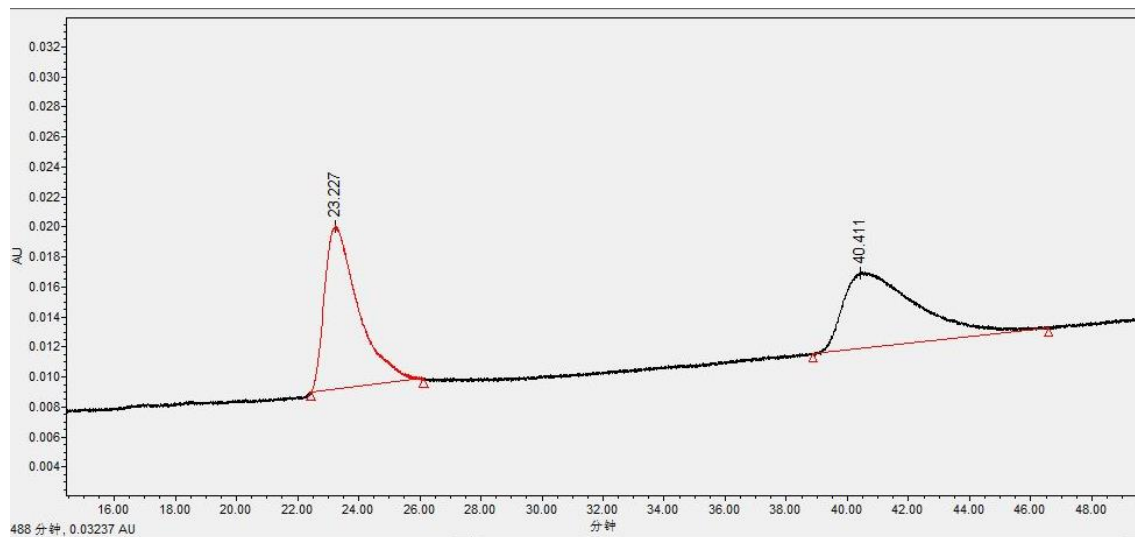

|   | Time/min | Area   | Height | Area% |
|---|----------|--------|--------|-------|
| 1 | 23.227   | 833675 | 10923  | 50.28 |
| 2 | 40.411   | 824391 | 5068   | 49.72 |

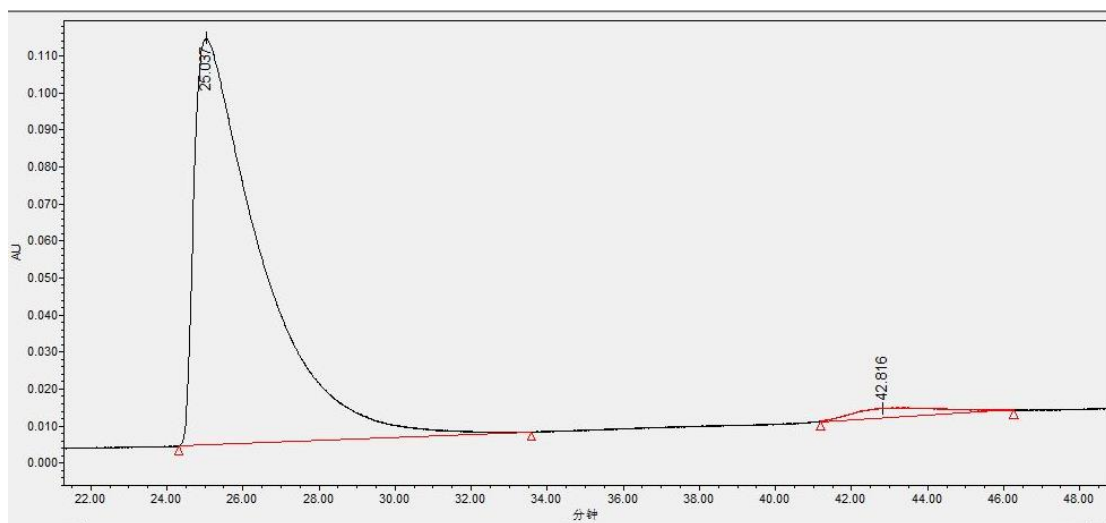

|   | Time/min | Area     | Height | Area% |
|---|----------|----------|--------|-------|
| 1 | 25.037   | 13313507 | 109808 | 97.01 |
| 2 | 42.816   | 409713   | 2609   | 2.99  |

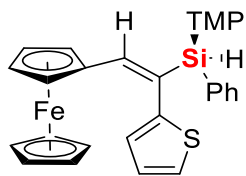

9m

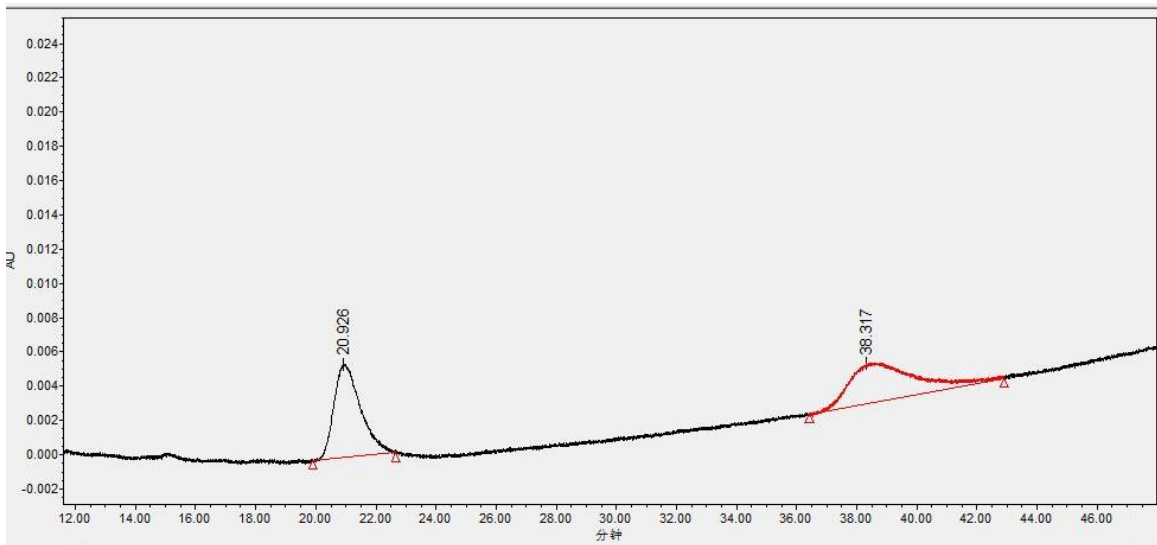

|   | Time/min | Area   | Height | Area% |
|---|----------|--------|--------|-------|
| 1 | 20.926   | 334691 | 5474   | 50.34 |
| 2 | 38.317   | 330129 | 2345   | 49.66 |

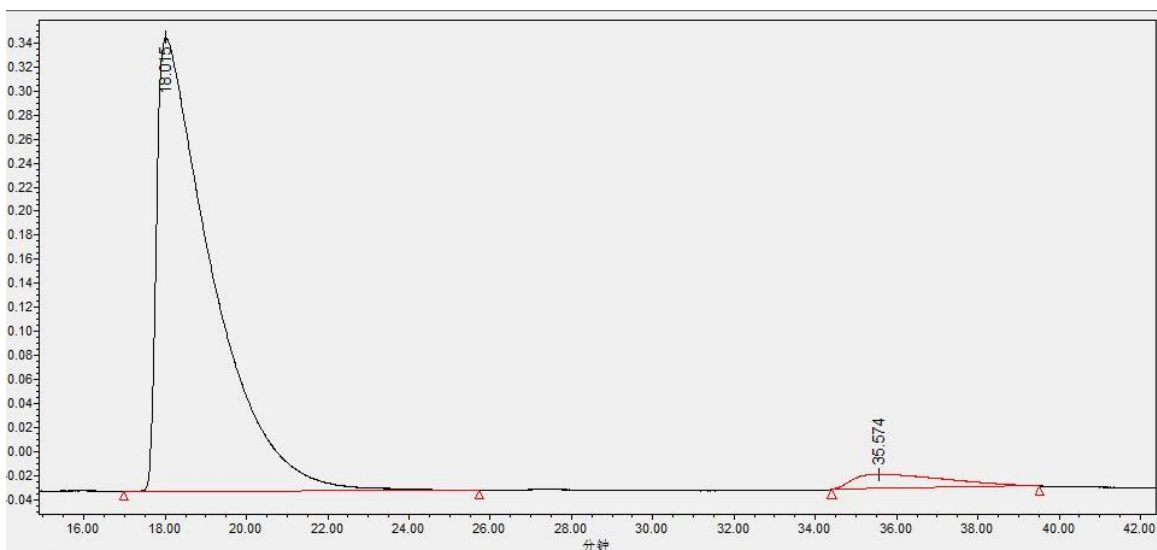

|   | Time/min | Area     | Height | Area% |
|---|----------|----------|--------|-------|
| 1 | 18.015   | 35604274 | 377271 | 94.87 |
| 2 | 35.574   | 1925584  | 12115  | 5.13  |

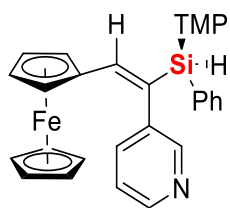

9n

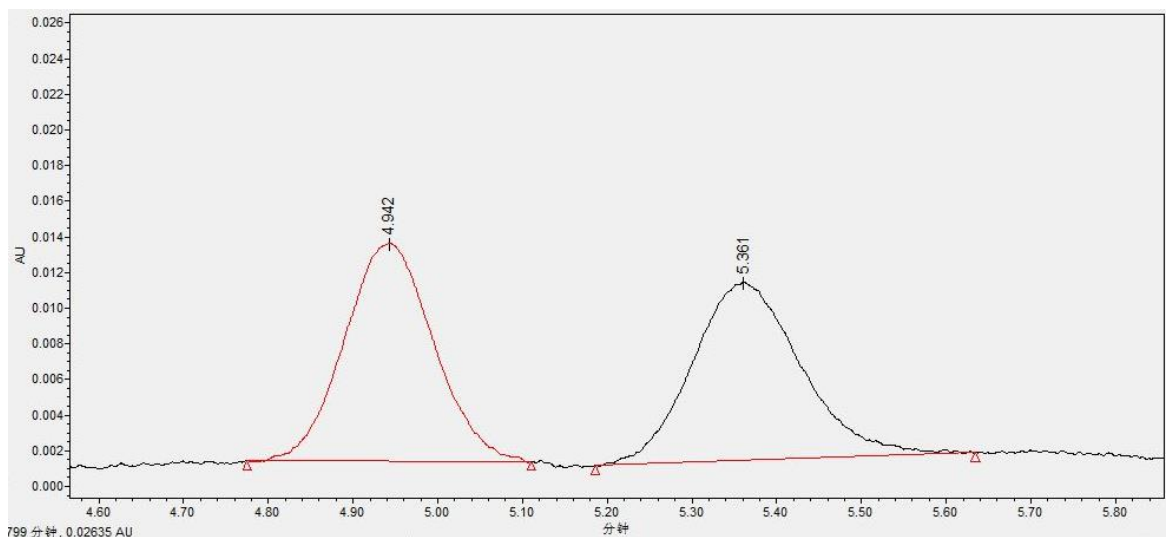

|   | Time/min | Area  | Height | Area% |
|---|----------|-------|--------|-------|
| 1 | 4.942    | 89095 | 12210  | 50.07 |
| 2 | 5.361    | 88857 | 9996   | 49.93 |

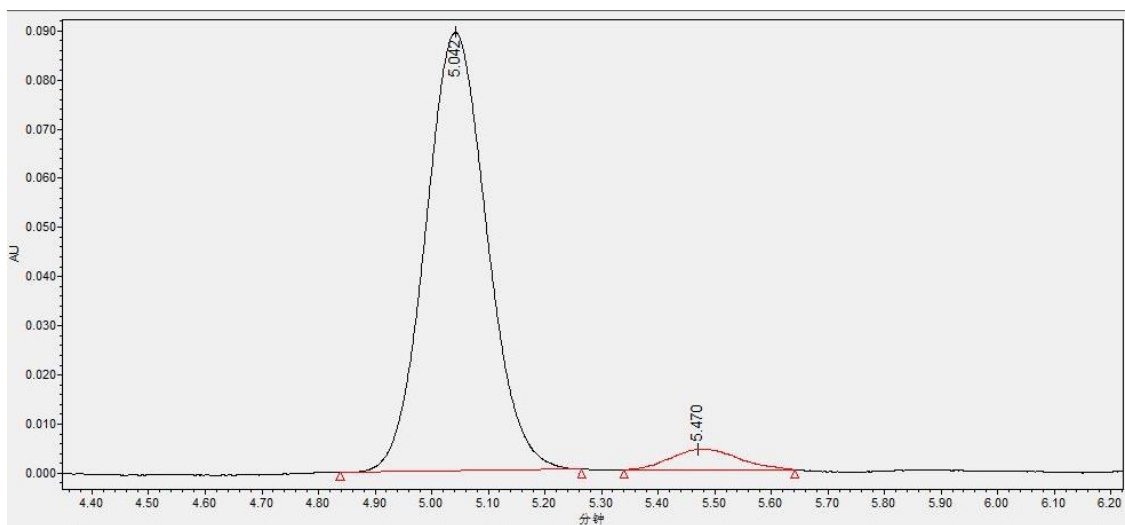

|   | Time/min | Area   | Height | Area% |
|---|----------|--------|--------|-------|
| 1 | 5.042    | 670829 | 89156  | 95.00 |
| 2 | 5.470    | 35305  | 4206   | 5.00  |

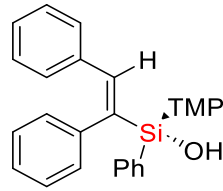

**3aa**

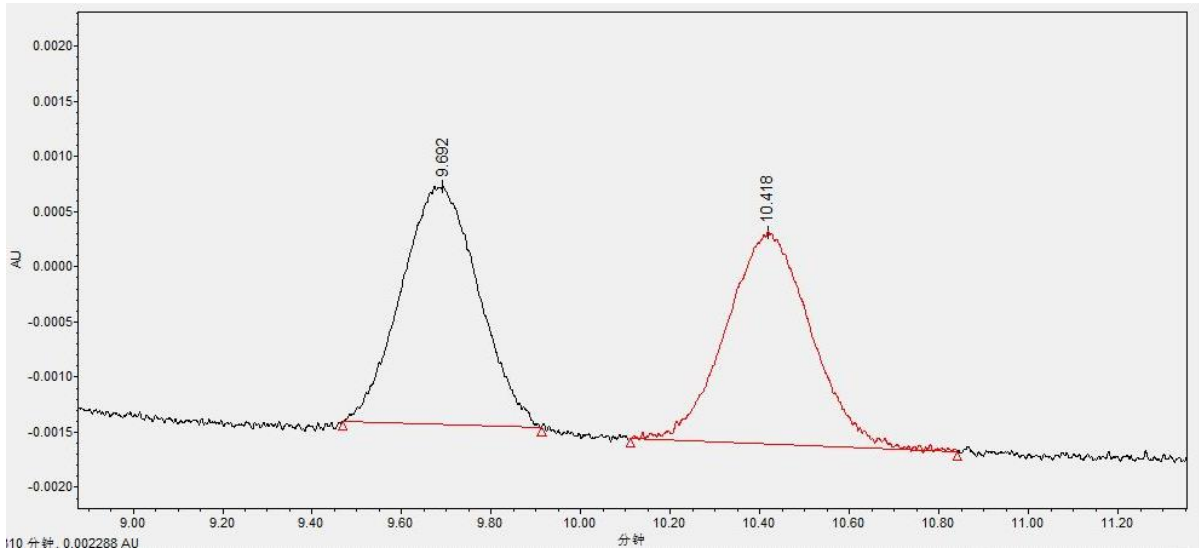

|          | Time/min | Area  | Height | Area% |
|----------|----------|-------|--------|-------|
| <b>1</b> | 9.692    | 25935 | 2162   | 50.59 |
| <b>2</b> | 10.418   | 25331 | 1929   | 49.41 |

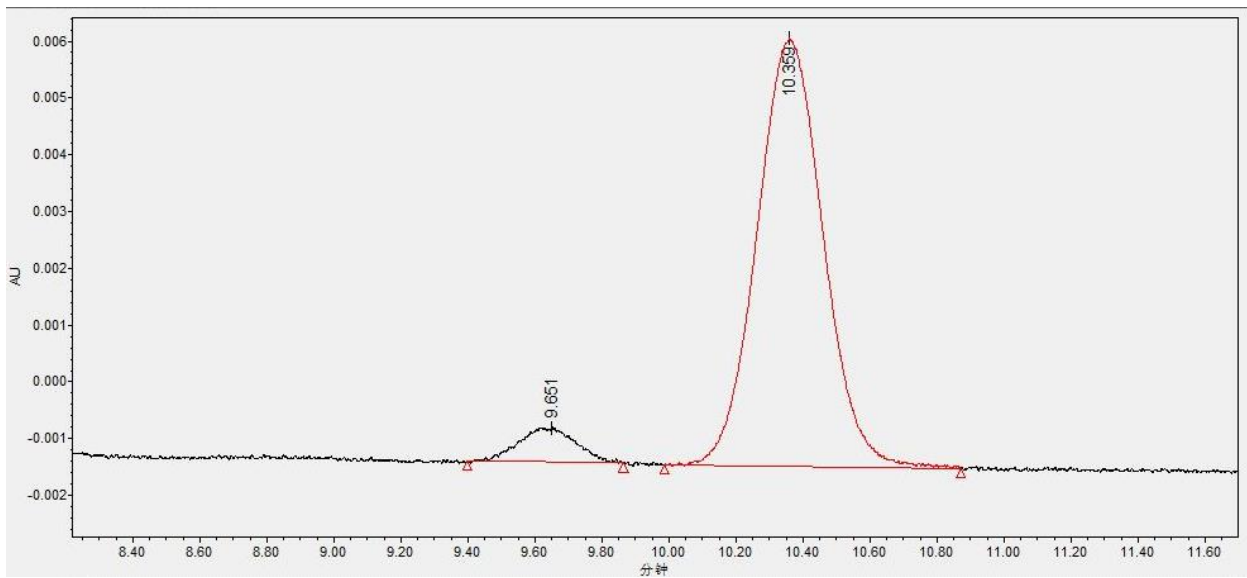

|          | Time/min | Area   | Height | Area% |
|----------|----------|--------|--------|-------|
| <b>1</b> | 9.651    | 7171   | 609    | 6.49  |
| <b>2</b> | 10.359   | 103351 | 7537   | 93.51 |

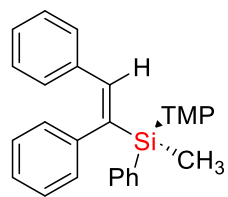

**3ab**

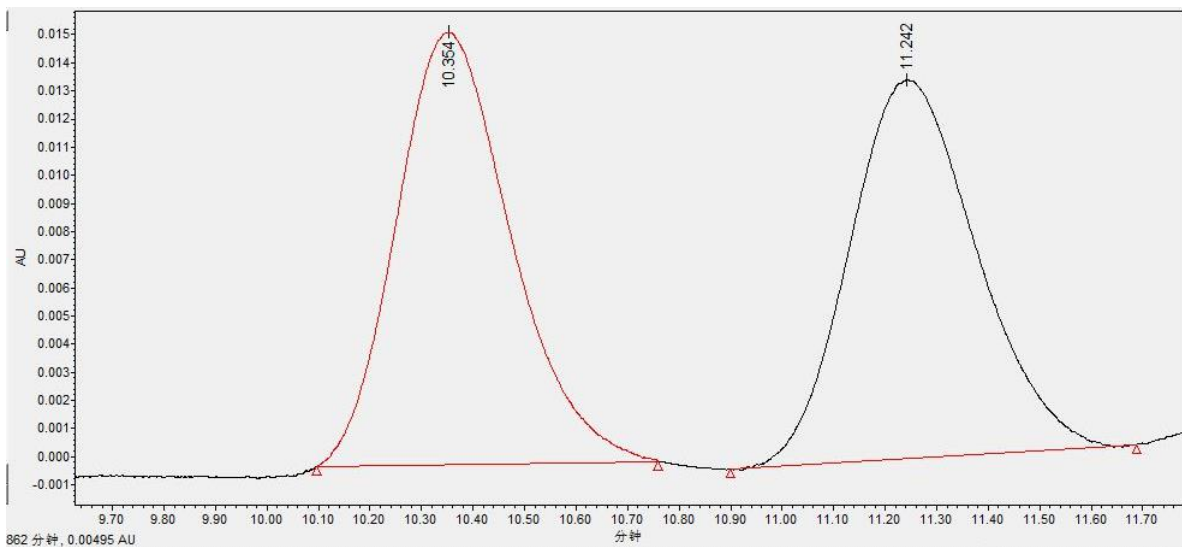

|          | Time/min | Area   | Height | Area% |
|----------|----------|--------|--------|-------|
| <b>1</b> | 10.354   | 236385 | 15343  | 50.79 |
| <b>2</b> | 11.242   | 229035 | 13468  | 49.21 |

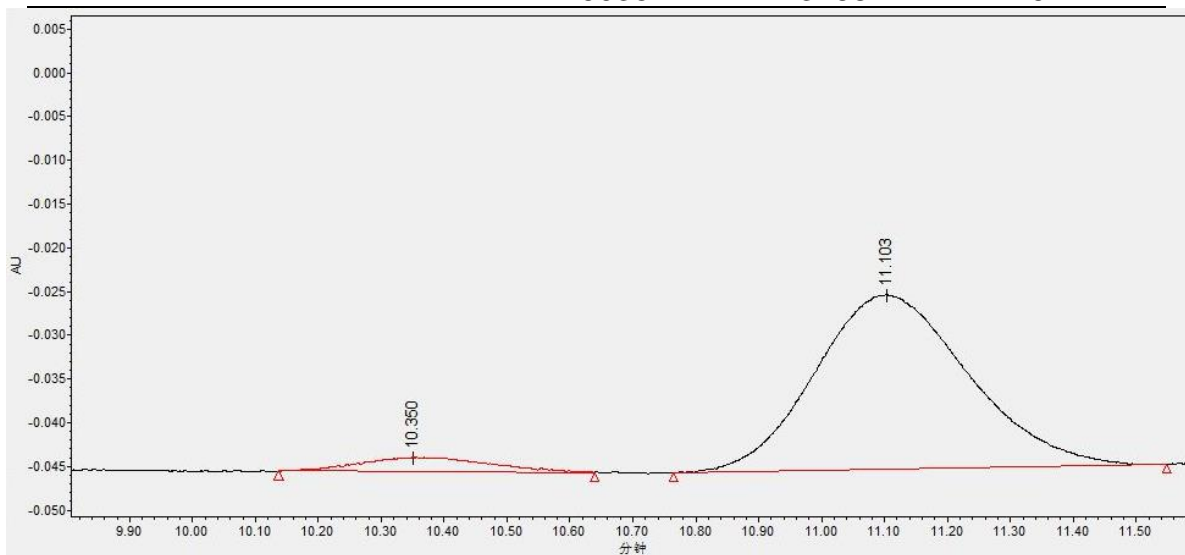

|          | Time/min | Area   | Height | Area% |
|----------|----------|--------|--------|-------|
| <b>1</b> | 10.350   | 23133  | 1627   | 6.44  |
| <b>2</b> | 11.103   | 336217 | 19914  | 93.56 |
